# Supplementary material for: Multi-omic characterisation of Streptomyces hygroscopicus NRRL 30439: detailed assessment of its secondary metabolic potential
Source: Royal Society of Chemistry journal article supplement (doi:10.1039/d1mo00150g), 2021-12-21
Supplement: d1mo00150g1.xlsx [file d1mo00150g1.xlsx]

## Sheet: Table1
Fermentation of Streptomyces hygroscopicus NRRL 30439 in chemically defined media
Data collected for exometabolomics, proteomics, and biomass quantification
Seed train: Starch media, 48 hours --> LB media (40 g Gluc / L) for 24 hours --> SCDM in Reactor #3 for 16 hours --> Reactors 1, 2, and 4 for 167 hours
Paramaters:
	Stirring/Air/O2: Cascade
	pH: 7
	Antifoam addition through AFOAMT when required: SAG471 (33%, constantly agitated) was used
	Starting Volume: 1 L (SCDM)
	Inoculation time:		2018-08-21 09:45:00	; Inoculated with 50 mL from Reactor #3
R1	SH5					Sample Volume Taken (mL)			YSI Glucose Reading
Label	Date	Time	Biomass (g DCW/L)	Empty tube (g)	Tube + DCW (g)	Reactor Volume (L)	Metabo./Biom.	Proteo.	Dilution	Reading (mmol/L)	g Gluc /L
SH501	2018-08-21 09:45:00	0	3.8	0.9932	0.997	1048	1	1	10	20.4	36.7518
SH502	2018-08-21 15:30:00	5.75	3.4	0.9791	0.9825	1046	1	1
SH503	2018-08-21 17:30:00	7.75	2.1	0.9928	0.9949	1044	1	1
SH504	2018-08-21 20:00:00	10.25	3	0.9946	0.9976	1039	1	4				Antifoam added
SH505	2018-08-21 21:15:00	11.5	5.3	0.9843	0.9896	1034	1	4
SH506	2018-08-21 22:50:00	13.0833	3.3	0.9943	0.9976	1029	1	4	10	19.4	34.9503
SH507	2018-08-22 00:35:00	14.8333	4.8	0.9895	0.9943	1024	1	4				Antifoam added
SH508	2018-08-22 02:15:00	16.5	6.9	0.9906	0.9975	1019	1	4
SH509	2018-08-22 04:00:00	18.25	5.8	0.9859	0.9917	1014	1	4				Antifoam added
SH510	2018-08-22 05:20:00	19.5833	5.8	0.9968	1.0026	1009	1	4				Antifoam added
SH511	2018-08-22 08:00:00	22.25	6.5	0.9948	1.0013	1004	1	4				Antifoam added
SH512	2018-08-22 11:30:00	25.75	9.4	0.9784	0.9878	999	1	4				AF added; had foamed out by ~200mL
SH513	2018-08-23 00:05:00	38.3333	10.9	0.9927	1.0036	994	1	4	10	12.9	23.2401
SH514	2018-08-23 09:26:00	47.6833	10.4	0.9941	1.0045	989	1	4	10	9.59	17.277
SH515	2018-08-23 11:25:00	49.6667	10.5	0.993	1.0035	984	1	4
SH516	2018-08-23 16:30:00	54.75	10.5	0.9945	1.005	979	1	4	10	7.81	14.0702
SH517	2018-08-24 10:30:00	72.75	9.3	0.9904	0.9997	974	1	4	10	4.26	7.67465
SH518	2018-08-24 17:00:00	79.25	7.7	0.9791	0.9868	969	1	4
SH519	2018-08-25 13:20:00	99.5833	6.2	0.9905	0.9967	964	1	4	10	4.19	7.54854	reactor had foamed out; a increasing gradient in DO from 25/08 11 AM may indicate when foaming occurred; contents of the foam trap were pressure-delivered back into the reactor
SH520	2018-08-26 17:30:00	127.75	7.2	0.9949	1.0021	959	1	4
SH521	2018-08-27 09:10:00	143.417	5.1	0.9865	0.9916	954	1	4
SH522	2018-08-27 15:40:00	149.917	5.1	0.9847	0.9898	949	1	4
SH523	2018-08-28 08:50:00	167.083	5.6	0.9848	0.9904	944	1	4
R2	SH6					Sample Volume Taken (mL)			YSI Glucose Reading
Label	Date	Time	Biomass (g DCW/L)	Empty tube (g)	Tube + DCW (g)	Reactor Volume (L)	Metabo./Biom.	Proteo.	Dilution	Reading (mmol/L)	g Gluc /L
SH601	2018-08-21 09:45:00	0	4.7	0.9932	0.9979	1048	1	1	10	20.2	36.3915
SH602	2018-08-21 15:30:00	5.75	1.9	0.9864	0.9883	1046	1	1
SH603	2018-08-21 17:30:00	7.75	3	0.9861	0.9891	1044	1	1
SH604	2018-08-21 20:00:00	10.25	3.3	0.9936	0.9969	1034	1	9				Antifoam added; 5mL removed as waste - 4 mL for proteomics
SH605	2018-08-21 21:15:00	11.5	5.1	0.9948	0.9999	1029	1	4
SH606	2018-08-21 22:50:00	13.0833	4.8	0.9947	0.9995	1024	1	4	10	19.5	35.1304
SH607	2018-08-22 00:35:00	14.8333	5.1	0.9887	0.9938	1019	1	4				Antifoam added
SH608	2018-08-22 02:15:00	16.5	6.6	0.9967	1.0033	1014	1	4
SH609	2018-08-22 04:00:00	18.25	7	0.9948	1.0018	1009	1	4				Antifoam added
SH610	2018-08-22 05:20:00	19.5833	8.9	0.9947	1.0036	1004	1	4				Antifoam added
SH611	2018-08-22 08:00:00	22.25	6.8	0.9923	0.9991	999	1	4				Antifoam added
SH612	2018-08-22 11:30:00	25.75	7.4	0.9899	0.9973	994	1	4				AF added; had foamed out by ~200mL
SH613	2018-08-23 00:05:00	38.3333	7	0.9946	1.0016	989	1	4	10	14.1	25.402
SH614	2018-08-23 09:26:00	47.6833	10.3	0.9882	0.9985	984	1	4	10	11.4	20.5378
SH615	2018-08-23 11:25:00	49.6667	9.7	0.993	1.0027	979	1	4
SH616	2018-08-23 16:30:00	54.75	9.8	0.9853	0.9951	974	1	4	10	9.04	16.2861
SH617	2018-08-24 10:30:00	72.75	9.8	0.9936	1.0034	969	1	4	10	2.61	4.70207
SH618	2018-08-24 17:00:00	79.25	7.9	0.9952	1.0031	964	1	4
SH619	2018-08-25 13:20:00	99.5833	7	0.9933	1.0003	959	1	4	10	2.61	4.70207
SH620	2018-08-26 17:30:00	127.75	6.9	0.9845	0.9914	954	1	4
SH621	2018-08-27 09:10:00	143.417	7	0.9929	0.9999	949	1	4
SH622	2018-08-27 15:40:00	149.917	6.8	0.9948	1.0016	944	1	4
SH623	2018-08-28 08:50:00	167.083	7	0.9928	0.9998	939	1	4
R4	SH8					Sample Volume Taken (mL)			YSI Glucose Reading
Label	Date	Time	Biomass (g DCW/L)	Empty tube (g)	Tube + DCW (g)	Reactor Volume (L)	Metabo./Biom.	Proteo.	Dilution	Reading (mmol/L)	g Gluc /L
SH801	2018-08-21 09:45:00	0	2.6	0.9897	0.9923	1048	1	1	10	19.3	34.7701
SH802	2018-08-21 15:30:00	5.75	2.2	0.9948	0.997	1046	1	1
SH803	2018-08-21 17:30:00	7.75	4.5	0.9845	0.989	1044	1	1
SH804	2018-08-21 20:00:00	10.25	3.5	0.9855	0.989	1039	1	4				Antifoam added
SH805	2018-08-21 21:15:00	11.5	5.3	0.9902	0.9955	1034	1	4
SH806	2018-08-21 22:50:00	13.0833	5.3	0.9936	0.9989	1029	1	4	10	19.5	35.1304
SH807	2018-08-22 00:35:00	14.8333	7.1	0.9965	1.0036	1024	1	4
SH808	2018-08-22 02:15:00	16.5	8.5	0.993	1.0015	1019	1	4
SH809	2018-08-22 04:00:00	18.25	8.5	0.9923	1.0008	1014	1	4				Antifoam added
SH810	2018-08-22 05:20:00	19.5833	5.9	0.9788	0.9847	1009	1	4				Antifoam added
SH811	2018-08-22 08:00:00	22.25	6.9	0.9898	0.9967	1004	1	4				Antifoam added
SH812	2018-08-22 11:30:00	25.75	6.8	0.9929	0.9997	999	1	4				AF added; had foamed out by ~200mL
SH813	2018-08-23 00:05:00	38.3333	6.6	0.9941	1.0007	994	1	4	10	13.1	23.6004
SH814	2018-08-23 09:26:00	47.6833	7.8	0.9984	1.0062	989	1	4	10	8.87	15.9798
SH815	2018-08-23 11:25:00	49.6667	10.1	0.9862	0.9963	984	1	4
SH816	2018-08-23 16:30:00	54.75	10.2	0.9888	0.999	979	1	4	10	9.28	16.7185
SH817	2018-08-24 10:30:00	72.75	10.9	0.9949	1.0058	974	1	4	10	5.22	9.40414
SH818	2018-08-24 17:00:00	79.25	9.5	0.9906	1.0001	969	1	4
SH819	2018-08-25 13:20:00	99.5833	11.1	0.9844	0.9955	964	1	4	10	5.46	9.83652
SH820	2018-08-26 17:30:00	127.75	13.6	0.9905	1.0041	959	1	4
SH821	2018-08-27 09:10:00	143.417	8.5	0.9883	0.9968	954	1	4
SH822	2018-08-27 15:40:00	149.917	7.3	0.9928	1.0001	949	1	4
SH823	2018-08-28 08:50:00	167.083	9	0.9845	0.9935	944	1	4
Biomass (g DCW/L)
Time (hrs)	BioRep1 (BR1)	BioRep2 (BR2)	BioRep3 (BR4)	Average	SE
0	3.8	4.7	2.6	3.7	0.608276
5.75	3.4	1.9	2.2	2.5	0.458258
7.75	2.1	3	4.5	3.2	0.7
10.25	3	3.3	3.5	3.26667	0.145297
11.5	5.3	5.1	5.3	5.23333	0.0666667
13.0833	3.3	4.8	5.3	4.46667	0.600925
14.8333	4.8	5.1	7.1	5.66667	0.72188
16.5	6.9	6.6	8.5	7.33333	0.589727
18.25	5.8	7	8.5	7.1	0.781025
19.5833	5.8	8.9	5.9	6.86667	1.01708
22.25	6.5	6.8	6.9	6.73333	0.120185
25.75	9.4	7.4	6.8	7.86667	0.785988
38.3333	10.9	7	6.6	8.16667	1.37154
47.6833	10.4	10.3	7.8	9.5	0.85049
49.6667	10.5	9.7	10.1	10.1	0.23094
54.75	10.5	9.8	10.2	10.1667	0.202759
72.75	9.3	9.8	10.9	10	0.472582
79.25	7.7	7.9	9.5	8.36667	0.5696
99.5833	6.2	7	11.1	8.1	1.51767
127.75	7.2	6.9	13.6	9.23333	2.18505
143.417	5.1	7	8.5	6.86667	0.983757
149.917	5.1	6.8	7.3	6.4	0.665833
167.083	5.6	7	9	7.2	0.986577

## Sheet: Table2
Amino acid analysis
Post-processed data for Sartorius fermentation of Streptomyces hygroscopicus NRRL 30429 (08/2018); SH5-SH8
BR2 has 10 additional data points which can be found in 'AA_Processed_Data' of this workbook
AVG
Sample #	Time (hours)	GLU (mM)	ASN (mM)	SER (mM)	GLN (mM)	HIS (mM)	GLY (mM)	THR (mM)	ARG (mM)	ALA (mM)	Time (hours)	GLU (g/L)	ASN (g/L)	SER (g/L)	GLN (g/L)	HIS (g/L)	GLY (g/L)	THR (g/L)	ARG (g/L)	ALA (g/L)
1	0	0.423966	3.03972	8.42111	5.17828	5.43183	12.3728	7.78556	5.2947	8.3249	0	0.0623781	0.401607	0.884975	0.756754	0.842773	0.928824	0.927409	0.922337	0.741665
4	10.25	1.21453	2.80054	7.90041	3.86597	5.5753	13.3946	8.16497	4.58743	6.68386	10.25	0.178694	0.370007	0.830254	0.564973	0.865034	1.00553	0.972605	0.799131	0.595465
6	13.0833	2.0718	1.62705	4.95631	1.55409	4.29224	12.1615	6.79896	2.85138	3.72131	13.0833	0.304824	0.214966	0.520859	0.227114	0.665961	0.912967	0.809886	0.49671	0.331532
8	16.5	2.26728	0.023643	0.184203	0.0357119	2.09504	11.0445	5.40173	0.657196	1.2818	16.5	0.333585	0.00312372	0.0193579	0.00521893	0.325056	0.82911	0.64345	0.114484	0.114196
12	25.75	0.586137	0.00241446	0.00649304	0.0234646	0.00551759	2.00004	1.06464	0.00722721	1.6353	25.75	0.0862383	0.000318999	0.000682353	0.00342911	0.000856079	0.150143	0.126819	0.00125898	0.145689
13	38.3333	0.545078	0.00230669	0.00228535	0.00580384	0.00483338	0.0788434	0.0554585	0.00611255	0.27158	38.3333	0.0801974	0.00030476	0.000240167	0.000848173	0.000749922	0.00591878	0.00660618	0.00106481	0.024195
14	47.6833	0.575376	0.00363111	0.00340606	0.0059145	0.00622566	0.0201426	0.00980312	0.00905967	0.261957	47.6833	0.0846551	0.000479742	0.000357943	0.000864345	0.000965939	0.0015121	0.00116774	0.00157819	0.0233377
16	54.75	0.525586	0.00430526	0.00291364	0.00239051	0.00782016	0.0253245	0.0180551	0.0119311	0.293126	54.75	0.0773295	0.000568811	0.000306194	0.00034935	0.00121333	0.00190111	0.0021507	0.0020784	0.0261146
17	72.75	0.212823	0.00586305	0.00344075	0.00125522	0.00941781	0.0236524	0.00960307	0.0214112	0.19307	72.75	0.0313126	0.000774626	0.000361589	0.000183438	0.00146122	0.00177559	0.00114391	0.00372983	0.0172006
18	79.25	0.292339	0.0105854	0.0152475	0.00173114	0.0122539	0.048694	0.0237343	0.0483769	0.264204	79.25	0.0430118	0.00139854	0.00160236	0.000252988	0.00190124	0.00365546	0.00282721	0.00842726	0.0235379
SE
Sample #	Time (hours)	GLU (mM)	ASN (mM)	SER (mM)	GLN (mM)	HIS (mM)	GLY (mM)	THR (mM)	ARG (mM)	ALA (mM)	Time (hours)	GLU (g/L)	ASN (g/L)	SER (g/L)	GLN (g/L)	HIS (g/L)	GLY (g/L)	THR (g/L)	ARG (g/L)	ALA (g/L)
1	0	0.165736	0.149251	0.457357	0.340817	0.250716	0.246075	0.148708	0.166436	0.382452	0	0.0243848	0.019719	0.0480636	0.049807	0.0388997	0.0184729	0.017714	0.0289932	0.0340727
4	10.25	0.0811667	0.18901	0.538103	0.314472	0.380456	0.901649	0.66166	0.385468	0.526194	10.25	0.0119421	0.024972	0.0565493	0.0459569	0.0590295	0.0676868	0.0788164	0.0671486	0.0468786
6	13.0833	0.0897661	0.103294	0.268125	0.16525	0.154109	0.220408	0.150869	0.304012	0.246144	13.0833	0.0132073	0.0136472	0.0281773	0.0241496	0.0239107	0.016546	0.0179714	0.052959	0.0219289
8	16.5	0.197462	0.0115391	0.115424	0.00343091	0.265704	0.15927	0.173087	0.450392	0.139637	16.5	0.0290526	0.00152454	0.0121299	0.000501394	0.0412253	0.0119564	0.020618	0.0784582	0.0124402
12	25.75	0.0153354	0.000330087	0.00106685	0.00191356	0.000347513	0.244624	0.276674	0.000600091	0.126147	25.75	0.0022563	4.36111e-05	0.000112115	0.000279647	5.39182e-05	0.0183639	0.0329572	0.000104536	0.0112384
13	38.3333	0.0762311	0.000417088	0.000263688	0.00128428	0.000132846	0.0417353	0.0351858	0.000415843	0.0971315	38.3333	0.0112159	5.51056e-05	2.7711e-05	0.000187685	2.06117e-05	0.00313307	0.00419131	7.24398e-05	0.00865344
14	47.6833	0.0803309	0.000265005	0.000815937	0.00258121	0.000530814	0.000996875	0.0029185	0.00202708	0.133402	47.6833	0.0118191	3.50124e-05	8.57468e-05	0.000377218	8.23582e-05	7.48354e-05	0.000347649	0.000353118	0.0118848
16	54.75	0.147282	0.000378434	0.000422491	0.00102487	0.000867906	0.00654105	0.012302	0.00220318	0.232592	54.75	0.0216695	4.99987e-05	4.43996e-05	0.000149774	0.00013466	0.000491037	0.00146541	0.000383793	0.0207216
17	72.75	0.0337784	0.000914538	0.000168443	0.000240914	0.00156097	0.00201525	0.00134146	0.00206339	0.110308	72.75	0.00496982	0.000120829	1.77017e-05	3.52071e-05	0.000242192	0.000151285	0.000159793	0.000359443	0.00982732
18	79.25	0.121558	0.00306918	0.0117822	0.00109457	0.0022541	0.0251622	0.0143821	0.0217891	0.172227	79.25	0.0178848	0.000405501	0.00123819	0.00015996	0.000349733	0.00188893	0.00171318	0.00379566	0.0153437
BR2	Sample Label; 6##
Sample #	Time (hours)	GLU (2° Ax.) (mol/L)	ASN (mol/L)	SER (mol/L)	GLN (mol/L)	HIS (mol/L)	GLY (mol/L)	THR (mol/L)	ARG (mol/L)	ALA (mol/L)	Time (hours)	GLU (2° Ax.) (g/L)	ASN (g/L)	SER (g/L)	GLN (g/L)	HIS (g/L)	GLY (g/L)	THR (g/L)	ARG (g/L)	ALA (g/L)
1	0	0.000168328	0.00322756	0.00903757	0.00563531	0.00574921	0.0126223	0.00788292	0.00546468	0.00881806	0	0.0247661	0.426426	0.949758	0.823544	0.892016	0.947554	0.939007	0.951947	0.785601
4	10.25	0.00135815	0.00306185	0.0086784	0.00419037	0.00623898	0.0150867	0.00940224	0.00519871	0.00721072	10.25	0.199824	0.404532	0.912013	0.612381	0.968006	1.13256	1.11999	0.905615	0.642403
6	13.0833	0.00191231	0.00183361	0.0054904	0.00188397	0.00459808	0.0125964	0.00709235	0.00344773	0.00420783	13.0833	0.281358	0.242257	0.576986	0.275323	0.713413	0.945612	0.844835	0.600595	0.374876
8	16.5	0.00252958	4.67001e-05	0.000414942	3.87169e-05	0.00261795	0.0113351	0.0057261	0.00155488	0.00153835	16.5	0.372178	0.00617001	0.0436063	0.00565809	0.406187	0.850923	0.682089	0.270861	0.137052
12	25.75	0.000616458	2.0735e-06	7.09129e-06	2.23471e-05	4.92682e-06	0.00222561	0.00159531	6.84904e-06	0.00185473	25.75	0.0906995	0.00027395	0.000745223	0.0032658	0.000764419	0.167077	0.190032	0.0011931	0.165238
13	38.3333	0.000415634	2.8329e-06	2.81196e-06	8.35557e-06	5.02795e-06	0.000161154	0.000124821	5.29821e-06	0.000465825	38.3333	0.0611522	0.000374283	0.000295509	0.00122108	0.00078011	0.0120979	0.0148685	0.000922948	0.0415003
14	47.6833	0.000515523	4.12687e-06	4.5384e-06	1.07542e-05	5.16844e-06	2.15361e-05	1.53518e-05	5.00747e-06	0.000519746	47.6833	0.0758489	0.000545243	0.000476941	0.00157162	0.000801907	0.00161671	0.0018287	0.000872301	0.0463042
16	54.75	0.000675317	3.59603e-06	2.54874e-06	4.40009e-06	7.15285e-06	3.83865e-05	4.25613e-05	7.64016e-06	0.000757107	54.75	0.0993593	0.000475107	0.000267847	0.00064303	0.0011098	0.00288167	0.00506987	0.00133092	0.0674507
17	72.75	0.000245244	7.39642e-06	3.73282e-06	1.71193e-06	1.25088e-05	2.7576e-05	1.21451e-05	2.55277e-05	0.000412448	72.75	0.0360828	0.000977216	0.000392282	0.000250182	0.00194079	0.00207013	0.00144671	0.00444693	0.036745
18	79.25	0.000196199	7.51446e-06	1.73787e-06	5.06886e-07	1.19311e-05	2.10605e-05	8.14286e-06	2.78497e-05	6.26513e-05	79.25	0.0288668	0.000992811	0.000182633	7.40764e-05	0.00185116	0.00158101	0.000969971	0.00485142	0.00558161
BR1
Sample #	Time (hours)	GLU (mol/L)	ASN (mol/L)	SER (mol/L)	GLN (mol/L)	HIS (mol/L)	GLY (mol/L)	THR (mol/L)	ARG (mol/L)	ALA (mol/L)	Time (hours)	GLU (g/L)	ASN (g/L)	SER (g/L)	GLN (g/L)	HIS (g/L)	GLY (g/L)	THR (g/L)	ARG (g/L)	ALA (g/L)
1	0	0.000734521	0.00274489	0.00752764	0.0045118	0.00493694	0.0118806	0.0074935	0.00496186	0.00757196	0	0.10807	0.362655	0.79108	0.659355	0.765989	0.891879	0.892619	0.864355	0.674586
4	10.25	0.00120827	0.00243332	0.00686743	0.00323713	0.00492114	0.0120087	0.00713981	0.00387496	0.00563147	10.25	0.177772	0.32149	0.721699	0.473074	0.763538	0.901491	0.850489	0.675018	0.501708
6	13.0833	0.00208015	0.0015266	0.00464759	0.00140663	0.00410624	0.0118816	0.00659124	0.00265588	0.003413	13.0833	0.306053	0.201694	0.488415	0.205564	0.637102	0.89195	0.785143	0.462655	0.304064
8	16.5	0.00188045	1.12592e-05	6.26944e-05	2.8867e-05	0.0019156	0.0110123	0.00513483	0.000272955	0.00105797	16.5	0.276671	0.00148757	0.00658856	0.00421862	0.297214	0.826691	0.611657	0.0475487	0.0942544
12	25.75	0.000566978	3.07451e-06	7.96763e-06	2.71932e-05	6.13005e-06	0.00226323	0.000663527	8.40274e-06	0.00163342	25.75	0.0834194	0.000406205	0.000837318	0.00397402	0.000951106	0.169901	0.0790388	0.00146376	0.145522
13	38.3333	0.000540039	1.48304e-06	1.99743e-06	4.78226e-06	4.57941e-06	2.56812e-05	1.04916e-05	6.66604e-06	0.000172193	38.3333	0.0794559	0.000195939	0.00020991	0.00069888	0.000710517	0.00192788	0.00124975	0.00116122	0.0153407
14	47.6833	0.000476182	3.22092e-06	3.85754e-06	1.9388e-06	6.83796e-06	1.82109e-05	5.45974e-06	1.11951e-05	7.35068e-05	47.6833	0.0700606	0.000425548	0.000405389	0.000283337	0.00106094	0.0013671	0.000650359	0.00195018	0.00654872
16	54.75	0.000231036	4.88874e-06	2.43606e-06	1.0361e-06	6.76609e-06	1.81654e-05	3.90336e-06	1.49442e-05	3.21757e-05	54.75	0.0339924	0.0006459	0.000256006	0.000151416	0.00104979	0.00136368	0.000464966	0.00260328	0.00286653
17	72.75	0.000145284	5.95991e-06	3.14932e-06	8.93901e-07	7.49232e-06	2.08921e-05	7.58901e-06	1.96042e-05	6.31728e-05	72.75	0.0213756	0.000787423	0.000330962	0.000130635	0.00116247	0.00156837	0.000903997	0.00341506	0.00562807
18	79.25	0.000147027	7.51796e-06	5.28184e-06	7.71594e-07	8.52107e-06	2.60868e-05	1.05965e-05	2.53499e-05	0.000123074	79.25	0.0216321	0.000993272	0.000555069	0.000112761	0.00132208	0.00195834	0.00126225	0.00441594	0.0109647
BR4	Sample Label; 8##
Sample #	Time (hours)	GLU (mol/L)	ASN (mol/L)	SER (mol/L)	GLN (mol/L)	HIS (mol/L)	GLY (mol/L)	THR (mol/L)	ARG (mol/L)	ALA (mol/L)	Time (hours)	GLU (g/L)	ASN (g/L)	SER (g/L)	GLN (g/L)	HIS (g/L)	GLY (g/L)	THR (g/L)	ARG (g/L)	ALA (g/L)
1	0	0.000369049	0.0031467	0.00869813	0.00538773	0.00560932	0.0126154	0.00798025	0.00545757	0.00858469	0	0.0542982	0.415742	0.914086	0.787363	0.870313	0.947038	0.950601	0.95071	0.76481
4	10.25	0.00107719	0.00290644	0.00815541	0.0041704	0.00556579	0.0130883	0.00795288	0.00468863	0.00720939	10.25	0.158486	0.383998	0.857052	0.609463	0.863558	0.982542	0.94734	0.816759	0.642284
6	13.0833	0.00222293	0.00152095	0.00473095	0.00137166	0.00417239	0.0120067	0.00671328	0.00245052	0.0035431	13.0833	0.32706	0.200947	0.497176	0.200455	0.647366	0.901339	0.79968	0.426881	0.315655
8	16.5	0.00239181	1.29698e-05	7.49713e-05	3.95517e-05	0.00175158	0.0107862	0.00534427	0.000143748	0.00124909	16.5	0.351907	0.00171357	0.00787873	0.00578009	0.271766	0.809718	0.636605	0.025041	0.111281
12	25.75	0.000574975	2.09537e-06	4.4202e-06	2.08534e-05	5.49589e-06	0.00151127	0.00093507	6.42985e-06	0.00141776	25.75	0.0845961	0.000276841	0.000464519	0.00304751	0.000852713	0.113451	0.111385	0.00112008	0.126308
13	38.3333	0.000679562	2.60414e-06	2.04666e-06	4.27368e-06	4.89279e-06	4.96946e-05	3.10633e-05	6.37341e-06	0.000176721	38.3333	0.099984	0.000344059	0.000215083	0.000624556	0.000759138	0.00373058	0.00370024	0.00111025	0.015744
14	47.6833	0.000734424	3.54553e-06	1.82224e-06	5.05046e-06	6.67057e-06	2.06807e-05	8.59782e-06	1.09765e-05	0.000192617	47.6833	0.108056	0.000468435	0.000191499	0.000738074	0.00103497	0.0015525	0.00102417	0.0019121	0.0171602
16	54.75	0.000670405	4.43102e-06	3.75611e-06	1.73535e-06	9.54156e-06	1.94217e-05	7.70055e-06	1.3209e-05	9.00967e-05	54.75	0.0986367	0.000585426	0.00039473	0.000253604	0.00148042	0.00145799	0.000917284	0.00230101	0.00802672
17	72.75	0.000247941	4.23282e-06	3.44012e-06	1.15983e-06	8.25235e-06	2.2489e-05	9.07512e-06	1.91016e-05	0.000103588	72.75	0.0364795	0.00055924	0.000361522	0.000169497	0.00128039	0.00168825	0.00108102	0.00332749	0.00922866
18	79.25	0.000533791	1.67238e-05	3.87229e-05	3.91493e-06	1.63095e-05	9.89347e-05	5.24635e-05	9.19312e-05	0.000606887	79.25	0.0785366	0.00220954	0.00406939	0.000572128	0.00253049	0.00742703	0.00624941	0.0160144	0.0540675

## Sheet: Table3
Organic acid analysis
Post-processed data for Sartorius fermentation of Streptomyces hygroscopicus NRRL 30429 (08/2018); SH5-SH8
BR2 has 10 additional data points which can be found in 'OA_Processed_Data' of this workbook
AVG
Sample #	Time (hours)	Pyruvate (M)	Glucose (M)	Acetate (UV) (M)	Time (hours)	Pyruvate (g/L)	Glucose (g/L)	Acetate (UV) (g/L)
1	0	0.00111155	0.213403	0.00109732	0	0.0978835	38.4459	0.0647903
4	10.25	0.00302944	0.215957	0.00104568	10.25	0.266772	38.9059	0.0617411
6	13.0833	0.00579691	0.211397	0.00196078	13.0833	0.510476	38.0844	0.115772
8	16.5	0.00966883	0.20656	0.00307171	16.5	0.851437	37.213	0.181366
12	25.75	0.0097713	0.18599	0.00412143	25.75	0.860461	33.5072	0.243346
13	38.3333	0.00775484	0.150711	0.00347847	38.3333	0.682891	27.1516	0.205383
14	47.6833	0.00918422	0.118954	0.00293064	47.6833	0.808762	21.4303	0.173037
16	54.75	0.0122614	0.0965306	0.00309408	54.75	1.07974	17.3906	0.182687
17	72.75	0.0219245	0.0469711	0.00282953	72.75	1.93067	8.46213	0.167067
18	79.25	0.0221423	0.0373748	0.0026512	79.25	1.94985	6.7333	0.156537
SE
Sample #	Time (hours)	Pyruvate (M)	Glucose (M)	Acetate (UV) (M)	Time (hours)	Pyruvate (g/L)	Glucose (g/L)	Acetate (UV) (g/L)
1	0	0.000435174	0.000476146	0.000415569	0	0.0383214	0.0857806	0.0245369
4	10.25	0.000356703	0.000564426	6.76722e-05	0	0.0314113	0.101685	0.00399564
6	13.0833	0.00043066	0.00293809	9.61163e-05	0	0.0379239	0.529314	0.00567509
8	16.5	0.000693081	0.00250737	0.000277059	0	0.0610327	0.451718	0.0163587
12	25.75	0.00109247	0.00104738	0.000392088	0	0.0962033	0.188691	0.0231504
13	38.3333	0.000671645	0.0052054	0.000930725	0	0.0591451	0.937783	0.0549537
14	47.6833	0.00233683	0.0058013	0.00117543	0	0.205781	1.04514	0.069402
16	54.75	0.00312562	0.00412532	0.00152242	0	0.275242	0.743201	0.0898899
17	72.75	0.00529645	0.00834324	0.00173242	0	0.466406	1.50308	0.102289
18	79.25	0.00562654	0.0101957	0.00141438	0	0.495473	1.83681	0.0835109
BR2	Sample Label; 6##
Sample #	Time (hours)	Pyruvate (2° ax.) (mol/L)	Glucose (mol/L)	Acetate (UV) (2° ax.) (mol/L)	Time (hours)	Pyruvate (2° ax.) (g/L)	Glucose (g/L)	Acetate (UV) (2° ax.) (g/L)
1	0	0.000446228	0.212498	0.000471452	0	0.0392948	38.2828	0.0278364
4	10.25	0.00299158	0.21618	0.00109861	10.25	0.263438	38.9461	0.0648664
6	13.0833	0.00517455	0.216768	0.00207927	13.0833	0.455671	39.0521	0.122769
8	16.5	0.00891432	0.210592	0.00348033	16.5	0.784995	37.9393	0.205493
12	25.75	0.00857483	0.187926	0.00483792	25.75	0.755099	33.8561	0.28565
13	38.3333	0.00908687	0.159356	0.00512008	38.3333	0.800189	28.709	0.30231
14	47.6833	0.0135394	0.129029	0.0046289	47.6833	1.19228	23.2453	0.273309
16	54.75	0.0143784	0.100543	0.00574393	54.75	1.26616	18.1134	0.339144
17	72.75	0.031042	0.0353046	0.00626797	72.75	2.73356	6.36034	0.370086
18	79.25	0.0314246	0.0222974	0.00545535	79.25	2.76725	4.017	0.322106
BR1	Sample Label; 5##
Sample #	Time (hours)	Pyruvate (mol/L)	Glucose (mol/L)	Acetate (UV) (mol/L)	Time (hours)	Pyruvate (g/L)	Glucose (g/L)	Acetate (UV) (g/L)
1	0	0.00193015	0.2136	0.00188387	0	0.169969	38.4813	0.111231
4	10.25	0.00366533	0.214887	0.00112709	10.25	0.322769	38.7131	0.0665479
6	13.0833	0.00662375	0.210774	0.00177044	13.0833	0.583288	37.9722	0.104534
8	16.5	0.0110531	0.201961	0.00254328	16.5	0.973337	36.3846	0.150165
12	25.75	0.0119528	0.185714	0.00348718	25.75	1.05257	33.4575	0.205897
13	38.3333	0.00723919	0.141365	0.00189767	38.3333	0.637483	25.4678	0.112046
14	47.6833	0.00847516	0.108932	0.000673737	47.6833	0.746323	19.6248	0.0397801
16	54.75	0.0162968	0.088281	0.000470295	54.75	1.4351	15.9044	0.0277681
17	72.75	0.0220359	0.0424725	0.00074057	72.75	1.94048	7.65167	0.0437262
18	79.25	0.0230106	0.0330242	0.000926658	79.25	2.02631	5.9495	0.0547136
BR4	Sample Label; 8##
Sample #	Time (hours)	Pyruvate (mol/L)	Glucose (mol/L)	Acetate (UV) (mol/L)	Time (hours)	Pyruvate (g/L)	Glucose (g/L)	Acetate (UV) (g/L)
1	0	0.000958281	0.214112	0.000936645	0	0.0843862	38.5736	0.0553033
4	10.25	0.00243141	0.216803	0.000911338	10.25	0.21411	39.0584	0.053809
6	13.0833	0.00559244	0.206648	0.00203262	13.0833	0.49247	37.2288	0.120014
8	16.5	0.00903904	0.207127	0.00319153	16.5	0.795978	37.3151	0.188441
12	25.75	0.00878624	0.18433	0.0040392	25.75	0.773716	33.2081	0.238491
13	38.3333	0.00693847	0.151413	0.00341767	38.3333	0.611002	27.2779	0.201793
14	47.6833	0.00553809	0.118902	0.00348929	47.6833	0.487684	21.4209	0.206022
16	54.75	0.00610907	0.100768	0.00306802	54.75	0.537965	18.154	0.181148
17	72.75	0.0126956	0.0631363	0.00148006	72.75	1.11797	11.3744	0.0873886
18	79.25	0.0119918	0.056803	0.00157158	79.25	1.056	10.2334	0.0927922

## Sheet: Table4
Chemically defined media for S. hygroscopicus NRRL 30439 fermentations
Trace Elements	Concentration (mg/L)
FeSO4.7H20	10
Fe(NO3)3.9H2O	1
K2HPO4	200
KH2PO4	1000
MgSO4.7H2O	1000
MnSO4.H2O	0.056
NaHCO3	2500
Na2HPO4	7350
NaH2PO4.2H2O	18.06
CaCl2.H2O	0.034
Amino Acids	Concentration (mg/L)
Alanine	1000
Arginine	1000
Asparagine	1000
Glutamine	1000
Glycine	1000
Histidine	1000
Serine	1000
Threonine	1000
Sugar	Concentration (mg/L)
Glucose	40000
Nucleotides	Concentration (mg/L)
Into 10 mL of 0.5M NaOH
Uridine	50
Adenine	40
Guanine	40
Uracil	40
Vitamins	Concentration (mg/L)
p-aminobenzoic acid	0.2
Biotin	0.2
Folic acid	0.8
Niacinamide	1
B-NAD	2.5
Pantothenate Ca Salt	2
Pyridoxal hydrochloride	1
Pyridoxamine hydrochloride	1
Riboflavin	2
Thiamine hydrochloride	1
Vitamin B12	0.1
Inositol	2
Nicotonic acid	1

## Sheet: Table5
Organic Acid Analysis
Post-processed data for Sartorius fermentation of Streptomyces hygroscopicus NRRL 30429 (08/2018); SH5-SH8
Supernatent samples were analyzed at a 1:3 dilution [1:2 sample:dH2O]
BR2	Sample Label; 6##
Sample #	Time (hours)	Pyruvate (2° ax.) (mol/L)	Glucose (mol/L)	Acetate (UV) (2° ax.) (mol/L)	Time (hours)	Pyruvate (2° ax.) (g/L)	Glucose (g/L)	Acetate (UV) (2° ax.) (g/L)
1	0	0.000446228	0.212498	0.000471452	0	0.0392948	38.2828	0.0278364
2	5.75	0.000994711	0.217066	0.000486289	5.75	0.0875942	39.1057	0.0287124
3	7.75	0.00142305	0.210749	0.00062168	7.75	0.125313	37.9678	0.0367064
4	10.25	0.00299158	0.21618	0.00109861	10.25	0.263438	38.9461	0.0648664
5	11.5	0.00400382	0.216372	0.00161926	11.5	0.352577	38.9807	0.0956074
6	13.0833	0.00517455	0.216768	0.00207927	13.0833	0.455671	39.0521	0.122769
7	14.8333	0.00694504	0.214973	0.0030346	14.8333	0.61158	38.7286	0.179175
8	16.5	0.00891432	0.210592	0.00348033	16.5	0.784995	37.9393	0.205493
9	18.25	0.00911584	0.20422	0.00368606	18.25	0.802741	36.7915	0.21764
10	19.5833	0.00953429	0.202192	0.00387003	19.5833	0.83959	36.4262	0.228502
11	22.25	0.00929956	0.194964	0.0038039	22.25	0.818919	35.1239	0.224598
12	25.75	0.00857483	0.187926	0.00483792	25.75	0.755099	33.8561	0.28565
13	38.3333	0.00908687	0.159356	0.00512008	38.3333	0.800189	28.709	0.30231
14	47.6833	0.0135394	0.129029	0.0046289	47.6833	1.19228	23.2453	0.273309
15	49.6667	0.0141251	0.119932	0.0055736	49.6667	1.24385	21.6064	0.329088
16	54.75	0.0143784	0.100543	0.00574393	54.75	1.26616	18.1134	0.339144
17	72.75	0.031042	0.0353046	0.00626797	72.75	2.73356	6.36034	0.370086
18	79.25	0.0314246	0.0222974	0.00545535	79.25	2.76725	4.017	0.322106
19	99.5833	0.028501	0.000532978	0.00687067	99.5833	2.5098	0.0960192	0.405672
20	127.75	0.0147076	0.000452762	0.00851663	127.75	1.29515	0.0815678	0.502856
BR1	Sample Label; 5##
Sample #	Time (hours)	Pyruvate (mol/L)	Glucose (mol/L)	Acetate (UV) (mol/L)	Time (hours)	Pyruvate (g/L)	Glucose (g/L)	Acetate (UV) (g/L)
1	0	0.00193015	0.2136	0.00188387	0	0.169969	38.4813	0.111231
4	10.25	0.00366533	0.214887	0.00112709	10.25	0.322769	38.7131	0.0665479
6	13.0833	0.00662375	0.210774	0.00177044	13.0833	0.583288	37.9722	0.104534
8	16.5	0.0110531	0.201961	0.00254328	16.5	0.973337	36.3846	0.150165
12	25.75	0.0119528	0.185714	0.00348718	25.75	1.05257	33.4575	0.205897
13	38.3333	0.00723919	0.141365	0.00189767	38.3333	0.637483	25.4678	0.112046
14	47.6833	0.00847516	0.108932	0.000673737	47.6833	0.746323	19.6248	0.0397801
16	54.75	0.0162968	0.088281	0.000470295	54.75	1.4351	15.9044	0.0277681
17	72.75	0.0220359	0.0424725	0.00074057	72.75	1.94048	7.65167	0.0437262
18	79.25	0.0230106	0.0330242	0.000926658	79.25	2.02631	5.9495	0.0547136
BR4	Sample Label; 8##
Sample #	Time (hours)	Pyruvate (mol/L)	Glucose (mol/L)	Acetate (UV) (mol/L)	Time (hours)	Pyruvate (g/L)	Glucose (g/L)	Acetate (UV) (g/L)
1	0	0.000958281	0.214112	0.000936645	0	0.0843862	38.5736	0.0553033
4	10.25	0.00243141	0.216803	0.000911338	10.25	0.21411	39.0584	0.053809
6	13.0833	0.00559244	0.206648	0.00203262	13.0833	0.49247	37.2288	0.120014
8	16.5	0.00903904	0.207127	0.00319153	16.5	0.795978	37.3151	0.188441
12	25.75	0.00878624	0.18433	0.0040392	25.75	0.773716	33.2081	0.238491
13	38.3333	0.00693847	0.151413	0.00341767	38.3333	0.611002	27.2779	0.201793
14	47.6833	0.00553809	0.118902	0.00348929	47.6833	0.487684	21.4209	0.206022
16	54.75	0.00610907	0.100768	0.00306802	54.75	0.537965	18.154	0.181148
17	72.75	0.0126956	0.0631363	0.00148006	72.75	1.11797	11.3744	0.0873886
18	79.25	0.0119918	0.056803	0.00157158	79.25	1.056	10.2334	0.0927922

## Sheet: Table6
Amino Acid Analysis
Post-processed data for Sartorius fermentation of Streptomyces hygroscopicus NRRL 30439 (08/2018); SH5-SH8
Supernatent samples were analyzed at a 1:30 dilution [1:14 sample:dH2O, then 1:1 dil. Sample:iRSTD]
BR2	Sample Label; 6##
Sample #	Time (hours)	GLU (2° Ax.) (mol/L)	ASN (mol/L)	SER (mol/L)	GLN (mol/L)	HIS (mol/L)	GLY (mol/L)	THR (mol/L)	ARG (mol/L)	ALA (mol/L)	Time (hours)	GLU (2° Ax.) (g/L)	ASN (g/L)	SER (g/L)	GLN (g/L)	HIS (g/L)	GLY (g/L)	THR (g/L)	ARG (g/L)	ALA (g/L)
1	0	0.000168328	0.00322756	0.00903757	0.00563531	0.00574921	0.0126223	0.00788292	0.00546468	0.00881806	0	0.0247661	0.426426	0.949758	0.823544	0.892016	0.947554	0.939007	0.951947	0.785601
2	5.75	0.000446175	0.00342018	0.00961012	0.00559623	0.00619742	0.0138392	0.00853422	0.00570057	0.00891929	5.75	0.0656457	0.451874	1.00993	0.817833	0.961559	1.03891	1.01659	0.99304	0.79462
3	7.75	0.000608455	0.00296258	0.00834843	0.00461894	0.00539962	0.0125991	0.00759895	0.0048139	0.00759201	7.75	0.089522	0.391416	0.877337	0.675012	0.837776	0.945814	0.90518	0.838581	0.676373
4	10.25	0.00135815	0.00306185	0.0086784	0.00419037	0.00623898	0.0150867	0.00940224	0.00519871	0.00721072	10.25	0.199824	0.404532	0.912013	0.612381	0.968006	1.13256	1.11999	0.905615	0.642403
5	11.5	0.00153429	0.00234344	0.00678323	0.00287016	0.00513034	0.0128386	0.00744816	0.00400224	0.00535344	11.5	0.225741	0.309616	0.71285	0.419445	0.795995	0.963797	0.887219	0.697191	0.476938
6	13.0833	0.00191231	0.00183361	0.0054904	0.00188397	0.00459808	0.0125964	0.00709235	0.00344773	0.00420783	13.0833	0.281358	0.242257	0.576986	0.275323	0.713413	0.945612	0.844835	0.600595	0.374876
7	14.8333	0.00262605	0.00100674	0.00347969	0.000696568	0.00400262	0.0128232	0.00691808	0.00279218	0.00292526	14.8333	0.386371	0.13301	0.36568	0.101796	0.621024	0.962637	0.824076	0.486397	0.260611
8	16.5	0.00252958	4.67001e-05	0.000414942	3.87169e-05	0.00261795	0.0113351	0.0057261	0.00155488	0.00153835	16.5	0.372178	0.00617001	0.0436063	0.00565809	0.406187	0.850923	0.682089	0.270861	0.137052
9	18.25	0.00166695	3.43356e-06	2.60877e-05	2.11637e-05	0.00109838	0.00969726	0.00475111	0.000631788	0.00120505	18.25	0.245258	0.000453642	0.00274156	0.00309286	0.170419	0.727974	0.565949	0.110057	0.107358
10	19.5833	0.00106794	2.19321e-06	9.35832e-06	1.80032e-05	0.000168247	0.00823986	0.00409853	2.42798e-05	0.00131971	19.5833	0.157126	0.000289767	0.000983466	0.00263099	0.0261043	0.618566	0.488214	0.00422955	0.117573
11	22.25	0.000649497	2.4712e-06	6.48765e-06	1.77317e-05	9.21275e-06	0.00554609	0.00279965	4.87395e-06	0.0015203	22.25	0.0955605	0.000326495	0.000681787	0.00259132	0.0014294	0.416345	0.333492	0.000849042	0.135443
12	25.75	0.000616458	2.0735e-06	7.09129e-06	2.23471e-05	4.92682e-06	0.00222561	0.00159531	6.84904e-06	0.00185473	25.75	0.0906995	0.00027395	0.000745223	0.0032658	0.000764419	0.167077	0.190032	0.0011931	0.165238
13	38.3333	0.000415634	2.8329e-06	2.81196e-06	8.35557e-06	5.02795e-06	0.000161154	0.000124821	5.29821e-06	0.000465825	38.3333	0.0611522	0.000374283	0.000295509	0.00122108	0.00078011	0.0120979	0.0148685	0.000922948	0.0415003
14	47.6833	0.000515523	4.12687e-06	4.5384e-06	1.07542e-05	5.16844e-06	2.15361e-05	1.53518e-05	5.00747e-06	0.000519746	47.6833	0.0758489	0.000545243	0.000476941	0.00157162	0.000801907	0.00161671	0.0018287	0.000872301	0.0463042
15	49.6667	0.000532876	3.65356e-06	4.69246e-06	9.97711e-06	4.48566e-06	2.59434e-05	1.65397e-05	4.30835e-06	0.000527729	49.6667	0.0784021	0.000482708	0.00049313	0.00145806	0.000695971	0.00194757	0.0019702	0.000750514	0.0470154
16	54.75	0.000675317	3.59603e-06	2.54874e-06	4.40009e-06	7.15285e-06	3.83865e-05	4.25613e-05	7.64016e-06	0.000757107	54.75	0.0993593	0.000475107	0.000267847	0.00064303	0.0011098	0.00288167	0.00506987	0.00133092	0.0674507
17	72.75	0.000245244	7.39642e-06	3.73282e-06	1.71193e-06	1.25088e-05	2.7576e-05	1.21451e-05	2.55277e-05	0.000412448	72.75	0.0360828	0.000977216	0.000392282	0.000250182	0.00194079	0.00207013	0.00144671	0.00444693	0.036745
18	79.25	0.000196199	7.51446e-06	1.73787e-06	5.06886e-07	1.19311e-05	2.10605e-05	8.14286e-06	2.78497e-05	6.26513e-05	79.25	0.0288668	0.000992811	0.000182633	7.40764e-05	0.00185116	0.00158101	0.000969971	0.00485142	0.00558161
19	99.5833	0.000138977	8.50415e-06	4.85992e-06	5.89173e-07	1.13581e-05	3.14056e-05	1.50593e-05	4.56416e-05	0.00019941	99.5833	0.0204477	0.00112357	0.000510729	8.61018e-05	0.00176226	0.00235762	0.00179386	0.00795077	0.0177654
20	127.75	0.000140623	1.50611e-05	9.21312e-06	9.71319e-07	8.79278e-06	4.29108e-05	2.38231e-05	5.90317e-05	0.000279888	127.75	0.0206899	0.00198987	0.000968207	0.000141949	0.00136424	0.00322131	0.00283778	0.0102833	0.0249352
BR1
Sample #	Time (hours)	GLU (mol/L)	ASN (mol/L)	SER (mol/L)	GLN (mol/L)	HIS (mol/L)	GLY (mol/L)	THR (mol/L)	ARG (mol/L)	ALA (mol/L)	Time (hours)	GLU (g/L)	ASN (g/L)	SER (g/L)	GLN (g/L)	HIS (g/L)	GLY (g/L)	THR (g/L)	ARG (g/L)	ALA (g/L)
1	0	0.000734521	0.00274489	0.00752764	0.0045118	0.00493694	0.0118806	0.0074935	0.00496186	0.00757196	0	0.10807	0.362655	0.79108	0.659355	0.765989	0.891879	0.892619	0.864355	0.674586
4	10.25	0.00120827	0.00243332	0.00686743	0.00323713	0.00492114	0.0120087	0.00713981	0.00387496	0.00563147	10.25	0.177772	0.32149	0.721699	0.473074	0.763538	0.901491	0.850489	0.675018	0.501708
6	13.0833	0.00208015	0.0015266	0.00464759	0.00140663	0.00410624	0.0118816	0.00659124	0.00265588	0.003413	13.0833	0.306053	0.201694	0.488415	0.205564	0.637102	0.89195	0.785143	0.462655	0.304064
8	16.5	0.00188045	1.12592e-05	6.26944e-05	2.8867e-05	0.0019156	0.0110123	0.00513483	0.000272955	0.00105797	16.5	0.276671	0.00148757	0.00658856	0.00421862	0.297214	0.826691	0.611657	0.0475487	0.0942544
12	25.75	0.000566978	3.07451e-06	7.96763e-06	2.71932e-05	6.13005e-06	0.00226323	0.000663527	8.40274e-06	0.00163342	25.75	0.0834194	0.000406205	0.000837318	0.00397402	0.000951106	0.169901	0.0790388	0.00146376	0.145522
13	38.3333	0.000540039	1.48304e-06	1.99743e-06	4.78226e-06	4.57941e-06	2.56812e-05	1.04916e-05	6.66604e-06	0.000172193	38.3333	0.0794559	0.000195939	0.00020991	0.00069888	0.000710517	0.00192788	0.00124975	0.00116122	0.0153407
14	47.6833	0.000476182	3.22092e-06	3.85754e-06	1.9388e-06	6.83796e-06	1.82109e-05	5.45974e-06	1.11951e-05	7.35068e-05	47.6833	0.0700606	0.000425548	0.000405389	0.000283337	0.00106094	0.0013671	0.000650359	0.00195018	0.00654872
16	54.75	0.000231036	4.88874e-06	2.43606e-06	1.0361e-06	6.76609e-06	1.81654e-05	3.90336e-06	1.49442e-05	3.21757e-05	54.75	0.0339924	0.0006459	0.000256006	0.000151416	0.00104979	0.00136368	0.000464966	0.00260328	0.00286653
17	72.75	0.000145284	5.95991e-06	3.14932e-06	8.93901e-07	7.49232e-06	2.08921e-05	7.58901e-06	1.96042e-05	6.31728e-05	72.75	0.0213756	0.000787423	0.000330962	0.000130635	0.00116247	0.00156837	0.000903997	0.00341506	0.00562807
18	79.25	0.000147027	7.51796e-06	5.28184e-06	7.71594e-07	8.52107e-06	2.60868e-05	1.05965e-05	2.53499e-05	0.000123074	79.25	0.0216321	0.000993272	0.000555069	0.000112761	0.00132208	0.00195834	0.00126225	0.00441594	0.0109647
BR4	Sample Label; 8##
Sample #	Time (hours)	GLU (mol/L)	ASN (mol/L)	SER (mol/L)	GLN (mol/L)	HIS (mol/L)	GLY (mol/L)	THR (mol/L)	ARG (mol/L)	ALA (mol/L)	Time (hours)	GLU (g/L)	ASN (g/L)	SER (g/L)	GLN (g/L)	HIS (g/L)	GLY (g/L)	THR (g/L)	ARG (g/L)	ALA (g/L)
1	0	0.000369049	0.0031467	0.00869813	0.00538773	0.00560932	0.0126154	0.00798025	0.00545757	0.00858469	0	0.0542982	0.415742	0.914086	0.787363	0.870313	0.947038	0.950601	0.95071	0.76481
4	10.25	0.00107719	0.00290644	0.00815541	0.0041704	0.00556579	0.0130883	0.00795288	0.00468863	0.00720939	10.25	0.158486	0.383998	0.857052	0.609463	0.863558	0.982542	0.94734	0.816759	0.642284
6	13.0833	0.00222293	0.00152095	0.00473095	0.00137166	0.00417239	0.0120067	0.00671328	0.00245052	0.0035431	13.0833	0.32706	0.200947	0.497176	0.200455	0.647366	0.901339	0.79968	0.426881	0.315655
8	16.5	0.00239181	1.29698e-05	7.49713e-05	3.95517e-05	0.00175158	0.0107862	0.00534427	0.000143748	0.00124909	16.5	0.351907	0.00171357	0.00787873	0.00578009	0.271766	0.809718	0.636605	0.025041	0.111281
12	25.75	0.000574975	2.09537e-06	4.4202e-06	2.08534e-05	5.49589e-06	0.00151127	0.00093507	6.42985e-06	0.00141776	25.75	0.0845961	0.000276841	0.000464519	0.00304751	0.000852713	0.113451	0.111385	0.00112008	0.126308
13	38.3333	0.000679562	2.60414e-06	2.04666e-06	4.27368e-06	4.89279e-06	4.96946e-05	3.10633e-05	6.37341e-06	0.000176721	38.3333	0.099984	0.000344059	0.000215083	0.000624556	0.000759138	0.00373058	0.00370024	0.00111025	0.015744
14	47.6833	0.000734424	3.54553e-06	1.82224e-06	5.05046e-06	6.67057e-06	2.06807e-05	8.59782e-06	1.09765e-05	0.000192617	47.6833	0.108056	0.000468435	0.000191499	0.000738074	0.00103497	0.0015525	0.00102417	0.0019121	0.0171602
16	54.75	0.000670405	4.43102e-06	3.75611e-06	1.73535e-06	9.54156e-06	1.94217e-05	7.70055e-06	1.3209e-05	9.00967e-05	54.75	0.0986367	0.000585426	0.00039473	0.000253604	0.00148042	0.00145799	0.000917284	0.00230101	0.00802672
17	72.75	0.000247941	4.23282e-06	3.44012e-06	1.15983e-06	8.25235e-06	2.2489e-05	9.07512e-06	1.91016e-05	0.000103588	72.75	0.0364795	0.00055924	0.000361522	0.000169497	0.00128039	0.00168825	0.00108102	0.00332749	0.00922866
18	79.25	0.000533791	1.67238e-05	3.87229e-05	3.91493e-06	1.63095e-05	9.89347e-05	5.24635e-05	9.19312e-05	0.000606887	79.25	0.0785366	0.00220954	0.00406939	0.000572128	0.00253049	0.00742703	0.00624941	0.0160144	0.0540675
A citrulline standard was not used, and is therefore not quantifiable
No Standard for Citrulline quantification
		Citrulline BR1	Citrulline BR4	Citrulline BR3	Mean	SE
1	0	0.352423	0.172054	0.0576181	0.194032	0.0858093
4	10.25	1.03607	0.850208	1.37927	1.08852	0.154961
6	13.0833	2.13629	2.66657	2.1988	2.33389	0.167316
8	16.5	3.40235	3.37177	3.46009	3.4114	0.0258956
12	25.75	1.43354	1.80002	2.8625	2.03202	0.428505
13	38.3333	0.367975	0.411403	1.02783	0.602402	0.213082
14	47.6833	0.13219	0.911324	1.60624	0.88325	0.425752
16	54.75	0.144663	0.428751	4.0923	1.55524	1.27118
17	72.75	0.174609	0.276777	0.353251	0.268212	0.0517471
18	79.25	0.186248	0.34087	0.183999	0.237039	0.0519196
Sample #	Time (hours)
	Sample	ASP|Amount	GLU|Amount	ASN|Amount	SER|Amount	GLN|Amount	HIS|Amount	GLY|Amount	THR|Amount	Citrulline|NQ	ARG|Amount	ALA|Amount	GABA|Amount	TYR|Amount	MET|Amount	TRP|Amount	PHE|Amount	ILE|Amount	LYS|Amount
1	CG-101	0.304868	5.61094	107.585	301.252	187.844	191.64	420.742	262.764	0.0576181	182.156	293.935	0.212629	0	0	0	0	0	4.50484
2	CG-102	0.497673	14.8725	114.006	320.337	186.541	206.581	461.306	284.474	0.234448	190.019	297.31	1.14011	0	0	0	0	0.0548075	5.03558
3	CG-103	0.562486	20.2818	98.7526	278.281	153.965	179.987	419.97	253.298	0.363545	160.463	253.067	1.41832	0	0	0	0	0.0540282	4.4972
4	CG-104	0.981281	45.2715	102.062	289.28	139.679	207.966	502.89	313.408	1.37927	173.29	240.357	3.48791	0	0	0	0	0.0492772	5.47393
5	CG-105	1.04081	51.1431	78.1147	226.108	95.6719	171.011	427.955	248.272	1.74322	133.408	178.448	4.0501	0	0	0	0	0.0298088	4.32724
6	CG-106	1.14436	63.7436	61.1205	183.013	62.799	153.269	419.88	236.412	2.1988	114.924	140.261	4.86026	0	0	0	0	0.0389506	3.96614
7	CG-107	1.4857	87.535	33.5579	115.99	23.2189	133.421	427.44	230.603	3.41199	93.0725	97.5087	6.55647	0	0	0	0	0.0878193	3.57553
8	CG-108	1.42472	84.3195	1.55667	13.8314	1.29056	87.2649	377.835	190.87	3.46009	51.8295	51.2784	3.53257	0	0	0	0	0.167781	2.19805
9	CG-109	1.14501	55.5648	0.114452	0.86959	0.705456	36.6127	323.242	158.37	3.31749	21.0596	40.1684	1.94847	0	0	0	0	1.65248	0
10	CG-110	0.745882	35.5979	0.073107	0.311944	0.600108	5.60824	274.662	136.618	2.86125	0.809328	43.9904	1.61484	0	0	0	0	3.29389	0
11	CG-111	0.172365	21.6499	0.0823732	0.216255	0.591058	0.307092	184.87	93.3216	3.38857	0.162465	50.6766	1.13483	0	0	0	0	4.26093	0.245775
12	CG-112	0.0738285	20.5486	0.0691165	0.236376	0.744902	0.164227	74.187	53.177	2.8625	0.228301	61.8244	0.912621	0	0	0	0	4.75857	0.2351
13	CG-113	0.266188	13.8545	0.09443	0.0937319	0.278519	0.167598	5.37182	4.16069	1.02783	0.176607	15.5275	0.290263	0	0	0.0673072	0	0.230011	0.235508
14	CG-114	0.51041	17.1841	0.137562	0.15128	0.358475	0.172281	0.717869	0.511727	1.60624	0.166916	17.3249	0.0930568	0	0	0.0449873	0	0.273021	0.327364
15	CG-115	0.525263	17.7625	0.121785	0.156415	0.33257	0.149522	0.86478	0.551325	1.97722	0.143612	17.591	0.0959205	0	0	0.0343567	0	0.105838	0.307431
16	CG-116	0.968776	22.5106	0.119868	0.0849579	0.14667	0.238428	1.27955	1.41871	4.0923	0.254672	25.2369	0.152022	0.110557	0	0.0548352	0.0976863	0.0688866	0.62802
17	CG-117	0.622539	8.1748	0.246547	0.124427	0.0570644	0.416959	0.919201	0.404836	0.353251	0.850925	13.7483	0.198532	0.304442	0.212291	0.142598	0.297395	0	1.46599
18	CG-118	0.747831	6.53997	0.250482	0.0579289	0.0168962	0.397703	0.702016	0.271429	0.183999	0.928324	2.08838	0.0617049	0.325288	0.239976	0.135462	0.315439	0	1.56082
19	CG-119	1.2842	4.63257	0.283472	0.161997	0.0196391	0.378603	1.04685	0.501978	0.584832	1.52139	6.647	0.0516319	0.488031	0.309526	0.181903	0.48473	0	1.98292
20	CG-120	1.6023	4.68745	0.502037	0.307104	0.0323773	0.293093	1.43036	0.794102	1.05148	1.96772	9.3296	0.0308801	0.615896	0.357859	0.241288	0.605571	0	2.52429

## Sheet: Table7
Label-free quantified proteins using Msstats; quantile normalized with tukey's median polish. Cluster memberships (k-means) is also included.
Gene	1	2	3	4	5	6	7	8	9	10	11	12	Cluster
shyg0004	0	0	0	0	0	7.16005	7.04936	0	7.69638	11.9522	11.3958	12.9639	cluster_4
shyg0023	15.5616	16.2218	14.3852	12.2493	6.53194	8.61675	10.2782	11.5136	7.61228	0	0	0	cluster_1
shyg0038	12.8751	15.8188	15.6161	15.2781	16.2223	16.486	16.9021	16.6732	16.4612	15.4525	14.4305	14.4277	cluster_2
shyg0042	0	10.3214	0	9.99838	15.4097	14.6547	14.9062	13.8756	13.4474	14.5826	12.4259	14.179	cluster_4
shyg0053	4.86786	5.32749	4.64693	5.80685	8.16981	7.16629	3.8451	6.49083	5.09089	6.16413	7.60524	5.97096	cluster_4
shyg0056	0	7.18475	6.17628	0	5.74524	7.44994	6.28818	9.76752	6.89857	9.74046	6.11338	0	cluster_2
shyg0101	0	6.4195	7.67335	0	4.83927	7.41211	7.68719	9.09142	6.01407	0	0	0	cluster_2
shyg0103	0	0	0	0	4.22865	6.1507	6.05068	8.18584	8.93307	12.031	14.8579	13.3192	cluster_4
shyg0111	16.654	13.9221	12.3977	9.11349	9.19186	7.34053	7.94028	10.5433	7.24601	11.6213	12.0361	11.1792	cluster_3
shyg0134	0	0	18.2236	0	16.5627	0	0	16.1957	0	0	0	0	cluster_2
shyg0142	0	0	0	0	0	4.56275	6.57803	7.7871	6.93264	10.4687	11.2985	8.62531	cluster_4
shyg0149	17.4698	15.017	10.7222	8.72063	12.32	11.9876	0	0	11.9951	20.5703	12.0642	0	cluster_3
shyg0178	0	7.30815	5.24637	5.09745	8.95921	7.81562	7.32735	8.23708	7.2809	7.02507	0	0	cluster_2
shyg0188	13.1435	7.91478	9.46495	0	7.54553	0	0	0	0	0	0	0	cluster_1
shyg0194	0	7.61356	0	6.17812	7.57451	8.63219	10.2731	12.3656	12.7018	13.94	14.0744	14.5309	cluster_4
shyg0219	0	0	0	0	0	2.47423	5.02769	8.47219	8.97429	12.2398	14.3534	12.8775	cluster_4
shyg0232	0	14.2438	0	13.0652	14.2691	15.5829	16.2697	0	16.8291	0	17.7976	18.1464	cluster_4
shyg0242	16.2646	9.6208	7.88158	0	0	0	0	0	0	0	0	0	cluster_3
shyg0324	0	0	0	0	0	0	0	0	0	10.2735	7.14679	0	cluster_4
shyg0325	15.8431	11.5245	7.50787	3.71769	5.99401	4.3321	6.52739	8.14504	4.77236	8.99537	11.8787	11.5528	cluster_3
shyg0335	4.68415	3.55768	3.97257	6.5623	12.4103	13.4622	13.5381	14.3373	14.1252	13.9997	15.1437	15.359	cluster_4
shyg0336	0	9.13015	0	8.61528	13.1784	14.4995	14.9819	15.3962	15.3908	16.4157	16.5656	16.6513	cluster_4
shyg0337	14.1863	15.4259	13.9969	12.8286	17.0059	18.4186	18.6126	18.975	19.3808	19.2692	19.2847	19.702	cluster_4
shyg0338	6.27554	7.35204	7.20387	11.6394	15.5615	16.9937	17.4218	17.7781	18.1293	18.2504	18.7206	18.1388	cluster_4
shyg0339	10.398	10.5366	11.2124	12.1142	15.5673	16.6989	16.8313	16.5909	16.8974	17.0942	17.021	17.1578	cluster_4
shyg0340	0	3.05517	0	4.45031	8.73926	9.2595	9.46092	8.50601	9.44933	10.5557	12.5132	12.0395	cluster_4
shyg0341	6.18799	0	7.18759	10.3084	15.065	15.9078	16.1808	15.9514	15.7391	14.9486	13.6709	12.7361	cluster_4
shyg0342	10.6954	0	7.74791	8.91242	14.2896	15.9511	14.5959	13.8704	12.8106	13.586	12.319	12.5191	cluster_4
shyg0343	7.98355	5.31868	0	11.2587	14.4971	14.0508	14.6516	14.3639	14.2392	14.6166	16.1099	14.7074	cluster_4
shyg0344	8.53485	8.23262	0	10.7938	15.0491	16.3854	16.7918	17.0096	17.5607	17.1309	17.03	17.2479	cluster_4
shyg0345	0	0	0	3.53794	9.83747	12.3263	12.5888	13.1425	14.9237	10.7628	10.9271	10.6782	cluster_4
shyg0362	0	0	6.97729	0	0	0	0	0	11.9441	0	0	0	cluster_2
shyg0364	0	0	0	0	0	0	0	0	11.1837	11.3256	11.4825	10.7465	cluster_4
shyg0365	0	0	6.41768	3.59478	7.77923	9.489	11.3575	12.8252	14.5024	19.3826	15.4145	15.121	cluster_4
shyg0366	0	0	0	9.04506	10.3897	10.5708	11.6852	11.6644	12.7767	14.0514	17.2467	16.0613	cluster_4
shyg0367	0	12.8194	11.4947	12.2699	11.2912	7.5332	11.6139	9.97322	9.77393	13.5472	10.4601	10.5665	cluster_2
shyg0368	0	6.14804	6.27094	1.94412	7.00677	7.3416	7.83942	9.3743	12.3226	13.4241	16.7432	15.2595	cluster_4
shyg0385	18.1766	17.8694	17.7539	17.3548	17.538	17.3106	15.3084	17.0312	7.86182	14.39	0	0	cluster_1
shyg0387	0	6.14814	0	0	7.18484	6.70378	8.80056	8.70764	6.69548	10.2604	11.174	8.37836	cluster_4
shyg0388	15.6765	11.4904	9.51263	11.7944	6.33331	10.6351	8.176	0	8.58927	10.2331	14.0598	15.4878	cluster_3
shyg0394	12.1719	12.078	10.9515	8.77897	8.40597	7.19517	9.98679	11.0953	10.9578	10.9024	11.4036	10.7697	cluster_3
shyg0400	0	0	0	0	0	8.63767	11.334	12.0299	9.1636	11.3294	12.6958	0	cluster_4
shyg0403	0	0	0	0	8.39215	12.2956	11.4776	9.26504	10.638	9.21777	10.532	0	cluster_2
shyg0405	0	5.76114	4.35752	7.42014	9.66198	12.8495	12.9314	12.3952	12.5207	12.1547	11.9329	11.9234	cluster_4
shyg0442	15.0428	12.738	12.1159	8.5525	7.55532	7.53518	0	0	6.96247	0	6.79316	0	cluster_1
shyg0449	8.34806	6.06247	6.66704	0	9.52179	9.4018	11.2104	11.6384	12.2473	12.3609	13.5682	12.9884	cluster_4
shyg0452	15.1558	15.7	0	11.9242	10.3183	13.9449	12.9862	14.6799	13.9161	15.0163	16.038	16.0748	cluster_4
shyg0582	0	0	0	0	0	11.7889	0	13.0732	12.6546	13.8933	13.2817	13.3112	cluster_4
shyg0584	0	0	0	0	9.74566	12.6971	9.47305	9.34038	8.4365	9.57512	11.1513	9.7418	cluster_4
shyg0585	0	0	0	0	9.36971	11.0584	12.2692	0	0	0	0	0	cluster_2
shyg0596	0	0	0	0	7.0276	7.09373	8.6888	8.65227	7.21229	10.5665	11.3521	11.6619	cluster_4
shyg0616	20.3523	19.9205	20.4786	20.2747	21.3197	21.4345	21.6442	21.7271	21.4407	21.059	19.9129	18.2925	cluster_2
shyg0649	0	16.0763	16.1984	8.81055	13.3882	10.3291	12.8577	0	14.9164	13.6772	14.1642	0	cluster_2
shyg0654	0	0	0	0	6.02586	7.1932	8.71044	12.0071	11.8605	12.653	14.3314	14.6903	cluster_4
shyg0668	0	0	5.32345	0	8.87313	3.40799	8.0117	8.91564	9.43411	10.0852	9.88324	11.2393	cluster_4
shyg0694	6.25601	5.06743	5.94125	5.73683	9.14036	12.7589	14.1425	13.9534	11.5297	12.2874	8.7605	11.0512	cluster_4
shyg0695	10.3182	10.9737	11.4182	12.3431	16.202	17.6962	18.1683	18.007	17.5814	17.1002	16.7218	16.9499	cluster_4
shyg0769	0	0	0	0	0	0	0	0	7.92842	17.4861	11.0912	10.2759	cluster_4
shyg0771	0	0	0	0	0	0	0	0	6.30694	13.5168	8.8032	8.9955	cluster_4
shyg0778	0	0	0	0	0	0	0	0	6.52622	9.70957	9.18009	10.4701	cluster_4
shyg0812	0	0	0	5.28685	0	1.77482	7.66204	6.90076	7.60833	8.6812	9.43396	8.30266	cluster_4
shyg0847	0	6.44625	6.35507	3.49082	0	0	0	0	7.78633	18.3836	7.73924	0	cluster_4
shyg0931	0	0	0	17.7613	19.1589	19.4993	19.5274	19.2252	18.6843	18.47	17.9955	16.4252	cluster_4
shyg0932	11.5146	0	0	14.5319	16.9227	17.4305	17.336	17.574	17.5082	17.8093	17.8646	17.92	cluster_4
shyg0943	6.92774	7.46348	5.72405	4.43561	6.08276	6.84049	8.61519	7.17103	5.38926	6.66402	5.44529	4.86175	cluster_2
shyg0944	0	7.52865	12.5404	6.33246	7.20752	10.7684	7.63589	9.67744	8.79599	11.534	11.6955	13.7738	cluster_4
shyg0947	0	0	0	0	11.398	0	0	17.2961	15.238	16.3062	14.2353	17.314	cluster_4
shyg0985	14.7967	7.93272	6.00272	8.69117	9.47004	11.2744	8.94906	11.7827	10.9026	8.42676	4.69275	0	cluster_1
shyg1184	0	8.11427	6.51145	6.55149	9.00946	7.25029	8.349	9.19894	7.64729	9.0737	12.2409	9.64426	cluster_4
shyg1187	0	0	0	0	0	9.05858	0	12.7176	12.7298	14.4077	15.2356	15.8718	cluster_4
shyg1189	0	4.5064	0	4.49032	5.15684	9.8469	11.9457	12.1981	13.24	12.9784	12.033	13.1864	cluster_4
shyg1191	0	0	0	0	0	0	7.7927	0	0	17.7239	7.05576	0	cluster_4
shyg1205	0	0	0	0	0	0	0	7.33034	7.42983	10.3384	11.9438	11.0749	cluster_4
shyg1210	9.96562	6.13258	5.73671	4.65897	8.24369	5.38997	7.19821	9.53738	7.86427	10.851	11.2226	11.8673	cluster_4
shyg1215	0	6.69528	8.36906	6.61052	4.94657	6.3255	6.43545	7.51913	7.71966	9.57064	10.1289	10.683	cluster_4
shyg1251	17.4268	18.4039	0	0	13.418	14.4096	15.4312	0	16.8346	17.099	17.6279	17.6179	cluster_3
shyg1264	14.1419	0	0	0	7.18042	3.26555	0	0	0	0	0	0	cluster_3
shyg1265	13.8228	7.33669	7.57072	4.94155	5.05516	4.22033	6.49962	6.65255	7.12737	6.38858	6.98154	5.6102	cluster_3
shyg1299	0	0	0	0	0	12.4961	7.18157	13.3953	11.7117	14.0697	12.8347	11.3796	cluster_4
shyg1301	0	0	0	7.02582	0	0	0	0	0	16.7641	8.33428	0	cluster_4
shyg1306	0	0	0	11.4993	11.745	9.18393	0	0	0	0	0	0	cluster_2
shyg1308	11.312	10.6007	10.7628	6.06432	5.83868	4.29825	3.47085	7.49286	4.02029	6.11956	7.90177	8.25275	cluster_3
shyg1310	9.07176	10.078	8.4853	10.6738	5.07118	0	7.61643	0	0	0	0	0	cluster_1
shyg1311	9.26085	7.6718	6.22727	7.82467	4.97644	7.91494	7.71692	4.73781	9.63961	5.99921	9.084	5.24336	cluster_3
shyg1324	15.647	16.1343	15.2505	14.4686	12.1902	11.17	11.4139	10.9486	11.156	11.253	11.4919	14.374	cluster_1
shyg1333	0	0	0	9.2851	9.19681	0	0	0	0	0	12.2258	0	cluster_2
shyg1340	0	0	0	0	0	0	0	0	5.40537	9.28224	11.2245	11.3254	cluster_4
shyg1349	0	0	0	6.21718	14.481	16.7985	17.1946	17.0341	17.1554	17.2937	18.2174	17.4354	cluster_4
shyg1355	11.4701	9.53669	12.2649	12.0352	13.9791	12.1266	11.0027	10.6465	11.5061	10.3537	10.9925	11.6127	cluster_2
shyg1356	6.43819	6.31802	6.69466	9.78483	13.1091	6.11255	5.55109	3.57449	6.10273	6.05374	6.48635	6.2748	cluster_2
shyg1362	0	6.04014	5.63406	3.7585	5.99701	7.61597	7.15659	9.47209	7.56205	10.0865	10.7327	12.3151	cluster_4
shyg1363	0	9.72324	8.88916	9.03919	9.08993	8.6238	8.86472	0	8.1184	0	6.644	0	cluster_2
shyg1370	11.5222	12.8032	13.4944	13.9421	14.4805	13.343	13.793	13.1198	13.5026	13.5854	15.8474	14.9543	cluster_4
shyg1371	10.2327	11.5264	12.1938	10.7	12.3678	12.685	8.54633	8.20985	8.04475	8.58807	14.6565	12.6645	cluster_3
shyg1372	9.12106	11.6674	10.0865	6.43752	6.71822	7.93106	10.1337	11.1485	10.8104	12.8943	13.2881	14.9658	cluster_4
shyg1375	0	11.892	7.56077	0	0	0	0	0	0	17.3801	0	0	cluster_3
shyg1379	11.1662	8.46844	6.89772	4.69541	4.76269	9.35061	10.8856	11.9605	11.5599	13.6511	14.9828	14.6404	cluster_4
shyg1409	0	0	0	0	0	0	0	10.1871	0	0	6.82571	0	cluster_4
shyg1436	8.84008	11.3535	11.9218	9.39074	10.6691	7.58915	7.58518	7.47654	7.60291	7.98254	8.0981	7.37121	cluster_1
shyg1444	18.534	10.3119	0	0	0	0	7.13824	0	0	0	0	0	cluster_3
shyg1447	12.8158	14.1776	12.8507	15.2143	15.0576	15.1211	13.0695	15.0542	14.0956	12.9784	14.4067	12.9242	cluster_2
shyg1449	18.0461	13.1513	11.5274	7.13015	7.44249	8.11687	9.13838	10.6688	8.41902	15.0179	11.2805	11.8868	cluster_3
shyg1450	8.44081	10.7777	9.84447	10.3464	11.0418	10.666	10.8506	9.74199	11.5266	13.5552	13.4631	13.9855	cluster_4
shyg1451	12.4498	13.6668	12.5035	10.5759	11.4098	13.2208	10.3988	0	0	12.677	0	9.92825	cluster_1
shyg1452	5.26621	8.24255	11.819	10.6019	12.1443	10.4783	7.04697	7.71533	8.51553	9.62674	7.44052	8.66786	cluster_2
shyg1465	0	0	0	0	0	4.75068	5.0576	5.84184	7.55782	9.49173	9.03242	8.99907	cluster_4
shyg1466	6.35629	8.01035	5.39779	4.64747	9.33277	11.7773	12.57	12.2108	13.6323	11.9979	12.2121	11.3867	cluster_4
shyg1467	0	0	6.10053	4.58091	10.2891	11.8231	11.8185	12.0221	12.7703	12.5747	11.3937	9.87988	cluster_4
shyg1468	0	8.47003	4.5705	6.22685	8.08547	11.1224	11.3055	9.15559	12.4568	12.622	10.4132	13.1498	cluster_4
shyg1469	7.58735	9.67633	9.46284	9.55681	13.0046	14.1434	14.6241	14.8499	15.2329	14.7131	15.2176	15.139	cluster_4
shyg1514	14.8063	6.43397	6.83416	0	7.78254	6.41452	8.11393	7.24299	6.30913	0	0	8.04051	cluster_3
shyg1520	0	0	0	0	7.03402	0	8.17091	8.29782	0	0	0	0	cluster_2
shyg1562	0	0	0	0	0	0	0	0	7.21959	0	10.6911	0	cluster_4
shyg1577	13.2494	10.6462	0	3.21426	3.28095	8.05067	9.95095	9.98145	10.7514	9.55431	8.34545	9.23276	cluster_3
shyg1589	13.5417	14.2652	13.5832	11.1019	12.2191	13.0882	14.3094	14.1777	13.1893	13.8004	11.1459	12.3321	cluster_3
shyg1590	15.0062	13.7663	13.8739	12.9427	13.3521	12.3665	12.7918	13.0728	11.6663	11.5011	11.8421	11.6167	cluster_1
shyg1591	9.23927	10.2916	8.25642	7.6024	6.93911	8.89513	8.78299	12.2031	10.8505	12.2553	14.4743	14.7395	cluster_4
shyg1597	12.0601	12.9576	13.1725	15.0696	15.9152	12.5726	11.9951	9.94873	9.5585	9.13385	8.99086	8.51246	cluster_1
shyg1599	14.738	9.03229	0	0	7.11984	1.98403	0	0	0	0	0	0	cluster_1
shyg1602	9.8433	9.76486	10.6869	11.0456	11.4451	11.4848	9.58298	7.36498	10.056	10.1213	12.1982	10.5916	cluster_2
shyg1603	13.8182	9.20663	8.26335	10.1952	7.87539	7.09066	8.98893	9.96307	7.766	11.0476	12.0185	12.5699	cluster_3
shyg1606	4.56315	3.3619	8.38476	2.83321	7.19375	9.14747	10.4776	9.91621	12.5486	12.0611	11.5951	10.201	cluster_4
shyg1607	0	12.4163	12.3994	8.31529	5.48891	0	14.5332	0	12.8262	13.0837	13.7617	13.9276	cluster_4
shyg1608	13.9468	14.5385	17.0725	11.301	8.59769	12.2117	12.4117	13.2136	11.9806	0	0	0	cluster_1
shyg1609	10.7007	11.9328	13.0527	12.1743	11.4798	11.7331	12.6428	12.9563	13.0165	12.0654	10.6736	11.3141	cluster_2
shyg1630	6.88646	7.71672	7.93755	9.86515	7.01006	11.4631	11.6795	12.2091	12.3567	12.6124	13.955	12.2481	cluster_4
shyg1634	15.4117	9.93771	10.2642	3.88224	5.8904	7.09994	8.83704	8.70955	0	14.5941	6.88165	0	cluster_3
shyg1641	0	0	0	0	0	8.90373	0	0	0	0	11.7345	13.2338	cluster_4
shyg1643	6.81316	8.30813	8.50541	6.16706	4.41715	4.96057	2.39952	5.48932	4.70587	3.61959	2.13871	0	cluster_1
shyg1644	15.9757	17.5189	0	0	0	0	0	0	0	0	0	20.1298	cluster_3
shyg1647	17.5869	16.4167	0	14.2059	13.0152	14.7839	12.3268	15.6175	0	0	16.5978	0	cluster_1
shyg1669	0	0	0	0	8.77883	7.8339	12.1439	11.9906	11.4196	12.4967	10.2524	0	cluster_4
shyg1670	0	9.87301	0	0	6.67243	12.4118	12.1355	13.7156	12.3131	12.5626	12.5155	12.6897	cluster_4
shyg1695	0	0	0	0	0	6.98147	8.005	10.3777	9.1548	12.6446	13.0157	14.0045	cluster_4
shyg1697	0	0	0	0	6.02886	10.7437	10.3441	13.3692	15.1899	15.4485	14.5345	14.4913	cluster_4
shyg1699	0	0	16.2178	0	0	0	0	16.5567	16.9468	0	17.3441	18.5023	cluster_4
shyg1700	5.99488	0	0	0	4.63157	8.00507	9.45171	8.27234	13.8071	11.2372	15.0485	14.3171	cluster_4
shyg1701	0	0	7.10416	8.47288	10.5831	12.5689	14.0194	14.2126	15.7724	15.8684	16.5319	16.2017	cluster_4
shyg1702	0	0	0	6.01946	0	8.23292	8.0315	9.97945	11.8693	13.1468	14.153	14.5322	cluster_4
shyg1706	0	0	0	10.8922	0	13.0155	13.4056	13.634	14.5113	14.6543	14.6981	15.0703	cluster_4
shyg1713	12.8847	11.7591	11.0688	12.0937	4.97627	8.69457	10.0574	9.84024	10.2113	12.7538	11.22	10.2384	cluster_3
shyg1720	13.979	6.48344	4.57124	2.98285	5.27909	7.06911	8.34271	8.30202	8.47671	10.7405	10.054	9.72262	cluster_3
shyg1724	0	14.675	13.3987	11.3972	12.2653	12.5085	12.7445	13.1067	0	0	0	0	cluster_2
shyg1728	14.7358	16.0694	16.4046	15.0691	12.7189	9.72473	11.4641	11.0029	10.191	12.0454	0	9.93156	cluster_1
shyg1729	15.9269	12.5974	11.6211	9.16239	7.70857	5.794	6.92551	8.34739	0	0	6.89402	8.56724	cluster_1
shyg1738	18.5125	19.8544	19.5936	19.6314	19.569	19.2689	18.732	18.9799	17.7334	18.0452	17.129	17.5272	cluster_1
shyg1775	0	0.940484	2.60828	3.8186	5.79992	9.1778	9.38582	9.08372	14.7372	14.3526	16.1921	14.0393	cluster_4
shyg1780	9.35191	10.1964	12.1697	11.1947	11.0015	9.29807	12.0386	13.0815	12.4171	11.9741	11.2297	9.85383	cluster_2
shyg1791	0	11.0232	8.91043	0	0	7.30204	10.0765	11.3306	9.75839	11.7183	11.3074	11.8102	cluster_4
shyg1797	0	0	0	0	0	0	0	0	9.80122	9.01273	14.2724	12.4188	cluster_4
shyg1798	0	0	0	0	0	0	0	0	10.3955	11.3753	12.0717	12.8512	cluster_4
shyg1827	0	0	14.7324	16.2252	16.6865	0	0	0	0	0	0	0	cluster_1
shyg1863	17.547	16.1688	15.797	14.9599	15.2181	15.5756	15.5847	15.8683	14.5451	16.2269	16.375	16.5198	cluster_3
shyg1868	0	13.4063	12.2298	9.22485	11.0775	7.69051	9.64384	11.0871	7.47225	11.9886	8.82754	10.3208	cluster_2
shyg1872	0	0	9.56479	6.64408	7.66516	10.3111	11.905	13.0776	12.5749	0	12.9738	0	cluster_2
shyg1874	0	10.6634	5.69776	9.63129	0	0	0	0	0	0	0	0	cluster_1
shyg1878	0	0	0	0	0	0	0	0	0	10.2467	7.19383	9.18351	cluster_4
shyg1880	12.014	12.1612	12.2268	10.2335	11.0127	11.6952	12.13	10.4361	10.2758	10.2711	10.2909	10.3603	cluster_1
shyg1890	17.5519	9.39324	6.68712	0	0	8.78669	11.2136	11.9907	12.1534	12.9408	13.1298	13.7194	cluster_3
shyg1891	0	15.4746	12.9524	11.7303	10.4339	9.54058	13.8508	15.2136	12.1507	14.5152	11.6957	11.1918	cluster_2
shyg1892	0	0	0	0	11.9717	13.0915	16.2938	16.3052	0	17.4964	18.1223	18.1186	cluster_4
shyg1894	14.7279	4.8148	6.63306	6.55597	12.2123	5.08998	5.65771	11.8987	6.27224	7.08225	7.33568	9.51403	cluster_3
shyg1899	0	11.086	15.7602	13.6587	12.9226	12.0973	11.3032	12.4835	12.4071	9.42704	12.7861	11.4103	cluster_2
shyg1901	7.82963	9.87752	11.7666	8.8158	8.13638	10.016	11.7352	12.2017	11.5523	13.0515	10.183	10.0124	cluster_4
shyg1902	0	0	0	0	0	0	0	0	6.36629	10.059	9.2333	10.3022	cluster_4
shyg1910	8.07313	9.32853	8.15762	6.94559	9.01158	5.83439	5.08005	4.46708	5.63377	8.2576	8.10989	5.98176	cluster_1
shyg1911	0	10.5567	11.0928	9.84233	11.8879	13.4878	13.3962	13.583	11.2214	13.8735	15.1012	14.9758	cluster_4
shyg1913	10.7682	9.49714	10.6904	9.47777	9.59682	7.83347	8.31157	9.47448	8.86452	8.39973	6.81755	5.68877	cluster_1
shyg1914	13.8066	13.5435	15.1985	13.3128	12.6845	13.6575	14.4428	14.0444	12.972	13.6803	12.3946	11.7218	cluster_1
shyg1918	14.5694	10.1398	9.27624	6.50259	4.92291	6.83726	7.26546	9.02771	10.1829	11.3701	12.0711	11.2191	cluster_3
shyg1919	12.0317	12.35	13.9301	11.8072	14.8965	13.1486	14.3173	14.9195	0	15.522	15.4378	0	cluster_1
shyg1921	0	17.0742	17.0757	16.1845	15.7334	15.5815	16.0438	16.7508	16.7311	17.3416	17.1717	17.3601	cluster_2
shyg1922	12.4444	11.1011	7.12098	7.7211	3.14386	5.82804	11.105	11.0099	13.6984	14.6618	14.598	14.8327	cluster_3
shyg1923	0	0	0	0	0	0	7.93737	9.07151	11.4152	11.3011	12.1376	14.1888	cluster_4
shyg1924	0	9.07285	9.76605	9.41637	10.6274	12.9343	11.0096	12.0126	11.5061	11.4726	11.8319	11.5208	cluster_4
shyg1925	12.7625	13.2812	13.1732	15.3742	13.5707	11.286	12.4345	10.0153	9.01599	10.5057	10.1175	10.2719	cluster_1
shyg1926	13.5076	11.433	13.2171	13.5771	11.8197	9.17646	10.393	9.50599	10.2349	10.057	15.5671	12.4903	cluster_3
shyg1927	9.25486	9.0548	11.3458	9.55811	7.28957	3.97811	6.27202	10.0247	7.5944	9.83419	9.5899	8.46399	cluster_3
shyg1928	15.2789	13.3074	12.3569	9.43064	11.7213	12.1974	11.9572	13.0657	13.4201	14.4773	16.1214	16.3177	cluster_3
shyg1935	12.7478	13.6061	14.2964	14.4885	14.6105	14.2523	13.8339	13.7281	13.534	13.4534	12.3657	12.3815	cluster_2
shyg1998	17.5585	15.0616	7.69337	6.67857	8.3735	8.68529	8.63881	0	7.89012	14.5597	0	8.81593	cluster_3
shyg2020	9.6986	11.4779	11.7052	10.6722	9.72182	10.6617	9.82158	9.91597	9.79349	8.9394	9.97465	8.71036	cluster_1
shyg2035	12.8268	13.0439	14.5048	14.329	8.78152	6.91121	3.71226	0	3.98471	0	5.46494	0	cluster_1
shyg2036	14.6493	14.8438	14.537	13.364	5.74071	4.46131	6.0918	5.76359	1.90266	6.21975	5.43277	5.56866	cluster_1
shyg2041	0	11.213	12.2842	8.72038	8.39298	7.70628	8.01408	9.0299	8.06315	0	0	0	cluster_2
shyg2042	11.9385	13.5199	14.1404	13.4477	12.4568	8.93413	9.15065	9.14232	8.54144	7.57556	7.69362	7.30626	cluster_1
shyg2045	0	13.0504	12.0292	7.85813	7.48179	9.61957	10.8194	11.5306	10.9887	11.7862	10.8658	13.2603	cluster_4
shyg2046	15.4424	11.6237	10.0164	11.9215	12.43	6.46536	0	0	0	0	0	0	cluster_1
shyg2048	11.3722	0	0	6.40005	6.75159	6.32225	7.40751	0	0	0	0	0	cluster_1
shyg2052	12.6103	11.7367	12.6789	12.6902	11.9431	11.4049	12.1598	12.524	11.8258	11.2747	9.90103	7.0958	cluster_1
shyg2053	6.4841	4.2889	5.00459	7.12256	6.09733	5.97182	6.6993	8.69593	8.39851	8.37292	5.93477	5.75576	cluster_4
shyg2054	13.0554	14.608	12.2253	11.1127	11.1735	10.0509	9.20122	0	0	11.9954	0	19.9242	cluster_3
shyg2055	12.4966	9.64008	9.24247	8.89191	6.33366	7.41749	9.48991	6.74089	0	17.3499	2.47246	0	cluster_1
shyg2056	17.2741	18.261	17.3023	18.4271	19.4484	20.1554	20.3974	20.3734	20.9741	20.9325	20.4922	19.6554	cluster_4
shyg2057	0	0	14.2671	12.0033	8.55155	9.09169	10.2301	0	0	0	0	0	cluster_2
shyg2058	9.33114	7.5022	7.247	6.98012	11.0337	10.6464	10.1479	8.83687	10.5628	11.1182	13.1116	14.5196	cluster_4
shyg2059	11.2082	12.5959	13.5027	12.8204	13.8464	14.186	13.802	13.9249	11.6181	10.4222	9.27312	8.39932	cluster_2
shyg2060	10.7715	9.26634	11.8025	11.9277	12.4952	12.0524	11.3018	9.09758	6.48919	7.28091	4.73283	4.43589	cluster_1
shyg2062	0	7.58884	10.9549	9.7126	11.8123	10.3771	7.57826	7.50992	6.82418	7.12275	0	0	cluster_2
shyg2063	8.85221	6.80094	10.4669	10.6063	13.7513	13.8498	15.015	14.076	14.352	6.39808	6.60365	0	cluster_2
shyg2064	4.57312	4.76072	8.18738	7.96091	10.6522	10.7291	8.83777	10.7511	7.44485	6.11364	5.32502	4.64938	cluster_2
shyg2065	14.4768	15.6332	16.1982	15.5399	14.4853	14.9756	15.1674	15.2251	14.9576	14.903	14.7598	13.3709	cluster_1
shyg2066	14.5672	14.4293	12.1481	15.8247	15.2765	16.2442	0	14.9344	15.1856	0	0	0	cluster_1
shyg2067	11.3466	8.43916	10.522	4.84188	2.73734	2.3395	6.24596	7.59067	3.53155	9.23996	5.33555	4.75532	cluster_3
shyg2071	0	10.5571	9.57851	7.00398	0	5.93523	7.09549	7.95685	4.79503	0	0	0	cluster_2
shyg2072	8.52096	9.4607	11.4276	11.0458	11.4779	9.67509	11.3368	10.9334	9.24193	9.6459	7.85605	9.38605	cluster_2
shyg2073	19.586	10.6204	9.29017	7.0885	7.59036	5.96275	5.86358	8.485	6.1645	9.20672	6.21199	0	cluster_1
shyg2074	14.9696	16.1277	16.3802	15.7363	16.0049	15.2705	14.7682	14.8149	13.0452	12.5319	10.0421	11.8091	cluster_1
shyg2076	14.5876	11.0655	13.1647	10.7855	9.45797	12.1835	10.7821	12.707	12.1666	14.1156	14.5806	15.7427	cluster_3
shyg2077	0	10.3855	0	5.13481	2.90468	6.12992	3.05226	0	0	0	0	0	cluster_1
shyg2078	12.1778	12.3511	13.4132	12.9508	12.5649	12.8887	12.2948	12.5166	11.9689	12.1592	12.533	11.5915	cluster_1
shyg2082	19.0309	18.1401	18.1352	18.8943	17.9644	16.7047	16.658	16.6663	16.323	17.3209	16.2718	16.8396	cluster_1
shyg2084	0	0	0	0	8.54584	10.2469	0	0	0	15.2225	12.5737	15.4768	cluster_4
shyg2086	8.80813	12.6705	12.5335	11.4873	11.5886	10.2315	9.73261	9.81233	8.7209	8.48914	7.19854	8.14526	cluster_1
shyg2088	9.05227	9.91692	8.19761	9.52884	8.47428	7.61657	7.08177	6.75472	7.82974	9.60894	10.6283	10.0366	cluster_3
shyg2089	12.2596	12.8941	12.9514	12.5219	12.1166	12.4029	12.8735	12.3788	11.7666	9.78624	9.61197	8.69956	cluster_1
shyg2090	6.49776	7.94205	8.54347	8.52327	8.3839	8.41513	9.43438	9.84263	8.02398	8.76634	7.25467	8.46125	cluster_2
shyg2091	0	3.25631	4.97647	7.05366	2.86202	4.70747	6.12558	3.2216	5.38795	2.34643	6.07561	2.6754	cluster_2
shyg2092	9.31925	10.5499	11.5808	8.42572	9.6418	10.1309	11.944	12.6131	13.3787	14.7909	15.3441	15.3815	cluster_4
shyg2093	8.05048	8.20624	11.817	10.0148	9.39637	8.33352	10.1748	10.2336	10.7103	11.3844	12.3106	11.5208	cluster_4
shyg2094	9.35519	7.46799	8.09301	7.69548	7.56672	8.11733	8.34633	9.4691	8.98624	11.0059	12.2559	11.3393	cluster_4
shyg2098	12.4528	13.5149	12.5924	12.2834	11.1927	10.9014	8.85702	9.90168	9.46069	10.0025	7.56765	8.45051	cluster_1
shyg2100	15.8008	16.6377	17.6958	17.3593	17.4094	16.5793	16.6549	16.3237	15.4619	15.5102	16.6914	15.7158	cluster_1
shyg2101	0	0	0	13.8107	15.0723	14.2213	0	0	17.3601	0	17.4369	17.5517	cluster_4
shyg2106	0	0	9.58945	7.13936	9.53186	9.49972	9.35746	9.76378	12.125	11.2331	13.6571	12.3022	cluster_4
shyg2111	7.64792	10.0759	12.2208	11.7824	10.094	10.6663	10.2214	9.31725	7.23701	8.50128	9.40159	7.17674	cluster_2
shyg2121	15.4002	17.9625	0	0	6.26405	7.97762	8.74808	11.1487	13.0662	14.4249	15.8867	15.8625	cluster_3
shyg2122	17.327	16.359	16.8922	14.7044	13.9245	14.8987	15.3349	15.0129	14.1839	14.8844	11.773	0	cluster_1
shyg2124	11.8222	12.4364	13.1132	11.1427	9.80267	11.4685	10.1816	11.4357	11.2585	12.0919	9.77951	9.62036	cluster_1
shyg2131	15.4755	15.5878	14.1491	10.6301	13.5022	14.4038	14.8685	15.5976	15.9751	16.1525	16.566	16.3865	cluster_3
shyg2132	9.57505	8.23077	9.67222	7.07394	5.68172	4.57783	5.85795	6.3847	5.0424	6.99417	3.61122	4.30844	cluster_1
shyg2135	13.9115	14.5109	15.5188	16.281	14.9669	14.6676	14.7626	14.9704	13.9691	14.6803	14.2495	12.8598	cluster_2
shyg2136	7.84386	7.30672	8.49437	9.0415	5.98043	6.91262	7.02943	9.14688	5.47215	5.00364	10.4788	9.00903	cluster_3
shyg2137	15.7738	15.2132	16.4671	16.5987	15.0755	13.4678	12.4192	13.0496	13.5779	12.6682	14.7007	12.4117	cluster_1
shyg2140	0	7.11951	0	0	0	0	0	0	6.4301	0	7.91745	0	cluster_3
shyg2141	18.4335	5.59829	0	0	7.16982	8.0732	9.60629	10.8588	12.4209	13.5133	14.7612	14.6277	cluster_3
shyg2143	0	13.7218	8.26395	11.3095	10.2588	10.7485	12.9578	13.9029	14.1675	13.5166	11.9684	11.5115	cluster_4
shyg2147	0	0	0	9.73793	16.8139	16.1729	13.5419	12.7988	13.4123	14.5495	12.4259	13.942	cluster_4
shyg2148	8.99803	6.91526	6.99103	8.72881	14.9055	13.3965	11.0886	11.9799	10.0818	11.5899	11.2251	10.4026	cluster_2
shyg2151	17.2006	11.217	11.9529	12.1944	12.0454	11.9292	11.2403	12.2662	9.3946	0	0	0	cluster_1
shyg2152	0	0	0	0	7.30924	6.10232	4.60604	0	5.1049	0	0	0	cluster_2
shyg2153	0	0	10.0921	8.95348	12.9514	12.2173	9.91991	12.1612	9.43504	10.5671	8.10921	10.1552	cluster_2
shyg2154	0	12.1301	12.4239	10.3161	14.0917	13.9952	13.4571	12.1964	12.4536	12.269	12.0099	11.8463	cluster_2
shyg2155	9.91093	0	8.34757	8.29802	11.4297	10.1198	9.25612	9.756	9.23646	0	0	0	cluster_2
shyg2170	9.09634	11.7821	11.6713	12.3258	11.8757	10.4653	10.9567	9.57657	9.11739	8.29716	9.82683	8.23465	cluster_1
shyg2177	11.4385	12.8404	13.6898	12.8028	12.3703	11.7937	12.1013	10.322	10.9018	10.3007	9.62326	8.57851	cluster_1
shyg2178	12.1989	11.585	12.3726	11.7865	10.4501	9.26864	10.0836	10.2094	8.28185	9.04503	8.19824	8.01064	cluster_1
shyg2181	15.4495	13.8281	14.5901	14.1494	13.3653	12.9044	13.3223	13.4214	12.1874	12.1317	10.8868	10.9682	cluster_1
shyg2182	15.3293	14.5213	15.1828	12.5283	11.5342	13.1536	12.7155	12.3316	10.2099	11.4713	9.43671	8.05304	cluster_1
shyg2183	12.4058	13.5707	14.0304	13.5156	12.8072	12.7949	13.2834	12.812	12.5512	11.7917	9.77131	10.3067	cluster_1
shyg2184	14.7838	13.9378	13.3472	10.6496	6.62545	6.30623	6.67008	7.20089	0	6.86592	7.45648	6.96589	cluster_1
shyg2191	0	0	0	0	0	0	9.34389	0	0	0	8.66301	0	cluster_4
shyg2192	13.8833	12.8419	12.1541	11.9354	11.8821	12.1426	12.1652	14.6707	14.7838	12.8297	11.4507	13.245	cluster_3
shyg2193	7.67683	7.14306	7.71408	6.48183	7.85178	7.04733	7.20978	7.63519	8.92009	10.3177	9.72806	13.6716	cluster_4
shyg2201	0	9.5899	6.78674	0	0	0	4.99495	0	5.77092	17.0983	6.20189	0	cluster_3
shyg2203	7.85187	7.15834	6.24624	9.302	10.5909	9.42924	11.3771	7.80131	12.0406	11.1676	8.80951	11.7122	cluster_4
shyg2205	0	8.30317	0	0	0	7.51788	0	0	0	9.04846	0	0	cluster_3
shyg2211	0	7.44336	7.80801	8.12043	10.9807	12.3658	12.3514	13.1035	8.7776	9.71974	7.04987	7.84882	cluster_2
shyg2212	0	4.91146	5.52873	5.64565	4.69107	3.65665	7.01827	0	5.41575	7.76949	4.46248	4.9122	cluster_2
shyg2213	0	12.105	11.6121	9.51675	7.02374	7.17621	8.63908	11.1103	10.3816	12.3558	12.9766	12.2978	cluster_4
shyg2214	14.3848	14.5915	14.6545	13.0693	12.9462	13.4333	14.1423	14.3751	13.8931	14.7535	14.9663	15.5027	cluster_3
shyg2217	12.5582	13.4844	13.2156	10.6535	11.3735	12.3026	10.4058	12.4084	11.5081	11.7812	12.9344	13.3851	cluster_3
shyg2218	7.45254	7.18567	3.11863	3.92289	5.75156	3.88658	8.30903	7.11861	4.43765	4.68974	4.07089	4.78334	cluster_3
shyg2219	7.56935	7.59781	7.03303	10.895	4.05776	5.01469	4.10573	3.58173	2.89062	3.67886	0	0	cluster_1
shyg2220	3.80905	3.17575	6.73108	5.78933	6.88053	5.73945	6.53641	5.87097	2.84958	2.84206	2.25842	1.73665	cluster_2
shyg2221	6.7759	5.96016	4.59883	5.43505	9.61062	10.7703	12.3442	12.4577	14.3801	15.1367	15.8682	15.438	cluster_4
shyg2224	10.1849	14.0278	13.7689	12.3978	13.234	13.3937	13.9407	14.0993	13.8607	14.497	14.8864	15.2713	cluster_4
shyg2225	12.3221	14.8687	15.2787	14.3005	15.2176	15.4976	16.0248	16.0286	16.2412	16.4691	16.6499	17.0029	cluster_4
shyg2226	0	10.1776	10.2568	6.30384	8.06826	12.5049	14.5505	14.2968	12.1704	13.0387	11.316	12.8154	cluster_4
shyg2227	0	5.49271	6.32794	6.29504	10.0498	9.27967	10.6497	8.99056	7.80644	7.99546	10.1704	9.73595	cluster_4
shyg2228	7.27982	6.98078	6.72051	8.04523	10.6241	11.0566	11.7866	12.1181	12.359	11.6737	10.8171	11.4216	cluster_4
shyg2229	0	0	0	8.19278	9.25337	0	11.5859	0	0	0	0	0	cluster_2
shyg2231	10.905	11.6464	11.3477	11.602	10.8007	10.3088	9.31947	8.44393	8.80171	7.14991	7.90516	8.9561	cluster_1
shyg2232	0	0	9.10566	14.7261	0	0	0	0	13.6144	12.4202	14.4981	12.5486	cluster_4
shyg2233	0	9.45758	8.31495	6.38026	7.28543	7.03042	8.45752	8.69416	8.82464	13.6569	12.1946	11.6365	cluster_4
shyg2234	9.66009	9.47383	5.81924	8.69798	9.70341	8.27653	8.39743	11.572	8.91339	10.022	9.9255	7.57466	cluster_3
shyg2236	7.4583	9.51328	10.5607	9.78144	10.4239	9.69236	9.47725	10.6307	9.6829	9.46508	7.80712	7.74095	cluster_2
shyg2238	12.1743	12.3873	14.7335	12.6414	13.0495	12.1979	11.8859	10.6488	11.9128	10.9931	10.1179	9.85876	cluster_1
shyg2239	16.332	14.0705	6.0254	0	7.86304	7.19217	6.01155	0	7.12755	11.111	9.90661	11.3364	cluster_3
shyg2242	11.8678	9.62621	10.0443	6.43435	4.1562	3.49688	3.52902	5.76538	6.16801	15.6269	8.78202	10.0016	cluster_3
shyg2253	0	6.70659	7.04761	6.07284	7.56485	7.73838	6.79535	8.17579	7.27107	6.89701	6.78232	0	cluster_2
shyg2255	10.6081	10.0423	11.8755	9.85995	11.0855	12.273	12.3493	12.5727	13.4724	13.0981	13.7392	13.1215	cluster_4
shyg2257	0	0	13.4822	9.69362	5.04109	9.52274	0	0	0	0	0	0	cluster_1
shyg2258	14.1501	8.09738	8.42419	5.58184	5.7148	7.78667	8.80817	9.78303	7.91028	8.82231	7.47673	7.381	cluster_3
shyg2261	0	0	12.1328	9.77925	13.8074	15.1828	13.7986	15.0209	14.7104	14.9045	16.0661	18.0449	cluster_4
shyg2263	4.94535	5.88307	6.4559	3.42876	3.09408	4.51316	5.20235	5.27092	1.90294	1.65075	1.50827	2.40336	cluster_1
shyg2264	17.5347	13.6637	12.9536	10.282	5.31837	9.37804	11.4375	12.1881	11.2377	12.2287	9.06443	11.6924	cluster_3
shyg2268	9.88018	12.9097	13.224	12.7115	11.2217	10.1167	9.6893	10.4755	10.1363	10.6829	7.68219	9.12615	cluster_1
shyg2272	0	0	0	0	4.97467	2.8335	6.88216	8.86056	6.9161	10.1217	11.0413	9.46366	cluster_4
shyg2294	0	0	0	0	0	8.30361	0	0	14.7858	15.7028	0	0	cluster_4
shyg2298	0	12.3284	11.3785	8.28748	9.66165	10.4224	11.4484	12.8581	13.0759	15.4474	15.4168	16.0443	cluster_4
shyg2329	0	7.18281	8.30061	5.60093	5.82374	7.28237	7.92009	9.44964	8.55179	11.7509	10.1806	11.2849	cluster_4
shyg2333	17.1467	12.2814	10.7065	7.03533	6.71276	0	6.53223	0	7.10374	18.3146	12.0794	0	cluster_3
shyg2334	12.3829	13.0356	13.5573	11.2854	12.7083	13.4336	13.0417	13.6486	14.5315	15.5476	15.1766	15.7149	cluster_4
shyg2363	0	6.60308	0	5.80677	10.9229	14.0125	14.6898	14.9149	15.0922	14.9502	14.8025	14.9789	cluster_4
shyg2365	0	0	0	0	17.1797	17.133	16.7764	16.729	16.04	15.6465	15.2557	15.692	cluster_4
shyg2373	0	0	0	0	0	0	7.97838	0	11.2803	11.0376	13.5405	12.5851	cluster_4
shyg2381	0	0	4.82288	0	0	7.31394	7.68735	0	6.64751	10.9257	6.98027	0	cluster_4
shyg2408	0	0	0	0	6.01946	4.97015	7.9245	11.2364	5.60718	6.93794	6.24172	7.37549	cluster_4
shyg2411	17.0369	10.2605	9.09577	10.2359	7.87047	7.08078	9.21383	9.37013	8.63128	11.215	12.2391	12.9344	cluster_3
shyg2416	12.6027	11.8565	10.303	9.45636	10.6654	8.61253	10.6181	0	11.3926	11.7952	0	0	cluster_1
shyg2417	8.73869	8.11139	7.70172	3.80167	3.5654	7.54212	9.23695	12.8556	11.1805	8.59562	13.1072	13.343	cluster_4
shyg2421	7.80311	12.3252	13.3025	12.9338	12.6957	12.766	11.8822	10.1211	12.2608	11.289	11.7902	13.0647	cluster_2
shyg2422	0	0	0	10.3849	11.425	11.7843	0	11.2054	12.1126	14.8481	10.9691	11.735	cluster_4
shyg2423	16.5252	12.6751	12.4643	11.2852	11.6822	11.7127	10.9231	10.7938	11.1829	12.355	12.3247	12.2212	cluster_3
shyg2429	10.0896	12.9955	12.5993	11.0377	10.2864	9.66514	9.44411	9.0434	7.66562	6.96935	6.46172	6.70805	cluster_1
shyg2432	10.4172	11.0207	11.6545	8.05608	7.61906	9.723	10.2587	10.8842	8.19252	7.59021	8.29998	7.31588	cluster_1
shyg2433	9.49305	8.00004	11.7876	10.5549	10.4786	11.2334	9.84608	10.8306	13.1206	13.2572	15.4558	15.949	cluster_4
shyg2434	15.9201	15.6685	15.1815	16.1521	15.1344	14.721	14.3428	13.8022	11.8285	12.424	12.4602	11.496	cluster_1
shyg2436	10.567	13.1133	12.2692	10.832	10.1264	8.37857	6.02817	5.82911	5.04523	5.55926	4.72788	0	cluster_1
shyg2437	14.7374	14.0876	14.8059	14.8824	13.9815	14.0811	13.5543	13.1771	12.4339	12.2564	10.1883	10.6062	cluster_1
shyg2438	0	10.5635	10.3952	9.61586	8.3909	7.93956	7.86706	9.09391	9.31481	0	9.21699	9.83916	cluster_2
shyg2447	0	0	0	11.3027	12.4353	0	0	0	0	0	16.7184	0	cluster_2
shyg2448	9.33536	10.4963	10.0725	8.89824	6.89069	6.36907	6.42482	5.74411	6.84721	5.95642	4.87979	4.9787	cluster_1
shyg2451	11.6913	8.8691	9.36749	9.58487	8.1637	10.2431	10.7355	11.4586	10.1087	9.27236	9.11382	0	cluster_1
shyg2452	13.6691	13.4338	10.863	8.81691	7.34496	8.97151	10.235	11.6594	10.0214	0	9.98451	0	cluster_1
shyg2454	0	7.48743	4.85947	0	0	0	4.97214	8.36302	5.03279	17.5702	10.4093	0	cluster_4
shyg2455	14.8075	7.94487	6.87568	7.61974	5.78649	0	0	0	0	0	0	0	cluster_1
shyg2460	0	13.6309	11.0712	10.4266	0	0	0	14.0656	13.936	0	14.5607	14.3105	cluster_4
shyg2461	8.67986	11.9202	9.09964	9.58939	9.71245	10.6464	10.0644	9.41511	9.89019	10.6868	9.61766	7.90189	cluster_2
shyg2466	12.5878	12.2472	14.3619	11.9533	8.15809	8.50216	10.3229	10.2492	8.85505	10.009	9.58558	9.1734	cluster_1
shyg2469	13.8271	11.3057	13.9559	13.4425	9.55266	10.5753	7.60506	8.24875	7.45706	11.8428	7.73531	10.2592	cluster_1
shyg2470	0	10.4383	11.9018	9.71767	10.807	12.0562	13.3927	13.636	11.2406	13.1665	10.9331	9.15109	cluster_2
shyg2473	6.75465	7.47059	8.87638	7.87497	10.2972	11.0723	11.914	12.8004	13.5346	14.9663	16.2702	16.0962	cluster_4
shyg2475	12.048	12.5833	14.1928	13.2114	13.5231	13.987	14.6784	14.5487	14.1219	14.1347	13.7874	13.2011	cluster_2
shyg2476	15.7229	14.7771	14.1874	12.6227	12.7953	14.408	15.0624	15.1505	14.5626	15.8493	12.7053	16.0772	cluster_3
shyg2486	7.43886	13.3011	6.50387	6.20398	5.39036	5.05391	5.02566	0	6.59503	8.09599	6.62518	9.41099	cluster_3
shyg2488	10.245	10.8376	9.44974	6.47628	7.22649	5.27457	5.89101	8.3461	6.5417	8.40828	0	8.51495	cluster_1
shyg2491	14.7149	12.3746	10.4115	9.56138	10.3622	7.93976	10.3301	11.8823	11.2925	12.1235	13.9895	14.2287	cluster_3
shyg2492	0	0	0	5.84992	5.89358	9.04451	11.767	12.3061	10.3349	12.4688	13.4896	12.8273	cluster_4
shyg2495	12.8444	12.8684	14.3013	13.8671	13.0658	12.3296	12.3901	11.8358	12.4635	11.5601	11.4195	10.6946	cluster_1
shyg2496	10.617	11.6406	12.5537	12.5147	11.9098	11.0764	9.50265	9.73012	10.8496	9.00492	6.51029	7.20831	cluster_1
shyg2497	11.3549	4.71709	3.63257	8.09441	0	5.01867	7.04766	6.93718	4.48181	12.9103	7.60483	8.82668	cluster_3
shyg2499	7.68823	7.44834	10.0041	9.78844	8.50277	8.09897	7.18687	6.95182	8.042	5.22227	8.47668	7.91324	cluster_1
shyg2501	0	0	0	0	0	0	0	9.78949	0	17.6546	14.1009	15.5362	cluster_4
shyg2518	16.3795	14.8969	15.1185	14.415	13.1388	13.9828	13.861	14.1743	13.4937	0	13.8122	13.4036	cluster_1
shyg2522	11.8498	11.8181	12.5634	12.4544	13.435	12.9895	13.1091	13.3158	12.6266	10.729	11.461	11.4304	cluster_2
shyg2529	0	12.3929	11.6853	16.2853	17.1447	17.1576	17.3209	17.4557	18.2311	0	0	17.6979	cluster_2
shyg2530	10.1897	9.56619	10.7156	10.3265	14.9136	14.7702	16.848	17.2412	17.9515	17.1487	16.301	16.2395	cluster_4
shyg2531	6.68519	9.41829	12.725	10.8813	9.78629	11.1974	7.98951	8.33032	10.9833	13.3923	13.122	14.6807	cluster_4
shyg2534	0	13.9132	11.8057	7.06809	13.1208	14.0157	12.8068	13.2753	13.1404	14.314	14.3309	15.4013	cluster_4
shyg2538	16.9723	9.64016	8.96802	0	7.14727	0	0	7.88905	8.54932	9.63809	11.3279	11.4448	cluster_3
shyg2545	13.7687	10.6023	6.36181	7.01906	3.28983	6.44164	8.09185	7.84133	8.8822	8.17123	8.31544	9.93371	cluster_3
shyg2549	13.2502	14.5786	13.1904	8.34995	6.41224	7.89234	10.1278	9.88961	10.7513	9.90265	10.2468	11.4006	cluster_3
shyg2553	15.8529	17.9454	15.4657	14.3185	11.3128	9.93055	9.36971	10.2623	9.24192	11.0912	11.6817	11.6617	cluster_1
shyg2554	14.278	13.6083	16.394	16.7768	15.3418	14.1413	11.7614	12.4681	11.2893	11.7515	13.7768	13.2718	cluster_1
shyg2555	13.9309	12.0831	11.6901	12.5955	12.253	10.827	12.4444	11.7688	10.7803	10.556	8.34469	12.9611	cluster_1
shyg2556	12.2332	13.6533	12.6627	12.2388	12.1096	10.5386	10.0916	10.6744	8.81688	11.0875	10.1389	9.08727	cluster_1
shyg2557	10.8737	11.9861	12.7515	11.4711	12.1771	12.6453	13.0948	14.0454	13.5034	12.3842	13.5636	13.2157	cluster_4
shyg2558	0	0	0	0.960127	3.47018	6.91923	7.1539	7.81569	7.59364	12.389	7.87271	8.54973	cluster_4
shyg2562	10.0776	10.7844	0	10.0683	11.4895	0	0	0	13.9915	10.5671	0	0	cluster_1
shyg2570	13.7067	16.6171	16.3663	16.0293	17.4983	17.3168	16.8225	16.6359	15.9335	16.9082	15.2401	13.641	cluster_2
shyg2574	15.4566	15.2594	14.1599	10.9377	10.9515	12.202	11.9628	11.1812	10.6372	12.5457	11.6078	11.3275	cluster_3
shyg2578	11.8304	8.81728	9.01828	6.73747	6.12208	5.26995	6.41652	6.25221	5.68183	5.95085	4.22078	4.40098	cluster_1
shyg2583	8.33252	9.96966	10.7618	7.10518	5.77934	9.23591	5.7754	9.45449	4.03166	8.46069	5.67748	5.59209	cluster_1
shyg2585	13.0639	12.4625	14.0111	12.033	12.2282	12.5764	13.0492	13.3302	11.8727	12.3788	11.624	9.5432	cluster_1
shyg2586	9.79804	11.1108	11.4694	11.0947	11.1639	11.3319	11.435	12.424	10.7619	10.8131	11.4809	9.2854	cluster_2
shyg2588	11.6107	12.8306	12.2412	13.6783	11.7533	11.051	10.4132	11.9227	10.4892	9.23634	7.17463	8.6065	cluster_1
shyg2589	12.2056	12.9201	13.9858	14.0756	13.6051	13.6643	13.9121	13.5429	13.9352	13.2393	12.4243	12.3279	cluster_2
shyg2590	0	10.5958	9.72182	9.4109	9.91671	7.54396	7.84029	9.84926	6.22718	0	0	0	cluster_2
shyg2591	12.668	9.95691	11.6852	6.63996	5.62783	4.65748	6.53269	6.45506	6.70553	6.73875	7.85587	7.16626	cluster_3
shyg2593	13.0273	9.88701	9.68352	5.60361	7.18409	7.31336	7.9687	9.57872	8.93008	11.3831	9.65398	12.1464	cluster_3
shyg2596	15.2389	17.0446	14.4123	12.3487	12.3924	11.4303	11.9351	0	12.3979	0	13.3429	15.2376	cluster_1
shyg2598	14.9917	13.9293	13.8222	14.8696	14.0031	13.4183	13.56	13.5353	13.2068	12.299	12.3175	9.72274	cluster_1
shyg2599	14.653	14.1652	15.0529	14.4494	14.2776	14.3795	14.6821	14.4699	13.7947	12.9908	11.6659	12.493	cluster_1
shyg2600	13.2448	13.1738	14.8142	14.9431	15.3352	15.8917	15.7674	16.4281	15.6951	14.2717	14.2112	13.4431	cluster_2
shyg2601	11.6748	12.3387	13.3116	12.6509	11.8694	11.7411	12.2949	11.7962	11.6792	11.2289	9.84163	9.13515	cluster_1
shyg2602	0	0	5.90293	12.2544	0	0	0	0	0	0	0	0	cluster_1
shyg2603	10.387	10.4067	12.5963	13.1112	14.2646	14.3203	13.9437	14.4584	12.7504	13.0662	9.08774	10.4865	cluster_2
shyg2606	10.6891	12.8681	12.0161	12.6663	12.5957	11.625	12.8415	12.1402	11.8682	9.48075	8.55029	5.23079	cluster_1
shyg2607	12.4997	12.0739	12.0802	12.4031	12.675	13.8112	14.5505	13.8882	13.313	12.2781	10.3163	9.71947	cluster_2
shyg2608	11.8553	12.0124	12.5356	12.3051	13.2646	13.5106	13.9258	14.3028	14.2779	12.4636	11.0268	9.14219	cluster_2
shyg2609	9.12365	8.57532	9.95986	11.501	7.64156	8.46035	8.09373	8.11299	8.47105	8.69849	9.47565	10.1943	cluster_3
shyg2611	11.8312	12.2474	12.9844	13.9449	14.8087	15.0134	14.5763	14.1265	14.629	13.6433	12.8345	14.398	cluster_2
shyg2612	6.78171	6.39659	4.15446	4.04824	4.39117	5.96842	6.23546	6.86306	5.98081	6.24331	5.81533	8.75252	cluster_3
shyg2620	0	0	0	0	0	0	7.07398	0	9.73976	11.0456	12.3069	11.7557	cluster_4
shyg2621	16.7243	17.8468	7.97354	7.60736	7.95397	8.30388	10.7621	9.69273	8.59055	0	0	0	cluster_1
shyg2623	16.8943	17.8303	0	0	0	0	0	13.0839	0	0	0	0	cluster_3
shyg2625	10.9468	12.2906	11.5267	12.5723	11.5517	9.87944	9.34421	9.99878	10.4315	9.38016	10.1245	8.80897	cluster_1
shyg2627	0	0	0	0	0	4.31894	10.2283	11.0708	10.7243	10.5899	12.6555	12.1964	cluster_4
shyg2628	0	10.9746	0	0	6.27562	8.77944	6.83068	0	10.4033	12.2247	10.6481	0	cluster_4
shyg2629	16.7179	17.9283	15.4457	9.96885	0	0	0	0	0	0	0	0	cluster_1
shyg2631	14.5677	10.34	9.29492	10.4527	9.28923	8.34263	7.21386	10.1882	7.98602	11.486	12.11	13.052	cluster_3
shyg2632	0	7.4017	0	0	0	2.47873	6.80547	7.87819	0	5.15085	0	19.3016	cluster_4
shyg2633	16.2933	17.3066	16.6147	16.0055	15.6321	16.0821	16.4981	16.2102	16.6304	16.6886	16.821	16.4211	cluster_3
shyg2634	5.65753	6.23362	8.01237	7.87161	8.19957	9.38067	9.30024	9.06585	8.50527	7.83469	8.35516	7.82208	cluster_2
shyg2642	5.1674	8.74459	8.5085	7.47147	8.86444	9.14618	8.74369	9.07067	11.0674	8.69614	10.5554	9.92278	cluster_4
shyg2643	10.391	13.8369	15.0155	15.5863	15.8441	16.5874	16.5519	16.3737	17.2058	17.1214	17.2473	17.0332	cluster_4
shyg2652	0	6.97506	0	0	0	0	7.1594	0	7.46297	17.1514	0	0	cluster_4
shyg2654	17.3818	15.8273	17.4383	17.1826	18.2807	16.4728	12.9215	0	13.0709	13.447	14.5792	13.9657	cluster_1
shyg2662	16.1637	15.3497	15.4617	15.1283	14.1921	13.1252	14.0251	13.9952	13.4876	12.9219	11.6986	10.5146	cluster_1
shyg2671	11.1786	10.807	11.3055	11.1757	12.4594	11.6099	11.5074	11.8579	11.5012	9.66355	9.39687	11.0057	cluster_2
shyg2672	11.4961	9.39557	9.27118	9.22962	8.25803	7.44404	6.67938	8.51864	9.36184	9.75419	9.12213	9.86493	cluster_3
shyg2673	10.461	10.5929	6.31619	6.27708	2.84207	4.00851	3.98301	5.63932	0	6.53005	8.09333	0	cluster_1
shyg2674	0	0	0	0	5.38366	4.65636	8.21601	6.43891	12.9649	14.9061	17.0912	16.1052	cluster_4
shyg2675	0	0	0	0	0	0	0	0	7.02912	8.61668	10.4461	7.99572	cluster_4
shyg2677	0	0	0	0	0	0	0	0	9.73849	11.7197	12.3775	12.1596	cluster_4
shyg2679	7.87308	12.0206	13.3414	11.6797	10.4091	9.49616	8.51824	7.43241	7.11383	9.65863	0	7.92948	cluster_1
shyg2681	5.23375	8.96491	5.94564	8.10782	9.89849	11.4275	9.50657	10.931	10.1218	9.8708	8.2487	6.26182	cluster_2
shyg2683	0	0	0	0	0	0	0	0	6.59021	0	7.09159	7.89428	cluster_4
shyg2686	9.42	12.8529	11.5299	13.5325	13.4152	11.5866	7.9411	7.71792	7.58582	7.89198	10.0533	8.2497	cluster_1
shyg2697	12.1641	9.60924	7.5029	6.71504	1.80123	3.7101	0	0	0	0	6.70555	7.18248	cluster_3
shyg2702	7.66981	7.30529	7.83726	7.66061	13.1291	13.1174	12.7516	11.8756	11.1852	8.17255	7.08291	6.21018	cluster_2
shyg2703	8.44933	8.72351	8.69615	9.09173	14.4616	14.7446	14.216	14.4345	12.3083	11.8645	10.3708	8.64747	cluster_2
shyg2705	0	0	0	8.2355	7.17312	8.57112	9.69323	9.86455	12.9415	14.0321	15.4133	15.2346	cluster_4
shyg2713	11.0861	8.24934	10.0964	7.73071	5.38427	8.58512	11.6202	11.9155	12.3656	13.4797	14.7882	14.9608	cluster_4
shyg2717	15.1567	14.4628	13.754	13.8575	13.0304	12.4667	12.177	13.218	10.9309	10.7062	10.5786	10.652	cluster_1
shyg2718	10.7132	12.3533	13.0221	13.283	13.1834	13.627	14.2902	13.1853	12.8579	10.7055	7.82559	9.30148	cluster_2
shyg2719	9.47283	9.5834	7.89845	9.63643	8.87357	7.92222	9.14453	3.7566	5.96665	5.57841	4.83186	5.68573	cluster_1
shyg2721	14.2022	12.5996	12.5459	10.9596	7.12224	10.9854	13.0021	12.3874	13.7835	14.5062	16.9106	15.6989	cluster_3
shyg2722	0	8.63428	0	7.79388	6.40957	0	0	0	10.3092	0	0	0	cluster_2
shyg2723	13.2553	11.6868	12.8952	13.5195	13.0379	13.4822	13.0092	11.8198	12.6727	10.9099	9.70863	9.13934	cluster_1
shyg2724	18.4866	19.1113	13.3531	8.60301	7.40398	7.70639	5.92227	9.27429	6.31597	17.2092	11.3308	7.51879	cluster_3
shyg2726	8.02511	7.9123	7.32667	9.0588	11.6003	10.7567	11.6894	10.7722	13.2451	12.1002	13.9362	14.2164	cluster_4
shyg2728	0	0	0	5.21865	6.32152	6.30111	0	12.3552	11.5174	0	11.7823	0	cluster_2
shyg2729	9.88078	9.14307	10.6108	12.8833	12.9813	12.3486	12.5997	13.3725	13.8713	15.6549	16.865	16.5964	cluster_4
shyg2730	0	10.791	11.6388	11.9392	14.5506	12.4562	15.005	15.659	15.7802	17.7007	17.7004	17.9153	cluster_4
shyg2734	11.5596	8.61264	9.22442	3.63414	0	1.25442	2.44965	0	0	0	0	0	cluster_1
shyg2736	9.98469	10.4052	8.64944	11.369	8.92338	12.7172	8.74978	0	7.73891	9.1127	8.53155	0	cluster_1
shyg2737	0	0	13.0403	7.82065	10.0891	10.2959	11.3801	11.5663	10.8395	0	11.2914	0	cluster_2
shyg2739	17.7423	17.7185	16.8503	15.1082	13.2348	15.1328	16.6823	15.4369	16.6315	18.2069	18.0476	16.9729	cluster_3
shyg2740	10.4412	13.8423	13.1431	11.0387	10.424	11.0625	11.1591	11.1178	6.41554	7.92436	7.94557	0	cluster_1
shyg2741	12.9021	15.129	10.811	11.6874	11.9913	9.34413	8.11333	11.5019	7.5368	7.33709	12.3662	8.71031	cluster_1
shyg2746	0	0	0	8.6367	0	13.1097	0	0	14.4525	0	0	0	cluster_2
shyg2751	6.01582	6.08813	4.22026	4.12601	3.08954	3.58822	4.35703	5.5334	2.5649	0	9.33129	8.14746	cluster_3
shyg2752	8.47241	6.65845	7.10161	6.35736	4.65722	6.74951	5.94978	5.35938	5.74937	7.39844	1.93807	3.47279	cluster_1
shyg2754	7.33012	6.86093	8.12321	4.93857	4.3645	2.72534	4.71682	2.37601	3.4925	1.13585	0.905732	2.28621	cluster_1
shyg2758	17.0764	16.8904	14.3831	8.63642	6.49464	8.6802	11.7348	11.9937	9.82199	12.2763	7.63658	11.4594	cluster_3
shyg2761	10.0806	9.66532	9.22318	10.252	11.1709	9.21896	9.26295	10.0522	9.94574	11.6697	10.0169	9.55122	cluster_4
shyg2762	16.3691	15.059	14.308	12.1808	12.0771	12.0938	13.0309	13.107	13.7866	15.0024	15.8511	16.2821	cluster_3
shyg2763	16.5443	14.9558	16.3652	13.4248	9.07707	7.02446	0	0	0	0	0	0	cluster_1
shyg2765	6.30697	8.11872	10.3002	9.55566	9.62126	9.09427	8.28037	8.26125	9.46437	8.88045	7.69929	8.69465	cluster_2
shyg2766	17.3125	16.7759	16.3844	15.4244	14.5891	14.6623	15.876	16.0576	15.771	15.6189	15.8454	15.5624	cluster_3
shyg2768	0	16.043	17.5653	14.9886	13.1355	0	14.5901	0	0	0	0	0	cluster_1
shyg2769	18.0117	9.67341	11.8141	9.39716	9.18958	9.63085	10.4585	10.7243	10.6712	10.9159	10.994	11.1667	cluster_3
shyg2771	8.65908	8.9166	10.4896	9.52632	8.1629	7.2818	7.66628	7.1539	5.51849	5.66043	4.96945	6.42569	cluster_1
shyg2773	10.7086	11.6302	12.759	12.9703	12.3052	11.315	10.8203	11.4284	11.1794	11.0706	11.6524	12.6028	cluster_2
shyg2775	8.38572	7.9738	7.33984	4.94487	6.27934	3.61652	4.47026	4.66306	4.14554	0	0	0	cluster_1
shyg2776	0	0	0	12.2635	12.4162	12.8745	14.697	14.7048	15.163	17.0828	18.7639	18.6054	cluster_4
shyg2777	10.8934	10.7444	12.2463	11.6301	11.6017	11.1854	11.0809	11.1728	11.4552	11.4506	12.5162	10.3839	cluster_2
shyg2778	7.22982	10.5203	11.3734	10.3979	9.12534	8.27602	9.46921	9.30343	6.71561	4.46884	5.8563	5.22567	cluster_1
shyg2784	14.7781	16.4912	0	0	0	0	0	0	0	18.4974	0	20.8498	cluster_3
shyg2785	0	0	12.9372	6.54602	10.026	11.694	11.8404	13.0152	12.4184	14.4708	14.1981	14.0304	cluster_4
shyg2789	0	5.32801	10.6479	6.54851	7.58436	8.39855	7.97527	9.52881	10.2391	9.68397	7.53984	9.45433	cluster_4
shyg2790	17.6743	16.5581	17.3078	16.9106	16.3096	15.894	16.2392	16.1565	14.864	17.5512	6.85849	0	cluster_1
shyg2798	12.6465	13.141	11.5797	11.9721	12.6385	11.3446	10.7675	11.1241	10.497	10.0848	10.0049	9.13204	cluster_1
shyg2800	13.4145	12.7621	9.56926	11.5242	8.97513	13.2582	0	0	0	0	0	0	cluster_1
shyg2801	9.93859	9.82354	11.249	9.83012	9.17163	13.3819	9.46484	9.24677	0	0	0	0	cluster_1
shyg2806	10.7773	13.1567	12.8312	9.53982	7.47977	7.7936	10.7136	11.7775	11.1381	12.4672	13.0696	13.8569	cluster_3
shyg2812	13.3398	13.8315	14.4804	14.2107	14.4417	14.1584	14.161	13.7639	12.6303	11.629	11.4247	11.1461	cluster_1
shyg2814	2.95448	0	0.893032	1.9938	5.95267	9.68193	8.74682	11.5981	6.74189	8.11611	5.00931	5.74127	cluster_4
shyg2819	13.0072	8.94437	9.85498	13.2723	11.5352	11.2094	7.91009	7.7299	8.47357	8.50589	9.09359	8.72276	cluster_1
shyg2820	11.3522	7.43829	7.21807	4.9139	6.38616	4.37796	7.73588	7.39416	8.39011	11.7619	8.76593	9.07612	cluster_3
shyg2823	6.02588	10.2157	10.2449	10.4125	10.1593	9.1703	9.96409	6.3198	7.18542	6.28809	7.46666	6.14692	cluster_2
shyg2824	0	8.66042	11.925	11.6386	8.35195	9.06287	10.0222	10.3349	6.52324	9.72357	0	0	cluster_2
shyg2825	0	11.6381	14.8528	11.8103	12.5574	13.3143	12.556	12.1346	11.7055	12.026	12.393	12.1066	cluster_2
shyg2826	8.83099	7.90852	7.94273	8.53171	5.74322	7.72126	8.94342	8.06516	7.61713	7.47754	4.16881	5.08179	cluster_1
shyg2828	10.9063	10.8551	8.87304	6.30825	6.27614	4.43228	4.72381	6.78966	4.91663	7.96903	11.3227	11.4337	cluster_3
shyg2829	0	10.0114	12.2207	9.9941	8.88746	8.935	9.16158	9.19998	10.5816	9.89893	11.2453	9.63927	cluster_2
shyg2833	8.86894	7.16347	9.01377	7.71477	7.39421	9.14367	6.69777	6.75797	3.34612	0	0	0	cluster_1
shyg2834	0	10.2639	0	10.3098	0	6.58019	7.94771	0	0	0	0	0	cluster_1
shyg2835	15.1921	12.7657	14.6152	10.0459	10.3381	8.76544	10.1297	10.9136	10.8979	12.5713	11.427	0	cluster_1
shyg2837	17.1851	15.7029	11.3064	6.20119	6.63425	9.36484	0	0	0	17.3972	0	0	cluster_1
shyg2838	12.4267	13.3128	13.8596	11.5123	12.2268	9.84929	9.72646	10.4674	9.70907	8.67608	9.62836	10.1859	cluster_1
shyg2839	9.54539	9.3547	10.0847	10.3863	8.34595	11.7844	12.4601	12.7992	11.0444	10.2774	7.75178	9.4428	cluster_2
shyg2840	14.812	14.5085	16.034	15.8382	16.0623	16.2228	15.8367	16.0866	16.0371	17.0766	18.0055	18.7376	cluster_4
shyg2841	7.94799	7.64082	8.83302	8.56875	9.20024	8.88995	9.46596	9.21431	10.4943	12.4129	12.3786	13.5873	cluster_4
shyg2842	15.1965	16.7656	16.4068	15.9348	16.1799	15.9528	16.592	16.7511	16.6968	16.1453	16.7546	13.4743	cluster_2
shyg2843	0	16.3793	15.0555	14.898	13.0538	13.0396	14.8016	14.4753	15.2082	15.6864	17.2397	16.6008	cluster_4
shyg2847	13.3069	13.1147	13.7324	12.6611	11.5182	10.6584	10.9324	9.24616	10.9284	11.7229	13.672	11.2261	cluster_3
shyg2848	12.882	14.8219	14.3817	14.5714	14.4283	14.3767	14.6694	14.9961	15.9745	15.8554	16.4907	16.5394	cluster_4
shyg2849	0	7.05909	0	0	0	0	7.23886	7.86551	0	0	0	0	cluster_2
shyg2850	16.2568	15.5913	16.1955	16.6036	16.4103	16.6852	16.6031	16.6452	16.5249	16.5542	16.4517	16.5847	cluster_4
shyg2852	0	0	0	0	0	7.79024	6.71357	10.5543	7.14738	0	0	0	cluster_2
shyg2853	12.9704	12.3412	10.7325	10.1969	5.4481	5.01627	7.01306	7.9144	2.33861	4.50537	7.03844	5.20695	cluster_1
shyg2855	9.11336	9.95344	8.32128	11.5153	9.15576	5.12494	7.29186	6.13304	4.5932	6.13528	6.04067	6.20193	cluster_1
shyg2857	2.80905	7.72353	4.16078	4.73643	5.12627	7.13082	8.00164	6.65584	8.62889	6.71408	7.16638	8.78204	cluster_4
shyg2858	0	7.20112	6.5111	0	0	0	0	0	6.5288	0	0	0	cluster_1
shyg2861	8.21589	9.18985	10.4856	8.20674	10.1219	10.0943	12.5142	12.6387	13.6548	14.7471	15.6801	14.8088	cluster_4
shyg2863	14.0296	10.0857	8.0089	4.87436	4.19289	4.442	6.68725	8.64687	7.54141	11.1071	9.31343	10.5402	cluster_3
shyg2867	8.4617	8.75184	10.5868	11.7203	11.9078	11.8606	11.2687	11.6525	11.4978	9.83714	9.34835	9.68039	cluster_2
shyg2868	0	0	0	0	0	0	0	7.43302	10.8593	10.2873	11.8391	12.8487	cluster_4
shyg2872	13.9348	11.9711	11.7565	11.8532	11.6632	11.4798	11.551	11.3553	10.6217	12.248	11.0862	11.1217	cluster_3
shyg2873	14.4128	14.3285	14.3809	15.2106	14.3929	13.8283	14.1279	14.3451	13.5159	13.5616	12.801	12.4047	cluster_1
shyg2874	16.0754	16.6089	16.9797	16.9849	16.8872	16.6488	16.7255	16.8136	16.6894	16.4896	15.9275	15.6006	cluster_2
shyg2875	7.80218	15.5109	9.10049	4.18135	4.90061	6.15759	6.44042	9.57318	7.6044	8.47667	10.0695	10.1105	cluster_3
shyg2876	11.7227	12.7791	12.9468	12.9315	11.7125	11.4978	10.4903	9.65717	8.93518	5.32687	6.62555	5.76028	cluster_1
shyg2877	0	0	0	0	0	0	5.74028	6.74822	0	0	10.6833	7.88814	cluster_4
shyg2884	11.2872	11.2067	11.2727	9.62515	12.7457	12.3296	9.89024	12.8478	10.0609	10.6833	14.1827	12.7229	cluster_4
shyg2886	12.1375	12.9563	14.0736	11.9195	10.7142	11.8542	11.9364	12.8093	11.3041	11.4737	11.757	11.5886	cluster_1
shyg2888	15.2281	16.3638	16.6901	15.9654	16.5694	16.6347	16.9577	16.9859	17.2732	17.6044	17.9238	18.1183	cluster_4
shyg2890	8.58238	7.71702	8.77185	10.5936	13.7062	13.2262	14.1845	14.3735	15.4279	15.1203	14.5621	14.2811	cluster_4
shyg2902	7.60455	9.87737	9.21641	10.3004	15.3166	16.2213	17.2958	17.4522	17.0769	16.7275	16.0648	16.7166	cluster_4
shyg2905	0	12.3157	10.4712	0	0	0	7.46549	12.0945	7.61455	0	0	0	cluster_2
shyg2909	0	0	0	0	13.2459	11.847	0	0	0	11.8578	12.15	11.9236	cluster_4
shyg2914	11.4743	11.6402	11.5254	14.9264	13.602	7.9951	11.2209	12.5071	15.4859	7.32132	4.81431	0	cluster_1
shyg2917	16.0376	16.5931	16.0573	14.6618	12.945	12.6615	12.5344	13.9224	10.6676	11.3529	0	9.02451	cluster_1
shyg2942	0	15.7018	14.6501	12.6499	14.6045	15.5735	15.5246	15.5764	15.9635	17.5244	17.3145	16.624	cluster_4
shyg2943	15.5151	12.7528	4.95983	0	4.8144	6.00803	0	0	7.99351	0	9.84599	0	cluster_3
shyg2944	6.29201	8.64204	6.62074	7.91619	8.07789	7.38692	5.08702	6.61567	10.2289	9.06354	7.19304	7.49063	cluster_4
shyg2954	0	9.7894	9.93169	7.33083	6.49966	3.70595	6.23227	0	6.93251	0	0	0	cluster_1
shyg2958	0	0	0	0	0	7.13666	0	0	0	0	0	0	cluster_2
shyg2963	9.28111	11.4215	11.5579	12.3904	12.7292	11.8387	12.3141	12.8933	11.0958	12.5632	12.1147	9.95924	cluster_2
shyg2975	0	0	0	0	7.02278	5.94543	8.29258	7.57474	11.2014	9.61382	11.3436	11.1912	cluster_4
shyg2977	11.6436	13.4564	11.8812	10.2943	10.2194	10.3422	10.4153	9.33025	8.6108	7.13601	7.24671	7.25413	cluster_1
shyg2980	12.5558	13.2258	10.2931	12.3349	6.87338	5.57471	5.46216	6.17197	0	0	6.37603	0	cluster_1
shyg2981	17.5796	10.7712	8.44736	10.432	0	6.10682	0	11.1103	0	0	6.47439	0	cluster_1
shyg2982	18.9796	10.0349	9.7321	9.2465	6.65101	0	0	0	0	16.53	0	9.8829	cluster_3
shyg2983	0	0	0	9.54384	0	0	0	0	11.6817	0	0	0	cluster_2
shyg2985	15.8756	14.306	12.2899	14.6485	14.4471	14.7062	15.1539	15.1735	14.3305	11.9114	10.8543	11.4425	cluster_1
shyg2991	0	12.1957	11.417	7.24865	6.73353	9.71793	9.6525	0	10.0747	18.0629	9.46818	12.3674	cluster_4
shyg2992	0	7.26776	7.53013	7.41768	7.53146	7.32518	8.99094	7.64355	9.088	8.29973	8.86464	6.71866	cluster_2
shyg3003	0	0	0	15.4596	14.9499	0	0	0	0	0	16.8818	0	cluster_2
shyg3004	5.47303	5.3951	3.38523	2.17289	5.36153	7.33145	9.61471	6.95848	9.49767	13.4161	13.8019	11.9755	cluster_4
shyg3024	3.58756	3.93578	5.03877	3.63991	4.5857	5.82494	10.2292	7.00577	9.59822	7.18742	8.15887	7.40376	cluster_4
shyg3045	6.65551	10.2113	9.82258	7.96645	7.15883	7.96276	7.00215	7.1883	2.92607	5.19048	4.92189	0	cluster_1
shyg3056	17.7193	15.8505	15.3879	13.9807	12.1834	12.4924	12.4366	12.5074	11.2205	11.7657	11.3359	10.0653	cluster_1
shyg3093	0	13.8228	10.6311	10.1583	8.96178	8.97624	9.33578	12.3163	11.2831	0	9.31962	0	cluster_2
shyg3095	16.7415	11.6571	9.74941	6.13143	4.40971	7.32733	8.30891	10.9909	7.55503	11.4168	6.66224	9.62774	cluster_3
shyg3096	9.76136	15.5754	12.8214	11.5224	6.3422	6.34789	6.82779	8.88255	6.08692	7.62941	6.15879	0	cluster_1
shyg3097	0	0	11.5902	8.83079	7.88708	10.7945	0	0	0	0	0	0	cluster_2
shyg3104	0	10.1876	7.28108	5.27817	5.42366	7.89458	9.68174	9.991	9.21552	12.1162	11.2172	11.4202	cluster_4
shyg3115	15.8273	15.431	15.085	14.6116	14.6093	14.7202	15.0112	14.6879	14.5578	14.3135	14.3153	14.2598	cluster_1
shyg3117	0	4.99313	5.538	0	8.73467	9.17373	11.0972	10.6897	11.7179	11.3797	12.4406	12.1631	cluster_4
shyg3120	0	8.60651	9.8445	6.53	5.40315	4.51463	8.23029	8.2907	5.90575	0	7.76404	8.73876	cluster_2
shyg3122	14.059	11.4048	9.50038	10.5614	9.69736	7.29555	8.1975	10.2444	9.35446	11.8227	12.5236	13.5179	cluster_3
shyg3124	13.5153	13.1087	0	13.8825	13.8258	14.4108	14.3271	12.9441	15.7699	15.1471	17.1152	15.6488	cluster_4
shyg3126	16.6412	14.4046	9.47774	10.4301	0	8.08965	7.56897	10.9737	8.34567	11.2489	7.2414	0	cluster_1
shyg3129	14.7626	12.5864	10.1275	11.7575	10.4719	8.33459	10.3928	11.9192	8.02559	10.7965	10.307	0	cluster_1
shyg3146	19.1057	18.6063	19.2691	18.0347	18.0914	17.8879	18.1708	18.372	17.9032	17.9935	17.4951	17.8708	cluster_1
shyg3150	11.4532	12.0378	12.1211	12.3683	10.2002	12.7468	11.9991	11.8841	7.75293	11.4721	0	11.5824	cluster_1
shyg3155	0	0	9.74404	0	0	6.2058	8.41143	7.85343	7.34573	13.9228	11.5286	9.36681	cluster_4
shyg3183	0	7.954	9.98779	5.45437	8.50351	7.27272	5.77481	0	4.41007	6.09046	0	9.83673	cluster_2
shyg3190	0	8.43478	0	5.88992	7.42472	11.7951	12.1027	14.2892	11.145	14.4545	11.1523	11.2013	cluster_4
shyg3195	12.2233	7.81471	8.24487	8.58666	7.9514	9.75993	7.27206	8.91308	7.89365	9.94248	10.8067	10.1325	cluster_3
shyg3199	8.32615	6.36519	8.34727	7.44666	8.94821	8.12656	10.4225	9.82482	11.7547	13.4627	14.3096	15.48	cluster_4
shyg3200	11.8426	11.1498	10.7649	9.27885	10.7368	11.3079	12.6866	14.0908	11.6536	11.9953	13.1258	13.0798	cluster_4
shyg3201	15.3269	15.473	14.7666	13.5994	13.6889	14.1732	14.5823	14.7636	13.4601	14.7509	12.8208	13.6772	cluster_1
shyg3202	14.3073	15.3481	14.967	14.4286	13.1869	14.5852	15.5624	14.8733	11.744	12.6506	10.1906	11.4861	cluster_1
shyg3203	13.3568	13.064	13.5998	11.9191	10.8625	10.5887	11.8536	12.0853	11.5157	9.52938	9.23335	12.6716	cluster_1
shyg3205	14.1041	14.301	15.8096	15.9023	15.6524	15.6807	15.1221	15.464	15.4817	14.9519	14.0475	13.5306	cluster_2
shyg3207	10.0989	12.0243	11.794	10.3258	13.0839	13.0446	14.2709	14.2266	14.1608	12.6085	14.7184	13.4567	cluster_4
shyg3210	18.1358	6.1009	0	0	7.05532	6.19827	8.08013	7.97	6.47701	10.3939	11.3365	8.42031	cluster_3
shyg3215	0	12.097	9.26832	10.0667	8.61868	7.01127	8.28776	10.2351	7.87029	10.8491	9.6778	14.6138	cluster_4
shyg3219	0	9.7396	8.67719	5.76297	4.00827	6.83453	8.90768	7.35667	9.95643	8.06887	7.59266	8.33805	cluster_4
shyg3220	8.57745	14.5776	13.1804	9.77284	8.83935	8.87615	10.4317	9.74548	9.42353	7.10089	7.12822	5.90949	cluster_1
shyg3221	14.2467	14.6683	16.2268	15.6669	14.9151	14.1807	13.7241	13.5093	12.3825	10.9563	10.8131	10.7042	cluster_1
shyg3222	14.664	13.1702	13.7376	11.7516	11.8442	10.5933	12.57	13.2142	12.3296	11.2329	8.39835	9.43236	cluster_1
shyg3223	13.3333	13.5321	13.034	12.7228	11.1861	10.4834	10.5231	10.3446	9.77539	9.38219	8.9744	8.65049	cluster_1
shyg3224	0	0	0	0	8.39799	7.32311	7.92161	10.998	11.7354	12.1681	14.3782	13.7695	cluster_4
shyg3234	9.32966	8.65771	10.7567	0.226032	3.81525	3.67507	3.99875	3.92553	3.81496	13.3469	1.18427	0	cluster_3
shyg3235	0	11.8842	10.871	10.06	0	0	0	0	0	19.2064	11.7934	12.779	cluster_3
shyg3236	0	0	0	0	0	0	0	13.0789	10.3569	19.2596	0	0	cluster_4
shyg3237	0	11.8876	5.73069	1.72661	0.680211	0	0	4.49932	0.409329	6.05792	9.96705	10.5022	cluster_3
shyg3241	14.4922	10.7132	9.50216	7.89745	7.96471	5.79844	8.18448	8.58182	6.43432	16.8936	7.3768	0	cluster_3
shyg3258	0	12.0349	9.36399	6.59073	0	6.58871	0	0	0	0	7.22558	0	cluster_1
shyg3259	0	14.5558	0	14.2398	12.7353	16.461	0	15.6683	0	0	0	0	cluster_2
shyg3261	13.8931	16.7911	0	9.41687	10.421	0	0	0	0	0	0	0	cluster_1
shyg3263	0	0	4.65846	0	0	4.467	6.15479	6.63222	9.31916	9.12168	10.7816	12.1134	cluster_4
shyg3271	0	0	0	0	0	5.31293	8.64986	10.3827	12.1213	11.9839	11.0622	12.0066	cluster_4
shyg3274	0	0	0	0	0	0	0	0	0	8.73161	8.95845	0	cluster_4
shyg3292	12.8635	11.6863	5.3346	4.14529	7.08884	9.44266	10.6136	11.0972	11.412	13.5845	13.691	14.1282	cluster_3
shyg3293	12.0779	13.7456	14.2857	12.7271	13.2326	10.3189	10.7856	11.3656	9.61506	9.91069	8.93053	0	cluster_1
shyg3295	0	6.74568	0	0	0	0	0	0	0	0	9.04422	0	cluster_3
shyg3297	9.52244	10.767	11.1523	10.998	12.0685	11.5507	12.5118	11.9452	10.9219	11.7994	11.0086	11.865	cluster_2
shyg3300	7.49773	8.48746	6.50025	6.36386	7.39336	2.73456	4.96134	5.46785	5.35558	6.06513	6.52471	6.79077	cluster_3
shyg3349	9.05131	6.19628	6.48981	7.53469	7.03762	8.40525	10.4279	10.8607	11.6452	12.3659	13.3727	11.7136	cluster_4
shyg3355	6.49982	2.15213	0	4.97424	6.65383	4.93355	8.36627	7.87586	7.4549	9.05379	10.9651	13.4064	cluster_4
shyg3366	15.4227	12.6594	12.1007	9.69276	10.0451	6.18396	0	0	0	0	0	0	cluster_1
shyg3377	13.5734	13.0385	13.6167	14.1445	13.3048	12.7302	12.9646	12.7759	11.8723	11.1445	10.0571	8.63053	cluster_1
shyg3378	8.04942	0	0	3.95529	11.6743	13.9866	14.6587	14.3079	13.2055	12.828	11.9718	11.775	cluster_4
shyg3379	7.45389	0	6.73906	9.87136	13.7549	15.3985	16.3436	16.6481	16.7747	17.4927	17.8944	18.2617	cluster_4
shyg3380	4.66524	5.15348	0.262628	7.65901	9.69684	9.59145	8.11956	8.20891	7.2542	9.54314	12.1115	7.08863	cluster_4
shyg3382	7.06391	5.75439	9.98745	9.71068	7.35264	6.93804	5.3848	5.2415	8.60113	9.08733	4.34652	5.67197	cluster_1
shyg3386	12.2868	12.8524	0	0	9.17214	0	9.89817	10.4216	10.0319	12.3461	11.4388	12.5636	cluster_3
shyg3389	14.5877	0	7.12889	0	6.99649	7.57454	9.73578	11.5566	16.3687	17.3623	18.0969	0	cluster_4
shyg3394	10.1535	12.0037	14.0118	13.1654	13.379	10.7499	11.0681	10.905	10.8827	9.62549	8.46441	9.65884	cluster_1
shyg3395	0	7.95267	0	7.33346	0	4.48428	0	6.72719	11.1402	11.1691	7.56313	9.93713	cluster_4
shyg3399	0	12.3164	10.5305	10.1937	9.96971	9.77868	9.91118	12.768	9.23301	9.94837	10.3585	12.2399	cluster_2
shyg3400	15.7896	13.8178	8.95587	12.2001	0	0	0	0	0	0	0	0	cluster_1
shyg3401	0	0	0	0	0	0	13.0174	15.4312	14.2243	0	0	0	cluster_2
shyg3403	0	0	0	0	7.14091	10.3507	0	0	0	0	15.7974	0	cluster_4
shyg3405	8.17241	9.39943	10.4094	9.78947	11.3234	12.0332	13.2832	13.3448	10.9516	10.915	10.123	8.91952	cluster_2
shyg3409	14.4089	10.8739	7.21802	10.2441	0	0	0	0	0	0	6.66393	0	cluster_1
shyg3412	0	0	0	5.99158	9.94963	14.9018	13.0179	15.0329	16.6826	15.7996	16.9383	15.5226	cluster_4
shyg3414	15.9756	12.7934	11.92	7.58789	9.33032	6.40586	8.13672	0	7.45532	0	7.3395	0	cluster_1
shyg3416	16.4611	14.4297	13.9624	11.1153	10.7184	11.1973	13.0873	13.0301	10.5988	10.7957	8.73653	9.35717	cluster_1
shyg3417	8.16091	8.97893	9.00385	6.64108	8.03656	9.37395	11.2368	10.6458	11.4422	11.5536	11.2216	9.67666	cluster_4
shyg3419	6.30949	10.5893	7.64635	6.86674	8.32814	8.95968	8.48951	7.52868	9.2005	7.5516	7.08904	0	cluster_2
shyg3420	12.5019	11.5663	13.5272	11.727	8.36944	10.6732	9.0092	6.5096	7.59986	6.58579	6.94018	6.90139	cluster_1
shyg3421	0	6.1204	6.3604	7.81803	8.70448	8.48856	6.9741	6.9869	10.0181	6.97782	15.5504	16.7245	cluster_4
shyg3428	0	0	0	0	0	11.6531	11.424	11.0864	11.7169	12.1412	13.6571	14.313	cluster_4
shyg3429	9.78013	13.4527	14.2982	13.8669	12.8442	12.7808	12.5949	11.17	11.2921	9.54589	8.27484	9.5106	cluster_1
shyg3430	13.7083	13.175	13.4441	11.9304	8.24358	9.16161	9.50596	11.0801	8.82458	9.22883	8.97269	7.75439	cluster_1
shyg3443	11.5508	11.8612	12.91	13.4103	12.4091	11.576	10.0981	10.1765	9.35396	9.16991	9.06504	8.59997	cluster_1
shyg3451	0	13.7864	13.4289	9.24824	8.87008	11.6923	12.3974	13.7718	12.0907	0	11.7028	0	cluster_2
shyg3452	8.90154	12.0294	13.9708	11.3591	10.5558	11.3335	10.7445	10.9227	8.89513	8.85807	11.4554	11.773	cluster_2
shyg3453	11.6216	11.8854	9.60281	9.48481	4.98561	6.15309	8.2255	6.33963	7.6218	0	11.5965	7.12254	cluster_1
shyg3454	15.317	7.54857	11.6859	13.9137	0	0	0	0	0	0	0	0	cluster_1
shyg3456	0	0	0	0	9.76623	7.48602	15.1666	0	17.0091	17.5652	16.0456	17.0942	cluster_4
shyg3457	9.51398	11.7528	12.3748	12.0115	11.903	13.3392	14.777	15.444	15.6327	15.4602	15.5525	15.4482	cluster_4
shyg3460	13.0989	14.3228	12.8856	11.4988	11.0358	10.845	9.90608	9.21139	11.5451	11.3555	11.4149	11.0605	cluster_1
shyg3462	15.2662	11.9506	10.4316	8.34719	10.0618	10.2354	8.85551	11.0334	8.76249	9.1945	10.0179	13.7384	cluster_3
shyg3463	16.5828	11.8599	10.1739	0	0	0	0	7.05854	0	0	0	0	cluster_1
shyg3464	12.0686	14.0967	14.8024	13.5567	13.5183	13.3785	13.1217	13.9551	12.4329	12.1907	11.9806	10.6117	cluster_1
shyg3465	15.2458	14.6887	15.4705	15.0004	11.52	12.214	13.9347	13.537	12.9842	11.1503	10.8181	8.7056	cluster_1
shyg3466	16.8731	15.7758	16.0877	15.5722	14.9474	14.5019	15.2476	14.5259	14.0325	13.4948	12.8596	12.7975	cluster_1
shyg3467	9.67838	11.599	12.5012	10.4533	10.226	10.4686	11.4887	10.4647	9.92378	9.82446	8.24815	6.84435	cluster_1
shyg3468	11.8297	9.61384	12.1191	10.5741	11.6212	11.4604	11.1688	12.5172	11.656	11.4609	12.6928	11.7581	cluster_4
shyg3471	9.82603	11.8301	11.9674	12.001	12.0188	11.9897	11.2496	9.85989	9.85573	8.92346	10.9374	10.2568	cluster_2
shyg3477	15.261	12.343	10.8413	8.27029	10.4421	12.0602	12.2138	12.3538	12.2868	12.8604	13.5617	14.8814	cluster_3
shyg3479	10.7116	11.4546	11.2234	12.7046	13.7939	12.3431	12.6942	12.2231	13.8799	13.8261	15.2988	14.6893	cluster_4
shyg3480	18.295	18.1424	18.4617	17.6811	16.8773	16.885	16.6802	16.9148	16.2584	16.0896	14.887	15.6248	cluster_1
shyg3482	9.70752	12.5803	13.8259	12.4038	13.0697	13.4555	14.205	14.3298	14.2233	13.6677	12.5437	11.8338	cluster_2
shyg3485	9.32669	10.9035	11.4544	11.3474	11.0093	10.345	9.60246	10.119	8.5307	8.34668	7.43645	6.57814	cluster_1
shyg3486	0	8.77897	10.667	7.97708	9.67727	8.20499	11.3312	11.3214	11.3444	11.3829	9.93449	9.3679	cluster_2
shyg3487	8.12095	8.38069	8.24341	7.96512	7.87945	9.9048	9.91599	10.1252	10.3773	10.1153	10.4142	9.53671	cluster_4
shyg3488	15.9306	14.7741	14.7447	13.8669	13.4193	14.3101	14.6997	14.8303	14.7507	14.4742	14.4245	13.2244	cluster_3
shyg3489	16.0077	14.7382	14.5908	16.5678	16.5804	16.3934	16.5436	16.4703	16.1363	15.3954	14.1079	12.9232	cluster_2
shyg3490	13.4931	14.0918	14.1148	12.4228	11.4857	11.1427	11.0671	11.0432	8.58484	9.48357	7.66638	7.42821	cluster_1
shyg3492	0	0	0	0	0	0	0	15.6692	16.0766	15.5834	15.2825	17.2969	cluster_4
shyg3495	15.4873	0	12.3427	11.7156	14.3567	15.3014	15.8495	15.5609	14.7038	16.1033	14.9389	14.544	cluster_4
shyg3497	9.66011	10.1392	10.8811	11.2494	7.8278	4.06403	9.47666	5.88101	3.61644	9.52143	6.71479	0	cluster_1
shyg3498	8.15783	9.87466	9.54576	7.78202	8.28287	8.85298	10.9338	11.5812	12.612	13.1969	15.2463	15.9112	cluster_4
shyg3500	0	0	0	0	0	0	0	0	0	0	10.7294	0	cluster_4
shyg3502	16.9533	18.0834	18.1495	17.6461	17.7876	17.6162	17.6764	17.4982	17.2667	17.1392	17.0857	16.8047	cluster_1
shyg3504	10.5128	13.9511	14.6761	15.1061	13.4164	12.8636	12.7113	12.3032	12.2988	11.6041	13.0156	12.9926	cluster_2
shyg3509	12.2918	9.54167	10.5068	10.0885	9.38176	9.42115	9.57946	9.57528	9.64636	10.4087	9.53723	8.66957	cluster_3
shyg3511	9.50525	11.0631	13.9009	14.381	14.4879	14.7084	13.6391	12.7859	13.4617	11.879	11.7739	11.2762	cluster_2
shyg3512	9.28871	9.09612	9.49702	9.63472	13.6171	9.81006	9.58127	0	0	0	0	0	cluster_1
shyg3515	8.55251	12.862	14.4897	12.7975	10.0626	6.35836	8.131	6.53444	6.81281	6.67176	7.34067	6.46764	cluster_1
shyg3525	10.785	12.876	11.9859	12.5422	13.3496	14.7321	15.1795	15.5686	16.8243	17.2577	18.5713	18.046	cluster_4
shyg3540	0	9.35471	9.16561	8.60652	6.88145	0	0	0	0	0	0	0	cluster_1
shyg3543	0	0	0	0	0	0	0	0	9.78892	0	12.765	11.5886	cluster_4
shyg3546	16.2159	14.3912	14.074	12.2145	11.42	12.2151	12.6095	13.3931	12.9163	14.6096	15.289	15.7992	cluster_3
shyg3547	11.888	12.3419	12.0668	13.278	13.3921	14.5434	14.9548	15.0646	15.3735	15.4545	14.3112	15.0836	cluster_4
shyg3548	5.65776	3.04454	9.42491	6.14663	2.68194	7.21138	4.72507	6.73484	7.97852	7.92835	8.06363	9.87808	cluster_4
shyg3555	0	0	0	0	0	9.62633	0	14.8448	15.4785	0	14.6962	0	cluster_4
shyg3556	0	0	0	0	7.65412	9.75217	10.7442	0	12.7337	0	15.8363	14.218	cluster_4
shyg3579	5.46327	5.64305	5.84132	7.22018	12.6441	15.115	15.414	15.3504	14.7432	11.3798	11.195	11.6199	cluster_4
shyg3580	14.7575	13.7531	13.8924	12.1606	13.0028	11.7638	10.2391	11.1996	11.9341	12.3107	14.0277	15.3492	cluster_3
shyg3587	0	6.42444	0	0	0	7.23299	7.91755	10.6972	10.4191	12.3764	12.8857	13.5107	cluster_4
shyg3594	0	0	0	5.74434	8.61577	7.57989	8.43751	10.2085	6.57505	0	10.2531	12.4241	cluster_4
shyg3612	14.8908	14.3613	14.9648	15.7048	15.3871	15.8828	15.4825	15.34	14.3605	14.6583	13.7646	13.4538	cluster_2
shyg3629	0	16.3725	17.305	15.6926	15.8309	15.3766	15.4362	16.6346	14.3349	14.1492	14.1273	14.1161	cluster_2
shyg3637	12.6905	13.1566	13.7546	13.5288	9.71498	5.88729	6.01576	4.02563	4.36212	5.95716	7.01833	3.81937	cluster_1
shyg3638	0	12.1101	12.3061	9.45466	5.85232	8.4743	8.24182	10.3494	8.83262	0	0	11.9274	cluster_2
shyg3645	0	0	6.30494	2.59843	0	3.88044	5.185	0	5.17382	12.6478	9.935	13.5929	cluster_4
shyg3647	0	0	0	0	0	0	0	0	0	9.41188	9.10764	10.7563	cluster_4
shyg3648	0	0	0	0	0	0	0	0	0	14.2757	10.9355	13.2134	cluster_4
shyg3650	0	0	0	0	0	0	0	0	0	15.6008	15.8912	16.9693	cluster_4
shyg3651	0	0	0	0	0	0	13.9508	14.3352	14.0772	16.2942	16.7262	15.1856	cluster_4
shyg3653	9.33155	10.7796	12.4752	11.8632	12.2604	11.2888	10.9514	12.9887	12.5008	12.4991	11.9882	12.0432	cluster_4
shyg3655	18.5961	5.43889	9.98672	9.93481	10.0612	13.8487	14.5801	14.3665	13.623	13.8848	13.0537	13.5968	cluster_3
shyg3656	11.3582	12.4783	12.9351	13.0234	14.9617	15.0757	14.4003	14.1086	14.4203	13.3546	12.4558	12.6217	cluster_2
shyg3657	8.58965	10.4103	12.1003	9.99483	10.9213	12.4775	12.5491	11.4012	12.4439	10.4581	11.7515	6.77616	cluster_2
shyg3662	18.3591	0	0	0	0	0	0	0	0	18.3995	11.5876	0	cluster_3
shyg3677	9.60353	8.88824	9.83618	10.6599	12.7198	12.8094	9.78096	8.32698	9.327	8.26758	9.03067	11.9975	cluster_2
shyg3687	0	0	0	0	0	0	0	11.4075	9.11055	10.7369	9.27463	0	cluster_4
shyg3689	0	0	0	0	5.81353	10.3507	0	13.1984	12.8085	15.0479	14.4036	13.6776	cluster_4
shyg3691	0	0	0	0	0	0	6.23523	9.11498	6.4139	10.2817	8.98286	9.73303	cluster_4
shyg3692	7.36586	0	5.2958	5.09114	4.75408	7.96322	4.75383	4.76253	10.7477	12.6777	14.5734	13.3655	cluster_4
shyg3693	14.9513	12.2764	6.112	6.34442	8.85226	7.33346	10.6895	10.3144	12.2692	12.9511	16.4301	15.3741	cluster_3
shyg3695	4.98031	4.58097	6.34997	3.18622	4.10004	5.24243	5.97036	8.17221	9.07047	10.1762	9.24121	11.131	cluster_4
shyg3703	5.48107	3.36288	3.42638	3.05131	5.03076	4.95806	6.40173	7.14831	8.63979	10.29	12.7607	12.453	cluster_4
shyg3704	18.5498	6.41097	0	0	7.85143	6.68969	7.9183	9.2151	7.18939	9.75921	6.1393	0	cluster_3
shyg3725	11.3442	8.47119	10.6801	9.1695	6.08292	5.81764	6.88787	6.81663	6.19426	9.3039	6.70725	5.99736	cluster_1
shyg3733	0	0	0	6.39714	7.94184	10.3614	12.2509	12.7042	11.7487	12.2282	0	0	cluster_2
shyg3745	0	4.56375	4.77444	4.50358	4.75399	7.67155	8.04564	7.9291	11.4482	11.5012	15.1232	15.2186	cluster_4
shyg3748	13.5444	11.1921	12.3004	9.71542	10.3967	6.97995	7.88242	13.7701	14.9421	15.0165	14.8772	16.129	cluster_3
shyg3755	17.1948	16.4497	15.2388	11.4608	9.21038	9.36949	7.79504	0	0	17.3244	0	0	cluster_1
shyg3756	15.8878	16.8092	16.7901	15.9952	15.5128	15.7643	16.3354	16.062	16.5082	16.7805	16.6554	16.3515	cluster_3
shyg3757	16.0205	15.8557	14.5088	12.6262	12.6224	12.0915	12.5656	12.5794	9.95275	12.1069	8.14962	10.0425	cluster_1
shyg3758	8.38453	7.83635	7.08905	3.89119	3.56708	4.36055	6.64955	7.10305	5.93953	8.16804	8.23442	6.83168	cluster_3
shyg3759	0	13.9848	13.9316	11.918	10.6873	12.9866	12.594	13.257	12.5087	0	10.4897	0	cluster_2
shyg3763	18.1711	11.7235	11.7283	8.93401	8.68778	0	5.4719	0	0	0	0	0	cluster_1
shyg3764	2.6076	3.73375	3.83652	3.089	3.5746	6.05908	6.74741	7.8585	9.28245	10.4901	12.2608	12.1107	cluster_4
shyg3765	14.043	15.5775	15.963	16.4345	14.7757	14.609	13.4857	12.0526	11.6811	11.5589	11.3353	12.5978	cluster_1
shyg3766	13.3217	7.41777	9.53179	3.75796	0	5.73063	10.2843	10.3381	8.14425	0	0	0	cluster_1
shyg3768	0	9.67086	9.14634	7.26433	8.941	10.6116	11.7092	11.8729	15.9489	16.4359	17.6161	17.8162	cluster_4
shyg3770	13.2791	15.4961	16.1701	15.2646	14.9249	14.9592	15.0795	14.7155	11.6974	11.5819	10.8667	10.8858	cluster_1
shyg3771	14.076	13.4906	15.5425	13.9659	12.601	12.7701	10.8617	10.7343	10.2217	8.96715	8.95716	0	cluster_1
shyg3773	11.4126	12.2503	12.7437	10.0405	11.2374	6.94662	11.8862	0	0	0	0	9.37166	cluster_1
shyg3774	9.77197	12	12.7607	9.33063	9.44718	8.60625	10.7011	11.1481	13.461	14.2965	15.2737	15.8706	cluster_4
shyg3776	0	13.9915	14.133	11.4299	12.2478	13.7129	14.0312	14.3812	16.7679	0	0	0	cluster_2
shyg3778	0	12.3045	12.3094	11.9993	11.5373	11.5714	11.3245	12.1405	10.055	11.6253	0	0	cluster_2
shyg3789	15.6586	14.9584	14.4804	12.8699	13.8245	14.2867	15.9598	14.4781	16.0707	16.1682	16.1611	15.4983	cluster_3
shyg3791	0	0	0	0	0	0	0	0	0	8.63437	11.2657	11.7962	cluster_4
shyg3799	11.8689	13.5199	11.0616	0	0	0	0	0	0	12.8841	0	0	cluster_3
shyg3804	18.4753	19.921	0	0	0	0	0	0	0	0	0	21.2812	cluster_3
shyg3805	0	0	15.3404	15.5837	18.0421	19.9582	15.9199	20.113	0	0	0	19.726	cluster_2
shyg3806	10.3647	11.4432	11.3713	6.38715	5.27505	8.40503	9.36047	10.8824	7.42449	9.86102	6.26941	0	cluster_1
shyg3812	12.9896	13.6477	14.0636	14.4577	12.7894	11.6514	11.3504	10.4794	10.9687	10.5187	11.3388	10.8407	cluster_1
shyg3814	11.6805	12.164	12.1931	11.0117	9.52098	9.76975	9.31004	10.3342	8.10767	8.67932	7.56911	7.2939	cluster_1
shyg3815	15.5979	15.8208	15.5541	15.0946	14.2895	13.1485	13.3749	13.1186	13.1238	12.5608	12.4795	11.7572	cluster_1
shyg3816	9.94888	10.6243	7.91163	6.368	7.51825	9.64233	9.10963	8.9718	10.896	10.8965	9.44105	12.1591	cluster_3
shyg3820	9.90733	11.6477	11.8329	10.8896	12.7147	11.9304	13.5437	12.3129	12.6443	13.4381	12.915	15.1417	cluster_4
shyg3822	0	0	0	0	0	0	11.5435	11.6805	11.8399	12.8496	15.2131	13.4963	cluster_4
shyg3832	0	0	9.02633	10.6838	9.25736	10.7398	6.8919	0	7.29699	0	0	0	cluster_2
shyg3833	7.32705	7.4574	7.09823	7.75921	7.52513	8.54719	9.14101	10.1027	10.7547	10.3178	12.4376	11.0367	cluster_4
shyg3835	17.7212	10.535	12.5775	11.0461	8.43562	9.6479	11.3131	11.1648	12.4706	12.3529	14.8785	14.1175	cluster_3
shyg3836	11.5705	12.7798	14.7745	13.5836	12.3497	12.8983	12.5501	12.8991	11.4938	10.9027	11.2394	9.53591	cluster_1
shyg3837	11.3778	8.42279	7.24367	4.62717	7.29758	7.23305	9.17198	9.55735	8.62415	8.2478	9.86516	10.5801	cluster_3
shyg3838	6.58254	7.51747	6.88146	5.41324	6.41569	8.12482	9.26437	9.64853	10.8509	11.9899	13.907	14.1956	cluster_4
shyg3840	4.13718	5.59772	2.41478	1.41874	2.97722	2.59085	4.82795	5.16986	2.92069	2.88916	2.29073	2.99314	cluster_3
shyg3845	6.58255	6.50612	6.87349	8.38219	9.88611	9.59615	10.475	12.1572	12.803	13.5761	13.6063	14.2516	cluster_4
shyg3848	7.98883	8.45883	8.87096	10.0468	8.35488	8.98027	9.43361	7.25833	8.61458	13.4004	13.0824	13.2268	cluster_4
shyg3849	10.2047	9.38263	10.6075	10.7208	9.62526	8.09488	7.3197	4.89757	5.94518	6.98674	8.5685	5.62958	cluster_1
shyg3855	15.6281	16.1232	17.0425	16.8427	16.9962	17.1543	16.9196	16.9223	16.7775	16.9375	16.622	15.7429	cluster_2
shyg3859	7.98122	12.0161	13.2161	13.0791	11.3124	10.4481	10.2487	10.5424	10.8724	10.0157	9.55463	10.9313	cluster_2
shyg3860	12.0287	11.2274	9.86202	5.98042	7.15645	0	9.40647	10.6172	10.7191	10.9795	12.9402	16.5412	cluster_3
shyg3861	15.6474	13.0765	11.0385	6.88587	4.54244	6.25225	7.98854	8.99972	6.92712	0	6.122	7.95723	cluster_1
shyg3863	11.2132	12.0545	12.5938	11.8506	11.3126	11.9228	12.1653	12.8192	12.4432	12.2158	11.8196	12.4841	cluster_4
shyg3864	0	5.02425	0	0	7.99819	8.83658	10.3836	10.9158	9.5869	10.8124	12.2851	13.2994	cluster_4
shyg3866	7.33584	9.03053	10.4546	7.73636	5.00955	8.8033	8.67432	8.39927	8.2599	8.02341	7.08585	8.44054	cluster_3
shyg3867	15.7515	16.2735	14.6358	14.5363	17.4532	17.3343	16.1491	17.3395	16.888	16.7933	12.4757	16.7099	cluster_2
shyg3870	12.9545	10.9782	7.1837	0	2.40565	3.87746	5.07956	5.65581	9.47706	9.71108	4.84728	12.1421	cluster_3
shyg3871	11.9872	10.7188	9.13624	9.24902	7.81442	10.3367	11.3411	12.7713	11.2623	12.1326	11.755	13.614	cluster_3
shyg3872	0	0	0	0	8.62745	7.44327	9.51129	10.4205	7.96046	10.3809	8.7696	12.046	cluster_4
shyg3873	8.57128	5.15844	6.81738	4.96575	3.53187	6.72669	7.76694	8.23969	7.59956	11.6628	12.2227	11.7412	cluster_4
shyg3876	8.17284	8.03037	11.9249	11.4119	12.5539	12.0181	11.8501	13.1764	12.5734	11.4332	11.1658	14.0324	cluster_4
shyg3879	0	0	0	0	0	0	6.42477	0	0	11.1365	0	0	cluster_4
shyg3881	15.5623	14.4468	13.5412	12.999	13.1483	13.4109	13.9634	14.4271	12.9798	13.2281	12.649	12.7234	cluster_1
shyg3883	9.07258	9.97585	8.52242	10.6501	10.5273	8.7069	9.92827	8.89651	9.01697	12.5037	12.8981	13.0677	cluster_4
shyg3885	0	0	8.4637	4.06168	9.5367	9.54902	0	11.6316	0	0	0	0	cluster_2
shyg3887	13.5059	15.9641	14.7575	13.7924	13.6377	14.3186	14.4019	14.8382	14.5723	13.9583	12.8052	10.6006	cluster_1
shyg3890	19.3122	9.52396	6.67761	9.32652	7.05114	0	9.27118	7.4022	0	17.0812	0	20.5663	cluster_3
shyg3891	7.80012	8.137	7.69332	5.36848	4.57992	7.29038	5.3415	5.26111	4.84712	5.07985	6.80641	8.83062	cluster_3
shyg3893	0	7.23399	8.38764	0	0	0	0	0	0	0	0	0	cluster_1
shyg3894	15.4835	15.1712	0	0	12.2872	13.9886	0	0	0	0	0	0	cluster_1
shyg3895	0	0	0	0	8.54461	9.13322	0	0	0	0	11.0841	0	cluster_2
shyg3897	11.9775	12.0777	11.5421	12.0992	10.175	7.7771	9.12884	0	9.58109	0	9.58077	0	cluster_1
shyg3902	15.4244	10.2535	9.24827	7.02221	3.32978	4.01024	2.92887	7.55845	2.50552	9.48395	7.25762	7.12839	cluster_3
shyg3904	7.09421	9.8875	11.0761	11.3556	11.207	9.67042	8.56842	9.89376	11.5548	10.1564	12.9227	10.8416	cluster_4
shyg3908	9.43983	10.9726	10.0983	8.69885	7.21559	8.50606	7.41205	9.90986	8.01931	8.08236	8.95641	7.41545	cluster_1
shyg3910	6.44894	6.94972	0	3.42056	5.62117	4.29641	5.03076	4.90077	7.86355	5.12162	5.02012	4.01246	cluster_3
shyg3911	8.53476	6.76485	5.5411	5.05425	8.57484	6.02536	7.0754	10.7988	9.79629	15.111	13.4458	12.5508	cluster_4
shyg3912	10.6557	11.6676	9.95683	11.2214	10.0822	9.02533	7.90067	8.0776	10.0922	8.3952	9.30295	8.96775	cluster_1
shyg3915	0	10.1535	10.1521	6.83854	12.2297	11.0041	13.1416	14.5507	14.1496	15.3115	10.9801	15.4026	cluster_4
shyg3916	12.6124	12.6123	12.3584	11.5593	11.3624	11.2272	10.8585	11.4124	10.5696	11.2199	10.3434	11.8663	cluster_1
shyg3917	14.5364	12.7057	11.8359	10.0726	7.18092	9.02723	8.20683	8.82647	7.1599	9.12933	8.8612	8.13875	cluster_1
shyg3920	0	0	0	0	0	0	0	0	7.96102	0	11.1372	11.6477	cluster_4
shyg3921	9.53466	9.82315	9.83273	8.93462	8.91882	9.49925	10.4435	10.9511	10.7337	10.7631	11.602	11.8454	cluster_4
shyg3929	0	14.997	15.2688	14.0044	12.7646	13.0637	13.4811	14.9693	13.9024	0	15.8724	16.0388	cluster_2
shyg3930	17.8524	17.0423	12.0259	0	6.77159	0	11.8851	0	0	18.4713	11.7041	0	cluster_3
shyg3935	13.3709	13.9709	12.7793	11.4282	10.1658	5.69011	2.59811	4.57928	3.51757	2.37783	1.80496	5.61457	cluster_1
shyg3936	11.871	12.0332	13.3881	13.8386	12.4577	9.26396	7.40322	5.79241	6.10404	3.55255	4.78751	3.75509	cluster_1
shyg3937	15.8519	16.7433	16.1846	15.3433	12.9088	9.39293	6.98738	7.05781	3.71747	6.88865	3.70453	7.4475	cluster_1
shyg3938	14.6826	14.8005	15.0407	15.5375	14.2061	11.196	8.591	9.08644	7.73144	6.6625	8.238	6.7572	cluster_1
shyg3940	15.7792	12.7791	6.3282	0	0	0	5.6499	0	0	0	0	0	cluster_1
shyg3941	8.56441	7.05745	7.04686	6.20045	6.34233	5.7475	6.50222	7.33885	0	0	6.24959	6.80492	cluster_1
shyg3945	0	14.7473	15.9917	13.3786	10.9629	12.6483	14.8368	0	0	0	0	0	cluster_1
shyg3947	0	13.2177	8.12204	6.32703	4.74857	0	0	0	6.63812	0	10.32	0	cluster_1
shyg3957	15.3508	11.962	9.35867	7.81809	5.55671	6.75125	9.23305	10.7595	8.40975	12.7085	12.8352	13.2967	cluster_3
shyg3959	10.9308	12.5331	13.7077	13.8391	14.0227	15.0182	15.2647	15.1659	14.5352	15.1411	11.9223	14.7799	cluster_2
shyg3961	0	10.5398	9.86907	6.64432	6.40064	6.87347	5.92599	0	3.56249	15.8804	11.5892	6.9872	cluster_4
shyg3965	0	10.527	6.86072	8.73809	8.92185	8.92458	9.54999	9.91915	10.6253	0	13.1231	13.5291	cluster_2
shyg3966	8.85686	9.34672	10.5574	12.1322	11.5704	10.2491	8.94409	8.6577	12.1827	9.14714	12.1386	12.0106	cluster_4
shyg3967	10.0728	15.118	13.5539	11.7639	8.31271	11.0336	11.3371	10.5866	11.5839	12.8222	13.2896	12.5042	cluster_3
shyg3968	0	10.096	6.15857	6.36356	0	8.13007	0	0	12.0583	16.4183	16.7067	17.4041	cluster_4
shyg3970	0	4.14811	0	1.41997	6.05708	7.97512	8.43008	6.41641	11.47	10.1316	10.6918	13.5539	cluster_4
shyg3971	11.8325	10.3636	10.5674	11.0259	10.5829	10.3752	10.7796	9.69032	9.09065	9.73711	9.72671	9.0978	cluster_1
shyg3972	17.2525	17.666	15.4085	12.0978	9.26404	10.9283	0	0	0	0	8.71414	0	cluster_1
shyg3973	9.52613	15.0384	16.052	11.1913	10.9789	7.96832	10.0158	10.0958	7.55708	8.30023	8.74062	8.26865	cluster_1
shyg3975	17.2769	18.2119	17.9593	17.8822	17.5757	17.3966	17.3775	17.6734	16.9692	16.4464	16.2451	15.698	cluster_1
shyg3976	8.9101	5.07701	5.42736	3.35323	3.4421	4.67266	5.61861	7.65283	7.30091	11.7493	9.67931	8.90615	cluster_3
shyg3982	12.3548	12.3285	10.7382	6.10637	9.91929	8.85879	8.94696	12.0125	10.2851	11.5641	10.2597	10.4499	cluster_3
shyg3990	13.0515	11.4846	4.87672	5.95796	7.24124	9.41278	5.76778	7.51328	0	0	0	0	cluster_1
shyg3991	0	0	0	0	0	0	8.25312	11.4229	12.0332	9.12319	12.1889	9.52099	cluster_4
shyg3995	10.2409	8.07929	6.36021	5.11939	5.45101	4.30707	5.23186	4.77057	6.01209	3.64308	6.84085	5.14058	cluster_3
shyg4000	9.21394	5.16206	6.69255	5.06648	6.06027	5.44296	5.77014	5.72481	7.92385	6.17156	0	0	cluster_1
shyg4001	0	12.5022	3.91079	6.92596	4.5457	5.68337	3.46254	5.16382	6.6067	9.15321	7.95776	9.70693	cluster_4
shyg4006	8.24531	10.0646	10.2816	9.9568	9.03085	8.16988	10.3231	9.13871	6.92663	4.44871	3.9646	4.31351	cluster_1
shyg4007	12.0079	11.2149	11.9244	13.9794	12.3298	10.6723	8.77751	9.95152	9.65837	10.7465	9.14494	8.59021	cluster_1
shyg4008	12.7207	11.0873	11.0651	11.7264	9.51379	9.31597	10.4248	9.67888	9.2977	9.19325	9.07684	7.51451	cluster_1
shyg4011	9.85261	10.9893	12.0625	12.3062	14.5221	15.1819	15.2991	15.4745	14.699	14.2658	12.9924	11.9654	cluster_2
shyg4018	11.8413	7.80892	1.52721	7.84028	7.95831	6.0656	1.86603	5.89945	4.6574	8.76351	1.52534	0	cluster_1
shyg4026	8.60965	13.1854	13.4936	10.2888	10.6814	6.91421	9.26218	9.32702	8.38676	6.82761	8.86046	6.29907	cluster_1
shyg4030	0	6.82373	4.08224	3.13341	5.37763	8.74295	10.4186	11.5915	10.7903	9.41193	9.49114	8.73279	cluster_4
shyg4031	11.0979	11.8617	13.0347	13.0731	13.8206	14.6888	14.6715	15.5686	15.9673	16.1184	16.8378	16.3399	cluster_4
shyg4036	0	12.2282	10.4745	4.81684	0	0	0	0	0	0	0	0	cluster_1
shyg4038	0	12.0459	12.7153	11.7265	11.9378	9.94691	0	0	0	0	0	0	cluster_1
shyg4039	17.1429	0	12.7157	8.15784	10.0418	11.3884	11.5119	0	0	0	0	0	cluster_1
shyg4040	0	9.40667	8.0326	6.47604	3.48873	6.19121	8.85688	7.43159	7.08162	0	0	0	cluster_2
shyg4043	11.7571	11.1234	12.3537	9.72468	8.63658	8.91183	8.33346	10.4541	9.13071	9.48483	7.01745	8.32655	cluster_1
shyg4044	0	17.1761	17.4177	13.2824	11.3587	12.173	12.7435	14.5553	15.0413	16.2941	17.1722	16.1194	cluster_4
shyg4045	0	12.2429	0	7.10359	8.72754	0	0	10.8173	12.3999	0	14.3561	14.1838	cluster_4
shyg4046	13.0206	12.7706	11.3766	8.85516	7.97737	8.56379	10.9666	10.4289	12.109	13.0617	14.1712	14.7128	cluster_3
shyg4056	0	6.21586	0	0	7.14398	0	10.0984	7.54649	0	10.0692	8.92859	9.70079	cluster_4
shyg4059	11.4897	12.4948	13.7017	13.5508	10.9544	11.3613	7.95669	9.41902	9.74482	9.59264	11.6837	14.0953	cluster_1
shyg4061	12.3362	13.0228	12.2264	15.7875	13.2744	17.9777	17.7308	18.4566	18.0183	14.6217	17.9692	15.8978	cluster_4
shyg4067	0	16.957	8.04675	6.87287	6.86379	7.22019	7.94501	9.98512	7.9227	11.9159	9.28297	0	cluster_2
shyg4078	0	10.6048	9.48381	6.59683	7.67194	8.76488	10.1779	10.7846	11.0629	11.1283	11.155	10.9516	cluster_4
shyg4079	15.2651	15.4425	15.5798	15.3977	15.4853	15.1382	14.9415	15.9473	14.5415	13.9791	13.5153	14.0184	cluster_1
shyg4081	6.97593	6.50553	6.99336	7.94313	7.45072	7.7599	6.61321	8.40853	9.39734	10.026	11.6398	12.1786	cluster_4
shyg4084	17.8245	16.9663	15.6206	13.418	10.6128	6.65302	8.87428	0	5.82838	16.239	8.69647	0	cluster_1
shyg4090	6.19823	8.4206	6.63571	5.97849	7.69623	5.8876	6.96804	6.17565	4.93509	6.26468	10.8041	7.82864	cluster_3
shyg4099	0	6.35787	0	0	0	6.6914	6.04241	8.49727	6.38329	10.6974	10.6619	10.471	cluster_4
shyg4102	0	6.98268	6.10858	5.90853	9.0617	7.15218	8.87532	9.15368	10.4577	12.8087	15.9683	13.4964	cluster_4
shyg4113	10.8008	11.429	10.4737	8.3653	8.4415	9.13507	9.00963	10.71	10.0767	9.42565	10.5086	10.1023	cluster_3
shyg4131	0	8.18313	8.82875	7.5826	6.44599	6.95788	9.81836	11.3615	10.0876	10.4221	12.8175	15.0088	cluster_4
shyg4144	7.7474	9.5617	6.92544	6.76152	8.05625	8.90006	9.50858	9.67063	11.6901	12.0835	12.3111	12.8054	cluster_4
shyg4150	5.32034	7.21471	8.50271	6.01438	4.97344	6.98303	8.00024	7.39821	9.22456	8.10684	5.9251	4.23544	cluster_2
shyg4152	0	0	0	0	12.692	14.1702	15.163	15.1111	15.5276	14.9469	14.5771	14.8293	cluster_4
shyg4155	4.20903	4.51362	2.31635	1.5227	5.6909	6.15377	6.44565	6.54153	9.50604	9.44338	13.6466	13.5016	cluster_4
shyg4157	7.07532	6.46915	5.20249	4.89974	10.0305	12.0077	8.91431	8.65319	8.66592	11.1253	10.3608	11.1906	cluster_4
shyg4166	0	0	0	0	6.88172	0	5.40394	7.25992	6.98155	10.3041	11.41	12.0173	cluster_4
shyg4167	10.4583	9.75059	10.5301	8.83906	7.22045	9.76063	10.1523	12.2734	11.2242	10.5271	10.5313	8.71896	cluster_3
shyg4190	0	4.05399	0	3.92702	6.30528	5.19806	9.17173	9.50332	10.2314	11.2725	11.8236	10.4307	cluster_4
shyg4191	18.5562	9.29182	0	9.69369	0	0	0	0	0	0	6.50312	0	cluster_3
shyg4199	0	0	0	0	0	9.64407	10.768	0	11.3311	12.1842	12.5077	14.5173	cluster_4
shyg4201	7.96341	9.78707	10.0914	9.48534	10.1833	9.84818	11.1863	10.8724	11.3501	11.3559	12.1182	10.8436	cluster_4
shyg4203	9.23527	10.8788	11.4322	11.8108	12.3128	11.8625	13.081	13.617	14.1869	12.0906	11.4111	14.0194	cluster_4
shyg4236	0	7.71748	0	0	0	0	0	8.3416	6.78958	0	0	0	cluster_2
shyg4237	6.74486	3.93672	5.83859	5.25266	3.78563	5.5958	5.52216	4.46411	6.19441	5.73173	2.25694	3.8957	cluster_1
shyg4239	0	0	0	0	7.22661	7.04049	9.31346	9.38069	11.2642	12.3442	14.9377	13.8006	cluster_4
shyg4241	9.40459	11.6711	11.944	11.2022	11.4852	11.8504	11.3659	11.0404	11.0572	10.0263	9.39611	9.51793	cluster_2
shyg4242	13.8925	14.1464	14.5611	14.6388	15.2379	15.2968	15.4834	15.571	14.468	13.9004	12.7768	12.94	cluster_2
shyg4248	9.20067	9.27892	9.44406	9.74596	10.1505	9.84426	7.84214	7.6745	9.27992	10.3787	9.34099	10.7422	cluster_4
shyg4255	17.043	17.241	17.4534	17.194	17.0312	17.2713	17.2985	17.3477	16.7144	16.6364	15.9704	16.1581	cluster_1
shyg4256	20.7325	19.2381	17.9719	16.7619	16.4431	16.9897	17.4626	17.0319	15.3942	15.4785	13.0937	14.2048	cluster_1
shyg4260	16.4356	15.2621	0	12.6211	11.2291	0	0	0	0	0	0	0	cluster_1
shyg4263	7.69158	7.75998	6.27977	4.10836	4.51681	4.90211	5.63308	5.57184	5.56515	6.28047	6.56933	6.2247	cluster_3
shyg4265	13.1162	9.78523	10.5696	6.05341	5.61735	6.21358	8.83376	11.4805	8.15067	9.24059	0	0	cluster_1
shyg4271	13.7977	15.1467	14.9333	13.6478	13.7121	12.7745	14.0295	12.4836	12.6277	13.1703	10.7441	12.7346	cluster_1
shyg4274	13.1087	15.4604	0	5.15476	0	0	0	0	0	0	0	0	cluster_1
shyg4279	9.28826	10.2877	10.315	9.29144	10.4039	9.50919	9.66655	8.70576	6.41238	7.14376	6.70077	7.82022	cluster_1
shyg4280	15.4763	15.3836	15.9462	15.521	14.7101	14.1421	13.8461	13.8816	12.7579	12.1001	11.1196	10.5155	cluster_1
shyg4281	17.4918	17.7162	18.8911	18.6315	17.9085	17.7652	17.5093	17.2772	16.6566	16.1568	15.5463	15.3654	cluster_1
shyg4282	0	6.82834	5.26279	6.8875	7.16272	8.51859	11.5784	7.90414	11.2084	12.4454	12.9898	11.8791	cluster_4
shyg4283	6.85605	8.77414	6.76354	8.2722	7.59148	7.71988	5.80716	5.61786	8.29081	6.2628	5.98429	5.51699	cluster_1
shyg4284	13.1024	12.8558	10.2344	8.28528	7.7141	8.04529	8.73514	7.68353	8.64571	7.56667	8.52708	11.2274	cluster_3
shyg4285	13.2626	13.6206	13.5958	12.5567	10.9814	11.014	12.0513	11.9081	11.1058	10.1489	8.8394	8.75063	cluster_1
shyg4286	13.573	12.4434	12.6332	12.6389	11.3069	11.1795	11.7924	12.1073	11.3977	11.2866	10.058	9.59697	cluster_1
shyg4287	17.7623	17.4243	17.4024	16.8819	17.0336	17.3275	17.3892	17.1844	17.3279	17.6527	17.8134	17.6047	cluster_3
shyg4288	14.6296	14.5504	13.7058	13.2032	12.5697	12.7802	12.1598	12.5814	11.7784	11.5238	9.2862	8.62704	cluster_1
shyg4289	14.5716	14.7199	15.8447	14.9971	14.3984	13.7684	13.2646	13.5222	12.4613	12.1908	11.0714	10.9738	cluster_1
shyg4290	19.5428	19.6602	20.1504	19.554	19.0938	17.3044	15.8687	15.7173	15.3796	15.4409	19.1768	19.9776	cluster_1
shyg4291	11.0504	12.574	13.3128	15.1243	12.386	13.9616	10.1291	10.1941	12.507	13.2283	13.5721	13.057	cluster_2
shyg4292	17.5473	16.8178	16.1714	15.3727	14.8378	14.7548	14.4911	14.7011	14.3074	15.452	13.868	15.1781	cluster_1
shyg4293	15.6588	16.7974	16.8445	16.0459	15.3281	15.1214	15.4762	15.5565	14.4667	14.7099	12.8134	11.5962	cluster_1
shyg4294	9.63215	6.50262	9.64404	7.36107	7.59769	10.0091	9.22594	10.2034	11.0218	12.6603	14.1615	12.9314	cluster_4
shyg4295	15.5849	13.9626	15.2929	15.8597	15.1839	14.8965	14.3993	14.83	12.9776	12.5778	11.1428	10.3495	cluster_1
shyg4296	16.824	12.2281	14.3224	11.4667	7.03985	8.64925	8.17118	9.43968	6.96373	7.67133	5.92435	1.07122	cluster_1
shyg4297	15.4111	14.0041	15.0303	14.4033	12.9719	12.1553	12.5201	12.4455	12.2472	12.4457	11.7123	10.2584	cluster_1
shyg4298	18.5564	18.3597	18.2734	17.9592	17.156	16.7486	17.1485	16.7698	16.1675	16.306	15.2226	13.5955	cluster_1
shyg4299	15.2811	15.5216	15.8873	15.2632	14.9667	14.5464	14.8026	13.977	12.9809	12.2396	11.5925	11.4148	cluster_1
shyg4300	15.3025	13.0196	15.135	14.5456	12.5977	12.687	13.2552	13.784	13.6575	13.6945	12.0578	9.89836	cluster_1
shyg4301	18.9484	17.9476	17.974	17.1769	12.5641	12.1573	10.0923	11.2583	10.104	13.4576	11.8358	12.713	cluster_1
shyg4302	13.5214	12.5061	12.6154	12.785	11.0437	11.9867	13.006	12.23	11.4408	11.3751	11.7428	9.88329	cluster_1
shyg4303	15.021	14.7378	14.9243	14.9264	14.5225	14.5564	13.965	14.0227	12.0994	10.3372	9.32138	8.49292	cluster_1
shyg4304	12.1848	12.3629	11.8521	11.4829	9.92912	10.108	10.6393	11.8174	10.8479	12.7362	13.1417	11.1567	cluster_3
shyg4305	14.1289	13.4285	14.4571	12.8885	11.2675	11.0314	11.7862	12.2409	11.3986	11.1585	10.3895	10.4052	cluster_1
shyg4306	14.4039	16.8449	15.5049	13.7482	12.2509	11.7485	12.5719	12.1109	10.1818	10.7476	9.0352	10.3083	cluster_1
shyg4307	17.6071	16.278	17.5047	18.1151	17.6553	17.5253	17.8604	17.2438	15.1199	14.5523	14.8697	13.1123	cluster_1
shyg4308	15.2539	14.6536	15.9073	14.3298	13.3513	13.5754	13.8749	14.3304	13.8869	14.6073	14.5276	15.3825	cluster_3
shyg4309	17.6468	17.8157	17.7377	17.7113	17.3271	17.1008	16.7125	16.8641	16.5751	17.0243	16.9805	16.9888	cluster_1
shyg4310	10.1618	5.12125	9.35911	8.4971	4.58566	3.56264	6.06247	4.46404	4.82714	6.19252	2.44218	2.34896	cluster_1
shyg4311	16.0066	15.1083	15.2063	16.1874	15.373	15.1996	15.0307	14.8622	13.4358	12.8684	11.4338	11.3451	cluster_1
shyg4312	16.4442	17.8724	18.4703	18.1314	17.4504	17.6024	17.2757	16.7579	16.374	15.5198	13.6525	14.3116	cluster_1
shyg4313	18.0555	18.1199	18.6642	18.5383	18.0356	17.7973	17.4994	17.5989	16.6661	16.7297	16.2357	16.0827	cluster_1
shyg4314	18.1386	17.5735	17.2774	16.4504	16.2541	15.6087	15.1624	14.557	14.318	14.4599	13.0849	13.3544	cluster_1
shyg4315	17.4053	15.6699	15.8949	15.3403	13.8078	13.3785	13.315	11.9841	11.8285	10.2178	11.3319	9.43882	cluster_1
shyg4316	17.1079	17.3373	16.8195	17.7249	16.5924	16.3229	16.1011	16.5493	15.9778	15.0087	14.464	13.8347	cluster_1
shyg4317	15.0075	14.6657	15.3639	14.7192	13.9813	14.0089	13.596	13.5742	12.5942	12.5817	11.1935	10.9235	cluster_1
shyg4318	15.7592	16.3728	16.066	16.1299	16.0368	15.9777	15.4803	15.6038	15.2462	14.3843	14.165	13.7739	cluster_1
shyg4319	12.5016	12.9884	13.7503	11.3035	9.81391	10.6463	11.6353	12.0377	11.0633	12.6326	12.853	11.6324	cluster_3
shyg4321	13.8542	13.254	14.3046	13.8691	13.1709	13.3754	13.3568	13.5733	13.4261	13.6024	14.0165	12.6208	cluster_1
shyg4322	14.8763	14.5487	14.9984	14.6725	14.0256	14.0632	14.3517	14.2735	13.8345	13.5036	12.9811	13.0331	cluster_1
shyg4323	16.9606	14.518	12.6853	11.8284	9.41634	8.40745	9.4676	10.4724	9.09354	9.91303	5.61126	8.07929	cluster_1
shyg4324	15.023	14.7629	15.4847	14.2755	13.2624	13.056	13.1423	13.1166	11.7433	11.4002	10.847	10.0285	cluster_1
shyg4325	11.2736	11.189	10.6925	8.80593	10.2072	11.879	8.09887	10.8734	9.32564	8.05815	9.75158	7.67799	cluster_1
shyg4326	17.7455	16.9366	16.8571	16.8549	16.5921	16.0581	15.9484	15.4204	15.2279	14.9412	14.8334	14.6284	cluster_1
shyg4327	17.9794	18.3334	17.9822	17.3979	17.251	17.1413	16.9552	16.8075	15.6632	16.6284	15.0369	15.41	cluster_1
shyg4328	14.8712	14.7719	15.4965	13.8141	12.9694	13.1499	12.5849	12.358	11.3777	11.5314	10.4754	10.7467	cluster_1
shyg4329	14.9443	0	0	0	0	0	15.5497	15.4317	14.9885	18.5507	0	0	cluster_3
shyg4330	14.6044	15.9953	16.1367	15.0955	15.3649	15.2022	15.3754	15.2276	14.3878	14.9179	13.7531	13.5769	cluster_1
shyg4332	12.8714	12.4674	9.76361	10.1535	8.19984	8.22535	7.92899	0	3.50675	13.7487	13.7783	0	cluster_1
shyg4333	15.3921	12.7336	13.8789	11.4927	10.3981	9.62199	9.44046	9.72316	0	12.0227	0	10.0666	cluster_1
shyg4334	17.888	15.5014	14.235	10.2334	9.35399	8.19368	8.31641	9.36506	2.73001	7.76497	0	8.34278	cluster_1
shyg4335	18.4337	18.5318	19.0049	17.4916	15.2812	10.762	8.81787	0	0	15.5938	13.1749	11.113	cluster_1
shyg4337	14.1796	15.8945	13.363	13.2322	14.0538	13.8237	13.4719	14.1884	12.4711	0	0	0	cluster_1
shyg4338	14.5949	13.4867	15.0287	12.7567	8.8773	9.45375	9.81992	10.1871	9.0092	9.8029	6.97453	6.77377	cluster_1
shyg4347	13.4772	13.4231	13.3993	13.2184	13.3317	15.0321	13.4496	13.49	17.5997	16.853	18.2527	18.2667	cluster_4
shyg4350	14.6151	2.44631	0	6.26063	0	6.88343	0	0	7.70123	0	6.3968	19.4646	cluster_3
shyg4351	0	0	0	12.991	10.0836	0	0	0	0	14.2608	14.3088	0	cluster_4
shyg4353	0	7.38857	7.42802	6.15102	6.81754	4.70902	7.58414	8.80363	8.47054	10.2945	11.8922	12.3002	cluster_4
shyg4354	15.8956	13.6698	11.7813	7.87815	6.78284	7.20323	11.4084	12.0722	13.0227	13.8833	16.3046	15.0215	cluster_3
shyg4355	16.2261	13.1946	12.4364	10.175	9.60283	11.4103	12.1007	12.5184	12.9953	15.71	14.1779	14.7818	cluster_3
shyg4357	13.9594	11.9433	9.96713	8.36626	5.38262	6.06157	8.07758	10.2773	6.49728	9.79224	10.735	13.248	cluster_3
shyg4360	0	0	0	3.82591	4.1329	6.91436	0	0	9.02547	0	12.5323	0	cluster_4
shyg4365	0	11.7148	8.27868	7.84347	8.07402	5.77601	7.36707	10.8454	9.7884	11.6172	11.2099	12.2077	cluster_4
shyg4366	5.93153	10.655	9.1086	9.5402	8.32223	8.98729	8.68109	7.38102	7.81812	8.30864	5.52218	6.66362	cluster_2
shyg4367	14.3398	13.5812	12.9642	12.5941	12.0555	11.3864	12.622	12.7344	13.1766	13.499	14.1599	14.3625	cluster_3
shyg4369	0	0	0	0	8.31239	8.17035	0	12.3396	6.95617	12.9702	13.399	14.3056	cluster_4
shyg4372	8.70889	6.98327	7.74888	4.45878	1.81003	7.19524	8.98194	9.23448	11.9094	13.4419	15.7488	12.0155	cluster_4
shyg4373	13.1431	13.3194	14.8512	13.1549	11.8577	11.6597	12.6684	12.4828	12.5192	12.5106	13.3075	11.5375	cluster_1
shyg4377	11.8011	11.049	9.80634	11.7776	14.8488	16.0365	16.8534	16.8433	16.6022	16.3403	15.404	15.5385	cluster_4
shyg4379	6.77604	9.53924	6.63619	4.29602	3.80948	6.33403	8.75517	8.23876	11.6708	7.85872	10.7791	11.1672	cluster_4
shyg4385	0	0	0	0	0	0	0	0	6.3477	9.33936	7.24855	9.40538	cluster_4
shyg4386	0	0	0	0	0	0	0	0	0	8.95217	8.30413	8.32396	cluster_4
shyg4392	0	12.8864	11.6907	12.2585	9.31146	11.6579	12.5393	12.8593	12.804	14.9369	13.9929	14.2815	cluster_4
shyg4394	16.7682	13.1293	11.4093	7.79165	0	0	0	0	0	0	0	0	cluster_1
shyg4399	9.68416	10.9323	10.6526	12.0354	12.1836	12.9127	12.5522	11.244	12.8272	12.9913	13.5292	13.0168	cluster_4
shyg4400	0	8.2668	10.2351	8.77246	11.9894	14.702	9.92584	14.0444	14.0482	14.7494	15.1881	15.8377	cluster_4
shyg4403	14.6112	16.4735	16.8814	17.0308	17.0473	16.3136	16.9258	16.7452	16.3023	15.878	16.5456	17.0366	cluster_2
shyg4405	9.27369	9.59694	10.206	10.8163	9.49575	9.2913	9.3145	9.49645	9.27715	9.5164	10.3863	10.6573	cluster_4
shyg4409	20.7337	19.2354	18.3355	17.5937	15.9407	15.6669	16.5778	16.5191	15.6073	15.2736	12.9868	13.96	cluster_1
shyg4421	8.74677	5.99696	6.42007	6.27995	6.57369	8.33366	9.27695	3.78982	9.26656	8.45257	13.212	13.6175	cluster_4
shyg4423	10.9277	15.6595	14.2924	14.5192	14.5298	14.4884	14.974	15.143	14.7511	14.8497	13.6071	16.7653	cluster_4
shyg4424	8.50032	12.1432	13.0303	12.5084	12.999	13.4913	13.9502	14.5394	15.0003	15.039	13.2966	13.9263	cluster_4
shyg4425	13.1246	15.1798	14.501	13.4526	12.3884	12.6744	11.5996	12.7836	12.0074	14.194	14.701	15.2991	cluster_3
shyg4431	12.5916	9.09203	9.09705	5.94385	4.32922	3.26259	8.44297	9.4841	7.89926	11.3713	10.0993	11.445	cluster_3
shyg4434	20.1221	19.1586	18.4747	18.0925	18.4513	18.5228	18.1042	18.4206	18.6124	19.3899	19.7933	19.7445	cluster_3
shyg4436	8.1212	12.0824	10.8863	9.60749	9.01129	8.23976	10.0922	9.31459	10.86	12.4873	13.7412	13.9178	cluster_4
shyg4437	6.78443	4.81289	6.42883	5.74407	5.31058	4.4739	7.53445	5.34173	7.65399	6.14754	6.17277	6.23528	cluster_3
shyg4439	15.0871	13.9211	13.5195	14.7539	15.3454	13.5762	13.5349	12.5987	12.8018	13.8927	14.0785	14.1799	cluster_1
shyg4441	6.08209	7.49326	8.12394	11.6328	10.6944	10.207	7.27408	8.25069	5.99651	7.1279	9.82	7.15681	cluster_2
shyg4442	14.8577	14.0147	14.352	13.8985	13.074	12.5288	12.8186	11.8761	10.6172	11.4087	9.79341	9.80856	cluster_1
shyg4449	14.5789	10.0355	9.42885	10.1685	7.79697	7.50047	9.35813	9.02763	7.15301	10.163	11.89	10.1124	cluster_3
shyg4453	17.9236	18.2763	13.7782	10.4151	8.42432	10.4422	10.7204	11.9447	10.7759	11.9944	12.3632	11.9401	cluster_3
shyg4459	0	13.9104	11.7203	8.4116	6.88298	6.81075	8.1596	11.8796	10.1656	0	7.25222	0	cluster_2
shyg4462	9.80736	12.6881	9.99552	9.31435	9.56065	9.70741	9.48856	0	0	0	11.6507	0	cluster_1
shyg4463	7.05125	12.2846	12.5959	10.547	8.48528	8.21575	9.89509	9.27967	11.5827	12.4033	11.3411	7.68631	cluster_2
shyg4466	14.0505	14.6794	15.8705	15.7129	14.5466	14.5656	12.8333	12.6179	12.5254	11.979	12.2092	10.9889	cluster_1
shyg4467	13.7572	12.9224	13.2318	13.5514	13.4606	12.2688	11.7799	11.4721	10.8901	11.2918	10.8443	11.4185	cluster_1
shyg4468	0	0	0	0	0	7.05041	9.41966	11.1899	7.46398	10.5991	9.3159	9.65019	cluster_4
shyg4469	8.66692	11.0715	10.6749	10.032	10.0505	8.71913	10.6136	12.0008	10.1169	10.4747	8.50333	9.59167	cluster_2
shyg4470	14.0578	13.7913	14.5595	13.9288	14.3576	13.5867	14.0796	13.7734	13.5424	13.4834	11.7614	11.2678	cluster_1
shyg4471	10.4899	10.9557	11.1439	12.2324	8.99378	9.97648	8.25829	8.05618	8.21674	0	9.32742	0	cluster_1
shyg4472	7.02321	9.74062	8.49174	11.4852	11.9518	12.0266	12.231	8.59958	11.0631	9.83649	9.93107	7.39997	cluster_2
shyg4473	9.50294	9.77538	11.3508	9.15746	5.95273	9.08179	11.9531	11.6059	10.0011	8.75162	10.9202	9.78622	cluster_3
shyg4475	0	10.637	9.14087	8.44914	11.9896	10.9481	11.1752	10.964	15.7101	13.5819	13.6496	14.2879	cluster_4
shyg4478	0	10.7819	2.36322	5.28656	6.34251	8.4686	8.09538	6.47694	10.9878	6.55227	12.3833	12.2792	cluster_4
shyg4479	0	6.12523	4.66129	4.48374	5.14534	6.08835	6.71832	7.72762	10.1034	11.7274	13.1977	11.1554	cluster_4
shyg4481	0	8.74983	0	9.06049	11.4721	12.8509	14.4029	14.5933	14.8879	15.0181	14.7957	15.3288	cluster_4
shyg4486	4.2218	5.44473	8.77207	5.19105	1.43491	0	0	0	0	2.97853	0	4.30361	cluster_1
shyg4491	0	5.21567	5.13586	5.76962	7.90629	9.19085	10.6873	8.69257	11.8765	10.0989	7.56915	0	cluster_2
shyg4498	0	0	0	6.67832	10.9102	10.678	12.3587	12.7912	13.1162	14.9435	0	15.5813	cluster_4
shyg4504	0	13.9968	11.1194	16.2951	9.87283	0	0	0	0	0	14.9799	0	cluster_1
shyg4505	11.3895	13.0262	12.0566	9.09998	8.42312	9.63564	9.58638	11.671	9.16082	9.29605	10.9447	8.99986	cluster_3
shyg4510	10.7175	12.3656	12.5078	9.25809	11.2949	11.3296	8.73834	8.70134	8.08978	8.99495	8.12505	8.8058	cluster_1
shyg4512	0	0	0	15.2768	17.3629	7.80104	0	0	0	0	0	0	cluster_2
shyg4531	14.4927	7.92288	6.38451	0	0	0	0	0	0	0	0	0	cluster_3
shyg4533	13.0159	14.436	13.3414	11.463	10.2622	8.69055	8.45018	10.0438	9.15946	10.063	12.8688	9.24519	cluster_1
shyg4539	11.9655	9.57735	10.5552	8.11096	8.02858	9.77208	9.94586	12.0636	11.5685	9.2385	13.057	12.3281	cluster_3
shyg4541	18.3132	17.7392	18.1451	18.4836	18.6897	18.7687	18.7377	18.7014	18.0047	16.6203	16.5116	16.9139	cluster_2
shyg4543	0	0	6.81185	5.12804	6.42702	4.98121	10.4996	9.99302	10.4337	10.9823	10.6901	10.2661	cluster_4
shyg4544	7.56163	9.36485	11.3991	2.9099	2.30269	2.30935	7.81325	10.2869	6.07759	8.96688	5.24323	5.23027	cluster_3
shyg4545	10.2644	11.8883	9.86057	12.1461	11.2083	8.09323	8.49901	8.53453	7.91886	10.0335	6.90256	8.36677	cluster_1
shyg4546	12.893	14.83	15.5996	14.7774	14.6076	14.6846	14.8782	14.8383	13.6535	13.3995	12.2043	12.3085	cluster_2
shyg4549	11.1835	14.0523	14.887	13.9091	13.2557	13.8861	14.3124	11.901	12.7313	11.3948	9.15708	10.7825	cluster_1
shyg4550	12.4165	12.7201	13.1349	15.0618	13.0675	14.2596	14.1052	14.8112	13.1929	10.8213	10.3879	9.46703	cluster_2
shyg4551	5.49114	5.58929	5.40746	11.0111	5.2579	5.63773	9.19462	4.48163	5.7472	0	0	0	cluster_1
shyg4552	20.083	18.947	17.7443	16.8604	16.3856	16.281	16.4843	16.5804	16.3476	17.205	0	0	cluster_1
shyg4558	10.6757	9.60025	10.6516	9.5096	6.70352	7.90828	6.4218	8.56824	7.63167	6.81542	7.87062	7.17097	cluster_1
shyg4561	13.0948	12.7678	13.6086	12.8159	11.4622	10.9027	11.0095	11.5372	10.879	12.4388	12.0338	10.3145	cluster_1
shyg4564	14.8491	11.642	11.2155	6.11801	0	6.40865	7.39959	10.1964	0	0	0	0	cluster_1
shyg4565	0	11.0767	12.347	8.63067	7.71052	9.09311	8.16178	5.56514	9.75986	10.4385	7.43055	0	cluster_2
shyg4571	6.74094	10.2799	11.6744	11.6463	10.9069	9.12875	10.008	9.70328	9.37708	8.56952	9.48096	8.84057	cluster_2
shyg4573	12.7687	12.5088	10.1301	11.9125	10.1077	11.3467	12.772	11.5354	12.8643	12.4	12.794	11.5557	cluster_3
shyg4577	6.6055	7.59089	0.852781	0.776686	5.43889	3.81487	5.15312	4.87997	5.69954	12.7033	13.4287	10.4492	cluster_4
shyg4578	0	0	0	0	0	0	0	0	9.07343	12.9528	15.6683	16.9586	cluster_4
shyg4580	16.4311	0	0	0	0	0	6.04584	10.441	8.98908	17.4355	0	0	cluster_3
shyg4582	17.3633	17.0992	17.5346	16.52	16.2537	16.6547	17.034	16.8636	16.0082	16.148	14.5969	16.2009	cluster_1
shyg4584	11.1254	10.323	10.8765	9.75303	7.48214	7.76534	9.55545	10.4565	8.5609	8.19888	6.96942	6.5849	cluster_1
shyg4585	13.7433	14.2266	11.5827	12.5406	11.9801	12.2601	11.1004	9.78994	8.37655	9.17274	5.91031	8.21714	cluster_1
shyg4586	0	0	0	13.4197	12.0504	14.3983	16.3191	0	16.5846	17.7313	17.4344	0	cluster_2
shyg4587	2.73681	3.44589	2.7312	0.859032	3.92848	4.57414	5.60313	4.75767	6.49973	4.01155	8.18166	6.45319	cluster_4
shyg4591	7.84223	11.0225	8.25041	7.05415	8.80525	10.1933	10.1397	9.91146	10.251	9.56528	7.41847	10.1257	cluster_2
shyg4592	9.3492	10.1531	10.1226	8.89544	8.25408	9.30286	10.1084	8.86151	6.90274	8.09671	7.32238	8.15196	cluster_1
shyg4593	9.60183	11.3015	11.6013	11.6497	12.5122	13.7626	13.5194	14.0431	12.7687	12.1259	8.37144	7.87995	cluster_2
shyg4595	11.2533	10.436	8.36081	10.9227	11.2021	12.3019	10.5741	11.1943	10.2158	8.82625	9.82719	8.80312	cluster_2
shyg4599	9.94766	11.7937	11.1667	8.44258	6.85942	8.1121	8.56544	8.6355	5.9935	5.90195	5.96264	5.55077	cluster_1
shyg4600	12.4003	13.3437	14.4076	11.6234	11.3305	12.0484	12.9615	12.8905	10.9293	11.5864	11.3696	10.5859	cluster_1
shyg4601	13.6574	14.2741	14.4118	13.4997	12.9662	13.5169	13.634	14.3341	12.7246	12.6071	10.8628	10.6412	cluster_1
shyg4602	5.60111	5.29087	4.99347	0.791224	1.07706	1.31608	3.17797	3.65219	5.22	7.37674	10.6509	11.6191	cluster_3
shyg4605	16.6044	11.1313	10.9034	10.1355	8.3393	6.3406	9.80911	10.4735	11.8717	12.0762	13.0637	12.9638	cluster_3
shyg4607	16.587	15.9208	13.3138	12.0098	12.5201	12.652	10.9604	12.9025	11.2104	11.678	10.6122	12.4931	cluster_1
shyg4608	11.941	10.0965	11.1524	10.0875	8.50383	6.32345	6.93035	8.98463	6.58982	5.74512	6.69861	0	cluster_1
shyg4617	0	0	0	10.237	0	11.7501	11.9023	11.1903	12.1797	17.7193	0	0	cluster_2
shyg4647	0	6.98573	10.2759	8.6582	7.17669	6.41776	8.31454	7.97808	11.2993	9.73715	6.28669	8.2965	cluster_2
shyg4670	16.2516	14.6455	8.97122	10.033	7.17645	8.28565	7.7211	0	7.54073	0	7.83732	0	cluster_1
shyg4681	8.42474	9.73501	9.35413	7.26868	6.12626	7.19937	5.29591	7.79595	5.83751	8.47264	9.01976	10.6593	cluster_3
shyg4686	15.6349	13.9593	0	7.16032	0	3.66404	4.63042	0	4.18915	0	7.78578	0	cluster_3
shyg4699	0	0	0	0	7.73838	12.0797	12.0674	13.28	13.9254	17.1527	15.9236	16.6845	cluster_4
shyg4700	0	7.45608	7.50784	7.11907	8.81713	9.86958	10.4553	10.2899	12.5916	13.4672	15.3023	14.512	cluster_4
shyg4706	0	0	0	14.615	15.4382	16.3401	0	17.6296	0	0	16.6283	17.5279	cluster_4
shyg4710	15.0311	17.2651	0	0	0	0	0	0	12.075	18.5618	16.2724	15.7333	cluster_3
shyg4713	4.93417	4.85003	4.61824	7.35174	8.00436	5.93751	4.2823	4.40228	7.37165	10.0372	13.9024	12.8125	cluster_4
shyg4714	0	7.68837	6.2935	9.03451	9.12226	8.79372	8.45928	10.8153	12.2734	12.9457	14.1468	13.1895	cluster_4
shyg4715	8.46695	9.4554	10.1672	12.1952	9.86489	8.51857	6.30149	6.98698	12.4903	11.684	12.6049	13.2356	cluster_4
shyg4716	0	0	0	0	7.97128	8.80811	0	13.0957	13.3933	14.3559	16.3119	17.0372	cluster_4
shyg4719	4.71947	4.54357	5.02104	5.19447	7.64438	9.43962	11.153	12.9066	13.1308	12.6198	13.834	13.2615	cluster_4
shyg4721	10.6788	10.4893	11.6384	14.85	14.2672	12.151	11.9406	9.96655	11.2539	11.9092	9.82712	9.52172	cluster_2
shyg4722	9.37552	7.83871	10.1706	14.25	8.38243	6.95128	6.89746	7.80448	10.4533	11.803	10.4867	12.4179	cluster_4
shyg4723	8.81741	7.98097	7.5348	5.01773	4.56697	6.19825	6.88334	7.96782	7.18058	7.04812	5.8435	7.26763	cluster_3
shyg4724	6.12049	6.9753	6.91078	5.34634	6.59278	6.43174	4.84422	4.27312	3.0474	6.97385	2.38045	3.40616	cluster_1
shyg4725	17.6525	14.1384	5.12652	9.49533	10.5143	0	0	0	0	10.8143	9.16142	0	cluster_3
shyg4727	16.403	16.1775	16.4679	16.5476	15.7957	14.8065	15.1499	15.248	15.2546	15.4692	15.7485	15.8681	cluster_1
shyg4729	16.4666	18.8949	13.9899	13.2025	0	0	0	13.757	0	0	0	0	cluster_1
shyg4739	18.3472	18.9367	18.0623	17.6603	17.9594	18.176	18.5814	18.6459	18.6187	17.9673	17.0116	16.9034	cluster_1
shyg4743	11.8743	9.48141	9.94084	5.0424	2.96601	5.3365	6.70799	6.2529	7.28479	10.1979	10.8187	10.8681	cluster_3
shyg4747	16.8827	12.353	6.99286	5.67005	3.58775	8.2426	8.60361	9.53152	10.3712	0	9.67686	0	cluster_1
shyg4750	15.4338	13.2533	12.3093	7.78336	6.91804	8.80817	9.75996	11.8215	8.84479	0	7.56746	0	cluster_1
shyg4754	0	12.167	0	8.01862	10.915	9.40907	10.5498	0	11.0156	12.9557	0	12.581	cluster_2
shyg4770	9.01921	9.25509	8.79145	9.67211	8.24977	9.31713	9.40872	6.00786	6.88781	6.61797	8.84329	7.43289	cluster_1
shyg4772	10.6433	13.5446	13.7991	10.6165	9.98847	10.1073	11.5055	11.2131	9.52077	9.82686	8.63958	8.42183	cluster_1
shyg4775	9.65649	12.8536	14.0984	14.2093	12.7139	12.5193	12.6982	12.6788	11.495	10.2982	9.43068	8.46306	cluster_2
shyg4777	13.2415	14.5066	14.3605	15.4812	14.7924	14.4617	13.8497	13.3424	13.1608	11.3996	11.0397	11.8145	cluster_1
shyg4781	8.13667	6.54376	7.25531	5.58119	9.35398	9.79179	9.48006	9.17071	9.58242	12.0028	14.8683	15.171	cluster_4
shyg4782	11.1036	12.4434	10.8934	13.3027	12.7511	12.5978	13.5782	13.505	13.089	13.7212	13.2688	14.2018	cluster_4
shyg4783	7.80023	2.4015	6.0344	6.25612	6.20702	4.46597	7.75141	6.9523	8.44589	8.59531	10.0702	8.55713	cluster_4
shyg4786	0	0	0	0	7.29988	7.0962	7.84929	10.6201	9.72201	10.72	12.2468	12.38	cluster_4
shyg4787	11.8952	11.2027	10.6367	10.0258	9.60541	8.77969	10.5717	11.7476	0	0	0	0	cluster_1
shyg4789	10.3602	12.2622	13.038	12.8295	12.553	13.8295	14.4128	15.3061	15.9467	17.0584	16.5374	16.0827	cluster_4
shyg4791	0	0	9.56097	11.8694	8.12067	0	8.00469	10.4341	7.57167	0	0	0	cluster_2
shyg4792	0	0	12.1902	0	12.3513	12.4466	11.7066	0	0	0	0	0	cluster_2
shyg4794	4.98147	6.20074	6.44371	7.78391	7.4115	7.6835	9.04295	9.03075	9.3836	11.6227	11.7164	12.5487	cluster_4
shyg4795	7.3433	8.86378	9.74104	8.31797	7.47266	8.19918	9.03514	10.3334	11.9467	10.8181	13.222	13.4757	cluster_4
shyg4796	0	11.2264	11.1824	12.4257	12.873	12.8513	13.1415	12.4938	13.2369	14.7552	11.5708	14.366	cluster_4
shyg4800	12.588	11.8594	10.9963	7.46745	7.57582	7.64155	8.10155	11.6833	11.0678	12.6766	12.6497	12.8754	cluster_3
shyg4801	6.7893	8.14435	8.82015	6.17966	8.90986	8.41373	7.47551	8.99472	8.73225	11.1706	9.8888	8.89767	cluster_4
shyg4802	10.7684	11.908	12.2427	12.2607	12.8269	13.0467	12.6536	12.92	11.5582	11.1974	10.8255	9.86617	cluster_2
shyg4804	0	7.15089	8.19485	6.74715	4.56098	7.85378	6.33036	8.26091	10.6406	9.39696	11.7761	12.2192	cluster_4
shyg4805	0	9.55433	5.99504	0	0	5.21919	0	0	8.87683	18.9593	13.3307	15.6948	cluster_4
shyg4814	0	9.90073	8.29173	8.78266	6.81564	3.88393	0	0	9.47488	13.067	13.6505	15.3357	cluster_4
shyg4815	0	17.0726	0	0	13.1596	10.5948	11.6422	0	12.0873	16.5921	0	16.6079	cluster_4
shyg4816	18.7929	9.65706	8.48276	6.60183	7.11454	5.84362	7.12247	8.24743	7.61596	10.4609	12.1064	12.6473	cluster_3
shyg4822	0	0	0	0	0	0	0	0	0	13.1917	13.1707	13.3665	cluster_4
shyg4824	14.4919	11.7001	11.0981	8.20225	0	3.60071	6.96092	9.00392	0	0	0	0	cluster_1
shyg4833	11.9687	12.3926	11.7843	10.4427	10.0446	10.1585	10.7635	11.155	10.5121	11.6533	11.8306	10.7081	cluster_3
shyg4834	7.96889	7.56317	6.89507	9.19516	8.28521	7.93191	7.43857	11.0559	7.94918	10.7991	11.0371	13.2689	cluster_4
shyg4835	9.95189	9.17646	8.03266	6.41926	6.03662	6.65623	7.60842	10.5511	9.0813	10.3877	11.1595	13.1947	cluster_3
shyg4836	0	8.32423	0	6.98939	9.2972	7.59945	11.1252	10.7132	9.47266	10.6069	14.5892	11.916	cluster_4
shyg4837	11.6785	6.15275	4.62897	2.80577	2.89784	1.79881	5.83579	6.79064	0	0	0	0	cluster_1
shyg4838	11.1711	8.94946	10.1538	9.37383	8.95501	10.1361	11.9384	12.4011	12.6284	13.465	14.1393	13.1638	cluster_4
shyg4840	18.2543	10.4152	9.2857	10.7663	8.6025	7.03019	9.26913	8.16966	9.79277	9.57093	0	0	cluster_1
shyg4845	0	8.64119	6.4481	6.69397	4.48093	6.78647	6.26356	11.3835	10.7587	11.8313	13.5287	13.2454	cluster_4
shyg4846	10.5631	8.46613	8.32687	7.06302	7.26781	8.22369	11.4805	11.3532	13.2878	14.0099	15.5896	15.1909	cluster_4
shyg4847	15.5623	12.1161	12.2125	11.2621	8.42599	9.54484	10.959	10.4747	9.03729	10.242	9.02248	8.71275	cluster_1
shyg4848	5.79424	5.98977	7.12657	6.18435	7.24836	8.25656	9.37076	10.8886	11.1563	11.9109	13.1562	12.517	cluster_4
shyg4849	11.6552	12.4655	12.0383	10.5307	9.23671	11.7738	12.9182	13.3351	11.2891	12.5026	11.3003	11.4376	cluster_3
shyg4853	18.3497	17.6635	17.553	16.995	17.2931	17.4038	17.5848	17.7736	18.1746	18.4135	18.7948	19.0901	cluster_3
shyg4854	8.81436	8.40623	7.40313	2.8715	3.71365	6.21242	8.46902	9.85433	7.29212	10.4574	11.5933	11.4611	cluster_3
shyg4855	10.8521	12.4155	13.1017	12.2864	11.5978	12.3669	12.063	12.3722	11.8293	11.7383	12.0362	10.3906	cluster_2
shyg4856	13.0104	14.4117	14.604	14.3043	13.8921	13.5252	13.7234	12.906	12.9271	12.7172	11.9247	11.8403	cluster_1
shyg4860	9.83349	9.85754	10.5158	9.655	8.28649	9.2248	10.7277	10.9475	9.77172	7.03212	5.82985	6.3981	cluster_1
shyg4861	12.7202	14.8282	14.904	14.2853	14.2515	14.1321	14.8098	14.1463	13.9296	13.5415	12.541	13.0576	cluster_2
shyg4864	19.3449	17.8692	15.3621	10.7945	13.7264	13.7953	15.7844	16.0295	15.1975	15.0813	15.7097	15.0959	cluster_3
shyg4867	10.2177	9.76979	10.4014	9.17572	7.94995	8.00873	9.75734	10.2923	11.6159	12.8805	13.78	14.1992	cluster_4
shyg4868	13.4067	14.9613	16.0476	14.909	14.1022	13.9213	13.5608	14.4544	9.44921	11.9435	9.95867	8.96693	cluster_1
shyg4869	15.6214	14.4675	14.8763	12.6445	11.1433	13.4819	13.9909	13.4369	12.7514	13.5325	0	0	cluster_1
shyg4870	17.2619	15.4653	13.7826	10.392	9.46917	12.0727	12.4691	12.942	14.3711	14.9566	16.7861	16.0034	cluster_3
shyg4871	12.0515	11.012	10.3959	10.9817	10.7519	9.97051	11.8745	10.8617	9.70973	9.10317	10.3895	9.35833	cluster_1
shyg4873	16.685	16.2979	17.0613	15.7861	15.6789	16.3144	17.1642	17.2579	14.4159	15.2121	15.4205	14.0977	cluster_1
shyg4874	13.4309	14.4241	14.8591	14.9829	14.0922	12.8146	13.2925	13.0584	11.9507	11.9377	11.1604	10.1821	cluster_1
shyg4877	10.6698	9.14203	10.1277	6.91136	5.61455	6.6094	6.84868	7.49255	7.15633	8.33578	9.11848	9.60663	cluster_3
shyg4879	7.14919	6.67566	6.91112	6.06998	7.26781	7.22116	6.71952	9.33065	8.65028	6.1954	6.79316	7.49632	cluster_2
shyg4880	8.22057	12.4853	12.0601	11.1283	9.27631	11.1125	10.5221	12.1363	10.3854	10.8298	9.82797	0	cluster_2
shyg4883	10.3603	10.2948	11.618	12.5668	12.6671	10.5442	10.3809	10.1307	9.93698	8.85487	8.95455	8.46856	cluster_1
shyg4885	14.0011	14.8216	0	0	0	6.77874	8.29153	0	0	0	0	0	cluster_1
shyg4887	11.2037	11.4107	11.5327	11.0795	10.9985	12.2684	10.6467	11.4834	10.8325	11.976	11.4163	11.4183	cluster_3
shyg4888	12.8946	12.8111	14.2719	14.0957	13.9934	14.1756	14.9918	14.8245	15.6192	15.6981	16.1657	14.5839	cluster_4
shyg4890	13.1476	10.2792	11.165	9.75882	5.90582	5.87316	8.09927	8.20871	6.3184	6.19572	4.5131	4.58038	cluster_1
shyg4891	16.9086	15.6844	16.6958	16.9796	16.1898	16.637	16.8914	17.037	16.3937	16.7852	17.3775	16.1675	cluster_4
shyg4892	12.7058	12.3591	12.3502	10.907	9.09127	8.86195	8.87249	9.25624	8.63865	9.503	8.31806	8.50888	cluster_1
shyg4893	15.5634	14.2983	14.4117	14.2753	13.8596	12.3577	11.8089	12.3197	10.1363	11.031	10.4912	9.37063	cluster_1
shyg4897	0	0	0	0	0	0	0	10.3203	0	17.8967	9.86455	0	cluster_4
shyg4910	14.458	8.79021	9.23761	4.59069	5.99157	6.78459	6.7855	8.70848	6.23118	5.81435	4.67648	5.66484	cluster_3
shyg4913	0	0	11.2937	6.37554	11.4201	0	12.3032	0	11.9753	0	15.3533	16.6112	cluster_4
shyg4923	13.6724	11.7519	0	0	0	0	7.2765	0	10.1531	16.0385	9.41293	0	cluster_3
shyg4934	8.70637	8.45718	9.31806	8.80193	6.45279	9.05611	7.00411	7.42784	6.31112	6.5288	8.5912	7.35467	cluster_1
shyg4936	8.9628	9.04192	7.77775	8.08889	7.24724	10.9136	11.3716	9.24853	12.9607	13.9865	16.7713	13.4552	cluster_4
shyg4937	14.3817	11.0795	0	0	0	0	11.8867	0	0	17.1781	12.5867	0	cluster_3
shyg4938	0	7.78714	0	0	0	0	0	8.06495	9.74243	10.9894	9.04137	9.90212	cluster_4
shyg4941	12.117	12.332	13.6704	13.4345	13.0398	11.6897	10.2191	10.8093	10.1596	8.27935	0	0	cluster_1
shyg4954	0	11.9154	12.5543	12.223	11.6931	12.0267	10.6086	12.5252	11.5918	17.7894	17.5204	15.7727	cluster_4
shyg4968	6.10624	7.58387	7.24202	9.93609	7.96349	7.36381	8.04304	7.52025	4.70498	1.07942	1.55803	1.18992	cluster_1
shyg4971	0	8.11265	12.4189	10.412	8.85364	11.4437	11.2986	12.3602	11.3134	12.5476	14.1652	13.584	cluster_4
shyg4973	0	0	0	0	0	6.12685	0	0	10.94	15.6014	15.0544	14.9553	cluster_4
shyg4974	13.2336	11.3234	0	11.4617	9.8943	11.6987	12.9272	12.8444	14.196	0	0	0	cluster_2
shyg4975	0	12.8598	0	10.9409	9.95812	11.7897	12.6013	12.3596	12.8995	13.2288	13.7559	0	cluster_2
shyg4976	6.79098	8.43004	6.8054	5.23527	5.32367	8.8534	10.1421	14.4171	10.7404	8.45546	9.52014	12.2417	cluster_4
shyg4989	5.32176	6.4544	5.66916	4.26398	8.55519	11.4315	11.6643	12.3288	12.2129	14.4675	16.8879	15.3614	cluster_4
shyg4990	14.0379	14.7696	13.9744	13.0824	13.4309	14.3469	15.6731	15.5882	14.8328	14.9767	14.191	14.8537	cluster_4
shyg4994	10.082	10.7671	13.0241	11.3493	9.01632	9.12683	8.46884	6.34479	7.22672	7.72337	3.56	5.39234	cluster_1
shyg5000	0	0	0	0	0	0	11.3285	13.4157	8.63483	12.1688	13.0497	12.2751	cluster_4
shyg5008	0	0	0	0	0	0	0	0	9.62275	11.7491	13.2974	11.4045	cluster_4
shyg5021	0	9.98323	8.21928	10.3701	10.5819	10.4758	10.697	10.8058	10.8686	10.9743	10.9439	11.3819	cluster_4
shyg5034	12.7572	12.6257	6.47435	5.37762	5.37953	5.04105	5.96174	5.98937	0	0	0	0	cluster_1
shyg5050	0	0	0	0	0	0	6.03836	0	6.01648	9.73545	11.2268	14.1344	cluster_4
shyg5055	14.781	13.6759	14.6659	11.8328	9.69325	11.8556	13.4813	12.8924	13.1013	13.5922	14.2009	15.8265	cluster_3
shyg5063	5.66767	5.37409	6.79735	9.42548	11.9274	13.184	13.4279	14.6697	14.434	14.5499	14.5913	12.6561	cluster_4
shyg5070	0	8.14204	10.8412	0	0	0	0	0	0	0	0	0	cluster_1
shyg5071	0	17.2066	17.0301	14.5138	14.3628	15.0817	16.6308	16.9167	15.257	16.6726	11.1298	0	cluster_2
shyg5073	0	0	0	0	0	0	10.7797	0	9.94886	14.8296	14.0546	14.1868	cluster_4
shyg5077	0	18.9554	18.1313	16.3953	16.6103	16.4967	17.7482	17.712	0	17.974	17.5137	0	cluster_2
shyg5079	13.2876	14.1146	14.4635	14.4633	12.8588	14.5548	14.2703	14.1277	13.9281	14.1568	12.8974	10.346	cluster_2
shyg5081	0	14.734	14.39	8.63018	8.56813	11.2581	12.161	11.9723	9.3761	0	0	0	cluster_2
shyg5086	0	6.49636	0	6.40059	5.92231	8.19036	10.0757	11.4101	11.3316	12.4974	13.815	14.9207	cluster_4
shyg5088	0	0	9.7557	8.64525	6.95396	5.87151	8.2663	7.15098	0	0	0	6.89577	cluster_2
shyg5100	10.5154	12.1058	14.3299	13.5058	13.7899	14.1212	13.5399	13.6308	15.0161	13.6506	14.937	14.3767	cluster_4
shyg5126	0	8.64861	8.03104	10.1322	7.91674	4.0357	7.20714	8.46576	5.7256	0	0	11.7862	cluster_2
shyg5129	0	14.4898	0	0	12.4523	12.3287	12.9258	13.5173	12.3629	14.9077	15.2046	15.1277	cluster_4
shyg5158	0	0	0	0	0	11.5513	0	0	14.6639	16.3027	14.8778	17.35	cluster_4
shyg5159	11.7228	11.3113	11.1778	11.2762	11.0027	11.135	10.9369	11.0983	15.27	13.7769	14.4117	13.8877	cluster_4
shyg5167	9.28513	9.4293	10.073	8.60372	7.73093	8.16317	7.46391	7.57138	5.75765	4.88138	4.78671	4.42854	cluster_1
shyg5168	13.0528	10.8578	10.6814	6.30761	4.81795	5.18948	5.94985	6.04364	1.24945	5.30984	3.56655	5.78146	cluster_1
shyg5169	16.7287	12.0358	9.5927	10.4465	7.51072	6.24498	0	0	0	17.5097	5.57264	0	cluster_1
shyg5172	12.2537	12.0537	11.6351	11.113	11.0087	10.9723	11.404	12.0367	10.8528	10.9742	10.109	10.9821	cluster_1
shyg5173	0	11.1333	10.473	6.74672	7.44977	9.9163	10.484	10.074	8.20474	9.41344	5.28133	11.5618	cluster_2
shyg5176	14.5436	11.4277	9.12561	10.5717	8.14861	6.56513	7.29436	10.2701	7.32569	10.5769	11.8617	12.0786	cluster_3
shyg5178	14.7191	11.8926	12.4356	10.2189	11.5444	11.08	10.2219	0	10.2365	9.19745	9.96114	9.86793	cluster_1
shyg5181	8.61696	9.24688	10.4481	12.408	15.3605	17.2342	17.9058	18.1292	18.0792	18.2596	18.1176	17.9807	cluster_4
shyg5182	6.19924	6.73105	7.18099	6.92404	9.61593	11.5157	13.3387	13.768	13.7449	13.2972	12.9088	13.5213	cluster_4
shyg5184	0	0	0	0	0	0	8.01749	10.0516	7.83073	10.5604	0	9.44008	cluster_4
shyg5190	5.18332	5.51644	5.82347	4.53214	8.4456	11.0662	9.5314	11.7814	5.86859	5.41589	3.63652	0	cluster_2
shyg5191	0	7.69755	7.2706	4.36769	5.94958	6.94919	7.70324	10.0178	7.11843	0	0	0	cluster_2
shyg5195	14.6782	7.97294	8.63395	0	0	0	0	0	0	0	0	0	cluster_1
shyg5196	0	9.79368	9.47997	10.6546	8.21842	8.37255	10.4938	10.1518	10.8851	7.58062	10.7723	9.7081	cluster_2
shyg5198	12.1609	13.5486	15.2387	12.7554	10.8195	10.4467	12.735	13.6161	9.23784	10.8248	12.0897	11.1323	cluster_1
shyg5202	14.0529	14.5238	15.5362	14.9952	14.223	14.304	14.5522	14.1621	13.8354	13.6479	14.4181	14.7175	cluster_1
shyg5204	0	0	0	0	10.4284	9.61317	0	0	0	0	0	0	cluster_2
shyg5207	10.1047	10.2123	9.1709	9.12416	8.76306	8.48034	10.0244	11.9167	9.81416	12.6522	10.6249	11.6951	cluster_4
shyg5208	15.3598	0	0	8.21157	7.20659	7.95309	0	11.986	0	0	0	0	cluster_1
shyg5209	14.8561	12.7892	11.1822	7.62204	6.8019	8.07018	10.9346	12.3575	12.9	14.619	16.9763	16.1606	cluster_3
shyg5210	6.41037	7.7757	8.42581	8.55799	10.3853	11.5323	10.4492	10.9361	10.2758	9.0737	9.94896	9.87921	cluster_2
shyg5214	9.36537	9.60137	9.42454	7.94675	7.48246	4.78161	7.79382	8.19591	6.00983	6.60443	5.11912	4.36396	cluster_1
shyg5215	0	7.65713	6.39093	0	0	0	0	0	0	0	7.05205	0	cluster_3
shyg5223	8.58841	11.3636	10.269	10.6791	12.2248	13.0767	14.2971	13.3025	14.1766	14.7113	14.1599	12.9694	cluster_4
shyg5226	0	0	0	0	0	0	0	0	4.83219	0	10.4095	11.4328	cluster_4
shyg5227	5.67569	6.74568	6.68848	4.20318	3.05002	4.58654	6.90112	7.41469	7.74582	11.2353	10.9036	11.8794	cluster_4
shyg5228	11.2846	13.9885	13.5498	11.0384	11.5971	10.8162	10.8504	11.5813	8.3682	8.95173	7.87283	7.2234	cluster_1
shyg5231	19.461	19.2676	20.0632	20.4703	20.8563	21.6282	21.904	22.3807	21.9847	22.4454	22.7598	22.3664	cluster_4
shyg5233	0	0	0	8.53197	0	0	10.0212	0	0	13.3865	15.61	14.7136	cluster_4
shyg5235	10.33	10.8101	11.4993	10.5876	9.10971	9.95521	10.4193	10.3863	9.91731	8.08825	10.4652	9.9855	cluster_1
shyg5236	2.82391	9.28974	7.19043	5.13	6.07435	6.23324	6.81263	6.30941	7.73954	8.84639	7.99514	6.28753	cluster_4
shyg5237	0	9.80071	8.78971	2.68631	2.66105	0.961126	5.56645	6.75119	5.20566	0	0	0	cluster_1
shyg5239	0	0	7.60029	7.53716	8.35333	9.87253	6.76845	7.44701	7.28407	9.39757	10.9036	7.70657	cluster_4
shyg5240	9.75794	8.55563	8.78731	6.86585	10.0757	12.9537	12.1171	12.4494	10.1997	8.9785	6.06051	7.80191	cluster_2
shyg5242	0	0	0	0	0	7.75262	7.31968	10.7821	0	0	5.3879	0	cluster_2
shyg5254	0	0	0	0	0	11.222	8.125	11.7812	13.9123	0	14.7011	11.4133	cluster_4
shyg5277	0	0	0	0	0	0	0	0	6.36031	0	11.2502	11.3119	cluster_4
shyg5285	0	0	0	0	0	0	8.00117	7.23687	9.90849	11.3018	9.89786	10.5943	cluster_4
shyg5287	10.043	9.58357	7.37104	6.65742	6.98093	8.89137	9.84808	9.91169	11.5286	12.2591	17.1133	15.6034	cluster_4
shyg5290	0	0	0	0	0	9.41889	10.8505	12.1736	9.66074	0	0	0	cluster_2
shyg5292	0	0	12.5345	11.5676	0	0	8.32555	9.58717	10.3073	10.3962	11.7823	9.91573	cluster_4
shyg5293	7.8173	7.52573	7.5742	5.41009	7.9772	8.78511	11.0072	13.1549	16.6872	12.1409	16.0906	14.6966	cluster_4
shyg5294	0	0	0	0	0	0	10.091	12.6797	13.659	16.2335	10.7381	9.68457	cluster_4
shyg5295	0	0	0	0	0	0	0	0	12.0144	17.938	14.9739	16.5271	cluster_4
shyg5296	0	18.7414	0	18.0593	18.2312	18.1563	18.371	18.105	17.8799	18.0292	16.203	17.5139	cluster_4
shyg5301	7.4272	5.96839	5.1901	4.31684	8.16121	9.88102	10.2671	11.0724	10.1767	11.1433	13.9609	9.96366	cluster_4
shyg5302	0	0	0	0	6.30912	8.29364	11.9033	14.7235	14.1678	14.8486	15.4005	16.1127	cluster_4
shyg5304	0	0	0	0	0	0	11.248	11.4481	12.7568	12.8727	13.0701	13.6697	cluster_4
shyg5307	0	0	0	5.78011	6.31249	5.00476	8.05301	10.5255	8.0765	8.66686	8.63882	9.67409	cluster_4
shyg5308	0	0	0	5.35112	6.91406	4.00864	8.54408	13.8589	12.3059	13.6801	10.0386	8.12386	cluster_4
shyg5309	0	0	0	7.51088	6.65324	6.43701	7.78569	12.2658	13.3012	12.7791	13.89	13.5449	cluster_4
shyg5310	0	0	0	0	0	10.1275	10.192	11.4867	11.6127	11.7232	12.4134	11.9217	cluster_4
shyg5312	0	0	0	0	0	0	0	11.4225	0	20.2789	11.4902	11.6069	cluster_4
shyg5336	0	0	0	16.7119	16.5777	15.3965	15.8179	16.5242	16.8992	17.0557	18.0048	17.7685	cluster_4
shyg5337	0	0	0	13.7129	16.1856	16.8048	16.9206	16.7138	14.8521	15.6991	11.4539	13.5274	cluster_4
shyg5338	13.5971	0	0	16.2966	18.4419	18.5167	18.2126	18.4985	17.864	17.5075	17.7845	18.0676	cluster_4
shyg5339	0	0	0	12.6065	15.0017	15.8202	16.675	16.4582	13.4365	12.1722	11.4109	9.56607	cluster_2
shyg5340	0	0	0	16.7788	17.9368	18.1943	18.1704	17.9705	16.7492	16.0406	13.4585	0	cluster_2
shyg5341	0	0	0	9.32598	6.7829	0	0	0	0	0	11.5995	0	cluster_2
shyg5342	0	0	0	11.2714	14.5004	15.9124	0	0	0	0	0	0	cluster_2
shyg5346	0	0	0	8.95739	7.26342	6.3903	8.29877	8.6588	7.21948	10.4457	12.0636	12.9158	cluster_4
shyg5347	10.1207	6.73208	8.91862	10.5522	12.1995	11.9314	13.7785	13.6201	15.3071	14.9105	14.5082	14.2842	cluster_4
shyg5348	8.36239	7.44091	9.25132	11.5413	12.1324	11.7818	12.5507	12.7234	13.1864	11.8777	12.4097	12.0406	cluster_4
shyg5349	16.5296	12.9619	14.6856	12.303	10.2126	13.2173	13.6502	16.8723	14.8659	0	14.8613	16.9658	cluster_3
shyg5356	0	5.10709	3.40281	5.84413	6.49349	7.58704	9.75991	9.80445	9.44066	12.3416	12.0862	13.0802	cluster_4
shyg5368	10.319	9.42208	10.6351	7.41426	7.16599	4.13225	7.79466	7.82916	4.36436	1.73064	1.43011	1.8526	cluster_1
shyg5370	9.69258	10.3155	10.838	10.8604	13.1224	14.1399	14.1303	14.8884	15.0397	15.1197	16.7189	16.2519	cluster_4
shyg5372	8.58189	9.13437	8.58123	9.91728	6.88037	6.76947	7.1078	7.35299	5.04234	8.25533	5.35352	8.80321	cluster_1
shyg5373	8.00914	8.6551	9.82729	9.36064	10.0644	10.6381	11.4235	12.394	11.7375	11.7145	11.9835	11.483	cluster_4
shyg5374	9.47295	9.39064	8.73398	8.67576	10.1884	10.9209	8.12374	8.5604	9.64604	8.99925	11.1113	10.5913	cluster_4
shyg5377	14.8475	13.7205	12.2768	8.05753	7.95819	6.97562	7.08771	9.55331	6.38228	0	13.7983	9.25629	cluster_3
shyg5379	15.0455	14.0703	11.3166	8.39565	6.40648	10.0554	9.5496	10.9044	9.94397	10.7085	7.21083	13.9563	cluster_3
shyg5381	0	0	0	0	7.88767	14.0044	16.6847	16.5074	18.2659	17.2611	18.1581	19.213	cluster_4
shyg5382	0	7.1595	8.17363	7.39289	10.0637	9.35196	11.6729	12.5938	10.5334	10.8852	10.6964	13.4184	cluster_4
shyg5384	0	0	13.2464	6.88373	7.4477	10.2305	0	0	12.6281	16.2289	17.1905	17.1258	cluster_4
shyg5385	8.67016	8.25256	8.74271	8.73733	8.60624	9.89241	10.5692	7.4731	6.86807	5.24847	4.51357	5.46249	cluster_1
shyg5386	0	10.6612	6.27274	5.99389	7.2317	7.69069	9.04979	8.97063	7.12739	8.69972	7.72295	11.6468	cluster_4
shyg5390	0	0	0	9.41337	9.28714	0	0	0	0	0	0	0	cluster_2
shyg5392	15.5589	12.0754	6.47226	10.104	0	7.26276	0	0	0	13.9632	0	0	cluster_1
shyg5397	0	11.0095	11.1276	11.6913	10.3373	12.1985	12.486	13.6497	12.6654	0	14.1519	0	cluster_2
shyg5399	0	0	0	8.57194	0	6.59838	9.85716	12.4102	0	13.1527	13.6618	14.1706	cluster_4
shyg5400	17.1376	11.634	9.69807	6.75649	10.4273	7.7297	11.1851	12.1948	12.3764	13.3026	14.1648	14.2926	cluster_3
shyg5407	16.9671	14.8713	9.94692	5.14627	0	6.43952	10.1764	10.6939	7.49075	0	9.22072	10.7802	cluster_3
shyg5408	13.9446	8.27153	6.4035	0	8.47475	6.80949	6.27434	9.37986	5.583	0	0	0	cluster_1
shyg5409	9.23061	10.4799	11.4674	8.93785	7.09209	7.46889	7.12153	10.0411	7.67096	8.75141	7.3532	8.29812	cluster_1
shyg5410	11.5001	14.3242	13.8525	10.6421	4.64068	9.60189	13.0159	12.1651	10.153	11.5821	13.2361	10.1921	cluster_3
shyg5413	17.5117	9.49614	8.57646	9.65316	7.08195	5.01105	0	10.2054	5.47224	14.1537	9.65159	8.97359	cluster_3
shyg5416	16.7267	15.8737	15.8179	15.7179	15.5071	15.0197	14.8009	15.2466	14.2924	13.5078	12.0819	13.3265	cluster_1
shyg5418	12.8118	13.895	13.219	14.0695	13.827	14.3473	14.5095	14.7175	14.3068	13.6099	12.9058	10.9481	cluster_2
shyg5423	9.14891	6.56306	7.17577	6.81405	6.31834	6.81667	9.49878	10.1234	9.44451	10.5479	12.1692	13.1671	cluster_4
shyg5425	9.15724	13.3438	13.3555	14.2966	14.2505	14.796	14.5963	15.4211	15.9636	16.1321	16.4637	16.6764	cluster_4
shyg5428	12.8801	0	0	0	0	0	0	0	0	16.7459	6.91297	0	cluster_3
shyg5433	0	5.45699	4.66593	3.50469	7.06331	8.155	9.98433	10.969	11.5313	12.2437	12.3858	11.2356	cluster_4
shyg5434	10.665	10.1601	11.0161	11.7392	11.9576	12.4684	12.9075	11.4792	12.0792	10.7237	10.9153	8.62173	cluster_2
shyg5435	13.2173	10.4147	2.6301	3.95374	5.36699	5.5486	10.2342	11.8498	9.40658	9.1909	8.26774	11.4107	cluster_3
shyg5437	10.3254	11.9339	11.7062	9.89065	10.1147	4.80901	8.13144	5.50594	5.35435	5.69117	5.48922	10.1692	cluster_1
shyg5438	11.1077	11.0927	12.6357	10.174	10.65	11.6103	10.3016	10.7099	11.0704	11.4954	10.6529	12.3196	cluster_3
shyg5443	13.1565	13.6141	14.237	13.4604	12.4505	12.5137	13.1517	12.619	11.5454	9.64363	8.90784	9.24861	cluster_1
shyg5468	11.8623	12.6649	13.4965	13.6284	12.6433	12.4027	12.0173	12.0888	11.3887	10.2059	10.1247	9.54911	cluster_1
shyg5469	7.23306	5.4599	1.23014	3.89126	6.38051	14.2358	14.2593	13.6598	13.2978	12.8172	11.2159	10.5452	cluster_4
shyg5472	13.1629	14.352	14.9368	15.8628	14.7897	15.6997	16.2921	16.4235	17.5396	17.7438	18.4233	18.4355	cluster_4
shyg5473	11.7886	13.7861	12.9748	13.0519	12.0152	11.0528	13.1371	12.5411	13.3642	12.5997	14.4066	12.3685	cluster_4
shyg5474	10.69	10.2857	8.08675	12.0343	12.2625	10.1936	9.47562	10.4523	11.9893	12.6606	13.4985	13.6265	cluster_4
shyg5475	13.4565	10.9894	11.6893	9.90865	7.60349	9.79858	7.51891	12.4729	12.0091	14.3457	11.3089	12.5125	cluster_3
shyg5477	0	8.44244	5.42372	5.43948	6.15635	7.79022	12.6799	10.0883	12.815	14.1947	13.9702	12.46	cluster_4
shyg5480	0	0	0	0	0	0	7.3701	11.7816	0	0	0	0	cluster_2
shyg5481	0	0	0	0	6.21884	0	7.08034	7.5484	10.6993	9.16162	8.07843	0	cluster_4
shyg5482	18.5761	6.86598	0	0	0	0	6.68942	10.3759	7.96105	12.3973	11.113	0	cluster_3
shyg5483	0	7.78747	5.44469	6.57613	9.31999	8.5622	9.35224	12.0038	14.7539	13.0537	15.5254	14.306	cluster_4
shyg5484	8.98076	7.89762	0	6.35211	7.6335	4.50831	0	14.0858	7.45216	9.02031	10.3252	0	cluster_3
shyg5485	0	10.516	9.5118	6.3319	6.97623	6.19389	9.8679	10.1752	10.7713	12.1385	11.8593	10.6139	cluster_4
shyg5487	0	0	0	0	0	6.95853	0	0	0	18.341	0	0	cluster_4
shyg5488	16.0098	10.8174	8.13375	10.2331	8.49871	7.25498	7.82944	9.36661	7.01394	10.3018	10.2492	8.70375	cluster_3
shyg5489	6.59958	8.6853	7.90722	3.11024	7.06762	7.01769	9.7009	9.55066	8.76818	11.6201	12.5233	12.3427	cluster_4
shyg5491	0	6.70725	4.36774	0	0	3.76959	4.5061	6.9583	5.55031	6.72107	7.35131	9.07653	cluster_4
shyg5493	0	0	0	0	0	0	0	11.1363	0	15.7391	13.8643	13.768	cluster_4
shyg5497	15.3165	14.5234	13.1973	10.3507	9.99272	12.3913	13.4344	13.9975	12.8518	14.8623	14.9696	15.6168	cluster_3
shyg5498	7.39373	9.54086	9.57541	7.58752	6.50512	6.02719	7.44198	7.05774	7.45002	8.10482	11.4571	9.45134	cluster_3
shyg5501	14.2773	9.27478	10.2133	8.74352	7.11913	0	0	6.97933	0	0	0	0	cluster_1
shyg5503	13.489	11.7036	13.1028	0	6.82898	8.26571	9.80752	11.2918	9.13629	11.9862	12.0269	11.6048	cluster_3
shyg5508	0	0	0	0	0	0	0	10.088	0	9.25621	6.77502	10.7467	cluster_4
shyg5512	16.0331	9.19749	8.4532	0	7.96749	7.24388	9.29854	11.2176	11.9733	12.1517	12.7528	13.4232	cluster_3
shyg5513	10.6732	13.3037	14.4115	15.3171	15.2255	15.5836	15.9205	16.4328	17.2339	15.6235	12.2205	11.2994	cluster_2
shyg5515	0	0	0	6.21798	12.291	0	14.4275	14.7401	13.4886	14.9538	0	14.6833	cluster_4
shyg5518	16.5098	15.5731	15.473	13.0037	11.9488	11.943	12.0399	13.8401	12.4612	0	7.048	0	cluster_1
shyg5528	0	0	6.60054	5.43687	7.68598	8.10493	8.31777	11.1679	8.18081	0	7.23146	11.8046	cluster_2
shyg5532	18.7452	16.0084	16.9838	16.4359	16.5668	17.1724	17.0181	16.7177	16.2621	16.5483	16.9576	16.5857	cluster_3
shyg5535	0	15.9394	15.1514	12.7583	14.2768	12.5529	15.3474	12.3007	12.2582	14.8293	14.1666	12.5877	cluster_2
shyg5540	12.482	6.30686	5.78683	3.53811	2.85478	0	10.1569	7.49381	3.91512	0	0	0	cluster_1
shyg5542	6.63634	11.2566	8.7354	3.22096	8.9012	10.2774	4.64541	3.70937	3.39973	7.0038	8.21297	5.22402	cluster_1
shyg5544	20.693	19.849	18.3363	17.0814	14.8414	14.4747	13.3429	12.736	10.6317	12.11	10.441	15.782	cluster_1
shyg5545	14.2417	13.3722	14.4411	14.5898	13.4104	13.3798	13.5716	13.7371	12.0253	9.71827	8.36917	8.11631	cluster_1
shyg5546	13.9071	10.679	11.2248	10.5131	9.48923	10.4014	11.7376	12.2241	12.2487	11.1499	13.5132	11.9969	cluster_3
shyg5547	17.2229	15.022	10.0263	9.73211	6.49143	7.8487	10.9505	11.4716	9.31584	12.7866	8.858	14.9	cluster_3
shyg5549	0	0	0	0	5.78541	5.36995	6.0698	8.00433	7.41869	10.7823	11.9307	12.3027	cluster_4
shyg5550	0	6.20751	5.358	6.20021	7.19541	6.70343	8.31173	7.96647	9.0494	9.85534	11.5306	11.8508	cluster_4
shyg5552	8.42036	7.63289	6.14185	4.72605	5.75968	5.40343	6.42371	9.57134	10.2032	8.94436	6.29893	0	cluster_2
shyg5558	7.90258	7.83828	5.70444	4.79727	9.17525	9.80769	11.2961	13.7667	13.682	13.6759	11.6297	10.7191	cluster_4
shyg5562	11.5934	10.6016	13.6982	13.2463	13.839	12.3846	13.876	13.9303	14.0143	14.7595	15.0707	14.9504	cluster_4
shyg5572	14.6024	10.6826	8.30863	0	0	6.42849	7.09609	8.05584	0	0	0	0	cluster_1
shyg5580	16.877	18.0455	0	6.95313	6.44596	6.878	0	0	0	14.4926	0	0	cluster_3
shyg5587	12.8943	13.79	15.2586	15.3238	14.7593	14.6661	14.806	14.5398	13.9779	13.9365	12.0691	12.4745	cluster_2
shyg5592	9.45708	6.55399	5.792	4.09286	2.83861	6.11993	6.892	7.35373	7.28479	10.4456	11.5005	11.262	cluster_3
shyg5594	0	7.24318	6.34342	6.20096	3.74208	6.38293	5.70045	9.90749	9.97915	10.7514	11.9521	8.28388	cluster_4
shyg5595	13.5024	15.589	13.8108	12.6373	13.9115	14.6922	15.1614	14.9686	13.7584	13.367	10.9258	10.9845	cluster_2
shyg5597	18.0992	17.3818	17.5972	16.5045	15.0925	15.845	16.2839	15.7057	15.6533	15.5986	14.6575	13.9509	cluster_1
shyg5598	0	13.7578	15.002	12.4491	11.1872	11.5591	12.1415	11.1885	10.3417	11.2413	10.8725	0	cluster_2
shyg5601	10.767	9.3775	10.9412	11.9066	12.0409	11.1178	10.7613	10.3876	10.983	9.64343	10.3184	8.31696	cluster_2
shyg5602	10.7427	13.8883	15.5049	14.9648	14.1922	13.207	12.7185	11.4941	8.32429	0	9.37496	0	cluster_1
shyg5606	9.21298	7.02937	10.0242	11.6552	13.9293	15.0236	15.5184	15.9603	16.4945	16.46	17.8089	17.5395	cluster_4
shyg5617	0	0	5.49467	0.896797	5.87454	7.06637	5.85311	8.04328	5.33322	5.53301	8.59646	7.27652	cluster_4
shyg5629	14.8104	17.0924	16.2487	15.741	16.1639	16.3166	17.5526	16.8744	16.1535	15.344	13.3807	13.4104	cluster_2
shyg5632	6.65532	4.95167	8.64878	9.10059	11.8602	9.38103	10.4611	7.92241	7.71601	8.35444	8.82338	7.36839	cluster_2
shyg5633	6.70672	9.19294	8.38319	7.01353	7.30023	8.62747	8.72522	7.87428	6.9584	10.251	9.71987	9.53441	cluster_4
shyg5634	0	0	0	6.63105	6.0742	10.5479	11.0271	11.9755	12.1671	0	14.1881	0	cluster_2
shyg5637	17.3773	18.3863	0	0	0	0	0	0	0	0	0	0	cluster_3
shyg5640	0	8.34719	5.27035	0	5.68208	7.44629	7.28353	8.94811	8.58423	9.18916	10.1853	6.91903	cluster_4
shyg5643	13.9751	14.696	16.1377	16.6514	15.7732	14.2301	12.0077	11.3189	10.5239	9.73122	8.75118	9.5375	cluster_1
shyg5644	9.83548	7.46627	8.44432	5.45119	3.47214	4.38306	4.50604	5.04396	0	4.00957	0	0	cluster_1
shyg5647	17.3387	17.5487	17.1549	17.4688	17.2271	17.3157	17.5793	17.6024	17.3369	16.724	15.6494	15.8699	cluster_1
shyg5661	0	0	0	0	6.31301	9.82278	10.1304	12.4509	9.79731	0	11.4329	0	cluster_2
shyg5669	18.8421	0	0	9.9792	0	0	0	9.30499	0	0	0	0	cluster_3
shyg5671	20.2271	10.1179	7.16625	7.42203	7.29463	7.0392	11.0641	12.0332	9.22076	11.7703	9.49705	7.94418	cluster_3
shyg5673	16.5756	10.0231	8.58497	10.194	7.93607	7.01002	0	0	0	0	7.03134	0	cluster_1
shyg5678	0	4.36548	0	7.87684	8.75082	8.25747	6.66283	8.65195	7.03188	8.30317	7.89842	0	cluster_2
shyg5682	0	12.2795	10.2258	7.47262	7.13332	0	0	0	0	0	0	0	cluster_1
shyg5687	14.2622	15.3587	16.6583	17.035	16.9588	16.8087	15.7995	15.1213	12.4994	12.7333	13.4044	12.6024	cluster_1
shyg5688	14.7388	0	0	11.6089	12.1727	0	0	0	0	0	0	0	cluster_1
shyg5690	14.7624	12.693	11.7658	11.8989	11.3735	11.4356	10.4362	10.257	12.114	12.5354	13.8148	12.8285	cluster_3
shyg5692	9.1381	12.2712	11.3964	6.2076	9.99808	5.42083	12.4961	5.80274	0	0	0	12.6397	cluster_1
shyg5693	5.27982	7.60487	5.57087	5.66133	4.92454	3.88404	4.74541	4.09764	4.30877	3.09643	4.4367	4.40625	cluster_1
shyg5705	16.6038	16.3906	7.83359	5.85254	7.03218	11.332	13.2238	12.8788	12.013	13.1058	14.4206	14.2742	cluster_3
shyg5707	14.6394	7.92967	7.08946	0	7.84781	7.40093	10.021	10.6759	7.1582	10.7684	7.93059	0	cluster_3
shyg5711	12.3824	12.7869	12.9072	12.8503	11.3715	11.2128	10.8314	9.61642	9.44609	7.46288	7.26148	6.61442	cluster_1
shyg5730	15.4015	9.30608	9.71244	8.67215	7.04643	6.35726	9.64588	7.9817	0	8.98422	8.88563	8.02276	cluster_3
shyg5732	5.06411	7.55736	9.3896	8.38861	10.3891	8.20017	8.99925	10.284	9.14058	8.90719	10.3282	12.3288	cluster_4
shyg5734	0	11.0708	10.5967	11.1474	11.7332	8.97359	0	0	0	0	0	0	cluster_1
shyg5737	14.6392	12.1692	11.6823	12.9018	9.2656	9.29283	12.2085	9.91303	8.38501	9.27846	9.30929	8.46003	cluster_1
shyg5744	8.65684	10.5001	10.0994	9.96626	10.1461	10.3292	10.7954	12.6068	11.914	10.7088	11.5356	10.8277	cluster_4
shyg5748	15.1981	14.0018	12.4018	10.838	9.91162	9.88187	9.71753	12.1516	11.586	11.7086	13.2241	13.7006	cluster_3
shyg5750	16.0586	7.60247	6.1272	7.71227	7.07666	8.05644	9.23616	10.316	10.3887	10.3546	10.7806	8.03404	cluster_3
shyg5751	11.7875	14.9452	16.3048	14.5046	13.5706	11.9348	11.5006	12.0558	10.5286	8.53072	9.45929	9.79794	cluster_1
shyg5753	0	6.81112	0	0	0	0	6.47026	9.28951	9.01103	9.67959	11.163	8.28664	cluster_4
shyg5763	9.82211	7.6807	7.84305	5.4767	3.96164	6.56812	6.24794	6.66149	6.52757	11.506	12.4807	11.6798	cluster_3
shyg5768	14.5694	14.685	15.3153	15.7458	15.8925	15.3489	15.0129	14.7175	13.3824	13.5428	10.3341	13.2691	cluster_1
shyg5770	8.70953	7.80821	8.54356	8.90625	11.5209	12.7074	11.9946	13.7741	14.7543	16.3966	17.0635	16.3019	cluster_4
shyg5780	0	5.9169	10.1913	9.14234	7.13587	6.19611	5.9098	7.94774	5.86365	10.4405	11.2424	8.09824	cluster_4
shyg5782	18.2774	14.2837	8.77043	7.6071	5.14717	8.01269	8.69049	12.2074	11.3831	13.8973	7.25492	13.5386	cluster_3
shyg5787	18.9101	9.00862	7.43212	8.7232	5.84257	7.18228	0	7.72795	0	8.7123	0	8.18445	cluster_3
shyg5789	6.17272	7.81664	7.48391	6.93246	8.084	10.248	10.6305	10.4049	10.0861	10.431	9.77441	11.0875	cluster_4
shyg5794	0	0	0	0	0	0	9.67419	12.0907	7.20441	0	7.0785	0	cluster_2
shyg5800	12.1181	16.2326	14.6537	12.4663	13.0233	12.7809	12.5102	12.3955	12.5514	12.0573	11.7336	0	cluster_1
shyg5802	7.96922	4.84464	5.56534	5.60108	4.01583	3.64455	7.09806	10.8774	10.9241	12.9618	11.4012	12.4747	cluster_4
shyg5803	0	0	0	0	0	0	4.07283	0	6.7101	9.2839	10.3158	13.7759	cluster_4
shyg5805	0	0	0	0	0	0	0	0	6.60075	13.7002	10.3811	14.0869	cluster_4
shyg5811	0	0	0	0	0	0	0	0	0	9.41034	8.01105	0	cluster_4
shyg5819	0	0	0	0	0	0	12.1632	14.591	15.5302	16.4562	17.4579	17.3285	cluster_4
shyg5821	0	0	0	0	0	4.93854	9.06589	10.9082	12.8962	14.7423	16.6098	11.734	cluster_4
shyg5822	14.679	14.0331	14.4354	13.7901	11.4735	11.8146	13.123	14.0948	11.6245	11.6375	11.4017	9.6662	cluster_1
shyg5823	16.4473	16.3633	16.3078	16.0468	14.8165	15.1977	15.5299	15.5953	14.3524	14.3871	13.0107	12.8411	cluster_1
shyg5826	12.1398	11.275	10.4185	9.79761	7.39287	9.84164	9.60372	10.4694	10.2929	12.8156	13.6445	13.8841	cluster_3
shyg5828	13.7465	14.3944	13.7941	13.5866	13.8816	13.4211	13.6205	13.4083	11.9177	11.9859	11.4576	9.7837	cluster_1
shyg5830	8.19381	6.8955	7.17524	7.34917	7.40684	7.47094	7.71381	7.91054	8.8119	7.75729	9.70221	12.799	cluster_4
shyg5832	10.5204	10.7228	12.1531	11.788	10.4508	8.76857	8.73805	8.50822	7.44993	6.33585	7.09763	7.37971	cluster_1
shyg5833	0	9.97582	10.7538	8.37578	3.65138	2.19512	0	0	10.1163	11.3814	10.1136	12.0444	cluster_4
shyg5834	0	0	0	0	0	0	0	7.80877	0	0	6.38411	0	cluster_4
shyg5835	11.3987	12.3412	12.083	11.9104	11.4982	11.7045	11.4667	11.2988	9.40537	9.1683	9.34835	8.91782	cluster_1
shyg5842	10.2902	10.7384	11.2195	12.6088	10.9538	10.0958	9.19364	9.35443	9.43694	8.11225	7.28202	5.83959	cluster_1
shyg5843	12.4746	13.9095	13.2672	11.8387	10.5562	9.45555	8.62132	9.31089	5.39261	5.44471	5.0054	4.79662	cluster_1
shyg5844	11.9374	12.6924	12.7226	11.5148	9.99583	11.0741	11.3908	12.2164	12.1061	12.9529	13.0162	12.716	cluster_3
shyg5846	12.3307	14.1777	16.083	14.9106	15.6359	15.7788	15.8029	15.9032	16.8386	17.0024	18.1492	17.7632	cluster_4
shyg5847	10.1949	10.1466	10.4596	11.0931	10.9046	10.5148	11.74	11.8464	12.3873	12.6563	11.8005	11.2015	cluster_4
shyg5862	9.52292	9.93984	8.18982	9.25011	9.46459	11.5581	12.8612	13.0206	13.2893	13.4241	12.9147	10.4432	cluster_4
shyg5871	0	4.65007	5.84458	6.02226	6.62556	9.19174	10.5423	9.40274	9.41299	8.14017	10.1409	10.4098	cluster_4
shyg5872	13.0459	15.2948	13.7138	15.7426	14.8718	15.9581	13.0691	13.5777	14.66	11.1081	11.1597	11.7529	cluster_1
shyg5873	0	10.7607	6.80974	9.50353	0	0	0	0	0	0	0	0	cluster_1
shyg5876	0	0	0	0	0	0	0	0	0	8.72125	10.7162	10.8012	cluster_4
shyg5881	15.6857	13.7748	12.9648	11.3795	11.1622	11.9579	12.4352	12.5519	13.0573	13.8086	14.4874	15.1198	cluster_3
shyg5883	16.4225	9.85971	8.43785	6.54971	0	0	0	7.08386	0	0	0	0	cluster_1
shyg5887	0	0	0	0	13.9065	14.4611	0	0	0	0	17.235	0	cluster_2
shyg5891	8.44169	8.68684	12.5943	12.9232	11.2657	10.6363	11.1985	10.0743	10.1132	10.2014	11.7481	12.2768	cluster_2
shyg5892	10.7501	12.6404	13.3198	13.5539	12.4316	12.7654	12.5876	13.5939	13.9009	14.2496	15.7252	15.2533	cluster_4
shyg5893	11.2445	12.5225	11.5632	11.4894	11.2532	10.7986	10.0233	10.0797	12.2767	13.0672	14.1941	13.9936	cluster_4
shyg5894	15.4608	15.3617	16.9876	15.8209	14.9446	16.5442	16.7211	14.9479	16.9229	17.3836	17.943	18.5967	cluster_4
shyg5904	19.0192	18.3523	18.5753	17.5698	18.308	18.4092	18.606	18.4593	18.4665	18.425	17.6468	18.2179	cluster_3
shyg5907	7.73601	7.74766	7.03955	7.7531	9.85386	13.2581	14.7497	15.5495	15.4203	15.9168	16.7801	16.8451	cluster_4
shyg5916	0	11.0885	7.35107	5.55979	8.06428	6.13146	8.11715	0	7.41514	0	8.55295	0	cluster_2
shyg5917	6.11006	7.55011	7.50076	8.83229	10.9498	11.1088	12.7478	13.3989	14.3029	13.9048	16.552	16.0254	cluster_4
shyg5918	7.32437	5.77535	4.61073	5.14981	3.95991	5.03043	5.50904	5.30036	10.7877	12.141	13.817	14.5692	cluster_4
shyg5919	15.776	9.13405	3.6025	0	5.03932	5.32045	8.48551	7.85858	11.4956	12.8883	14.4238	14.9536	cluster_3
shyg5922	15.2722	13.7433	11.3758	12.6982	14.4131	12.8573	13.2097	13.5876	12.5485	13.7433	12.9343	12.5631	cluster_3
shyg5927	4.36232	7.22489	6.95097	5.03434	6.9199	8.53788	11.0578	11.3683	9.54197	8.04965	7.13539	5.05367	cluster_2
shyg5931	0	13.0524	9.81473	7.99588	8.96655	10.3251	11.9336	12.4377	12.0543	0	14.5824	0	cluster_2
shyg5932	11.0516	8.03992	5.59633	7.20111	5.86012	4.75731	7.91506	7.66808	6.94375	9.01444	8.82398	9.01613	cluster_3
shyg5933	17.0209	12.7579	11.2687	9.46015	8.43952	7.15164	10.1206	11.1093	9.77268	12.1768	12.5836	13.2743	cluster_3
shyg5935	16.402	11.902	10.7593	10.2363	7.49939	6.42966	7.6179	10.8105	6.14235	0	8.65616	0	cluster_1
shyg5939	0	0	0	6.30399	7.28252	7.39205	0	0	10.7473	0	0	16.7856	cluster_4
shyg5940	8.3636	9.11434	5.19056	3.64376	7.17647	8.94113	8.5066	0	4.22758	8.81295	6.60633	0	cluster_1
shyg5941	0	15.2544	14.7116	0	13.2015	14.5957	13.2514	0	16.1382	15.0201	17.2683	17.4916	cluster_4
shyg5942	16.5336	9.98656	10.6626	7.40898	7.74829	10.4119	12.8666	12.7311	13.9522	13.9954	14.8718	16.3128	cluster_3
shyg5943	13.2258	15.9271	10.0568	9.50061	9.25848	8.68276	9.89822	10.6833	9.2454	0	9.58514	0	cluster_1
shyg5944	10.5761	9.65017	7.51749	7.79361	8.35193	9.48207	7.33634	8.34077	8.4639	0	6.16834	7.93933	cluster_1
shyg5946	9.05287	11.4392	11.261	11.4634	11.4697	11.1668	11.7066	11.8479	9.76924	10.9714	9.33667	8.63683	cluster_2
shyg5948	15.1054	11.7093	9.91888	8.71805	8.36856	7.5054	8.69378	7.90774	8.57788	0	9.13568	8.55813	cluster_1
shyg5950	13.2373	13.8398	13.5782	12.8512	11.9126	11.2174	11.5788	11.8185	12.2825	11.9457	8.80449	10.4021	cluster_1
shyg5955	0	14.1008	13.0354	10.5815	12.3548	13.9023	14.4949	14.9894	14.9477	15.0161	14.7556	14.1699	cluster_4
shyg5957	5.93368	10.4481	9.72449	8.32794	5.59947	5.99787	6.61876	4.97304	5.01841	8.11494	7.04712	10.0517	cluster_3
shyg5958	12.7774	12.6476	11.6551	8.12714	3.32602	5.38356	4.52839	6.19966	6.58227	7.37639	7.80654	0	cluster_1
shyg5961	7.35883	10.665	10.0473	7.79434	8.71041	9.52473	9.97724	10.0569	9.52661	10.7217	10.6683	9.40624	cluster_4
shyg5962	6.76691	4.63896	4.54711	5.01467	5.57062	6.65922	7.67044	6.58177	10.6582	5.21515	5.6907	7.10495	cluster_4
shyg5963	7.51242	8.95877	8.22236	11.5403	10.226	8.09025	10.424	9.24202	7.57819	8.66296	0	8.67844	cluster_2
shyg5966	15.102	13.9754	13.5113	14.5116	12.2472	9.70404	7.45041	7.95494	4.67083	5.96823	6.84556	3.50513	cluster_1
shyg5970	8.85437	10.1496	5.45068	5.88452	10.1695	10.7378	11.0868	10.9397	11.7655	14.4012	14.9977	15.0558	cluster_4
shyg5984	0	10.4311	7.05101	0	9.62376	6.46131	10.9308	11.2947	10.3416	11.5091	0	0	cluster_2
shyg5987	11.7683	10.7394	7.26202	6.78463	8.73086	2.07542	6.54694	9.73327	2.15111	10.9361	4.97729	8.98326	cluster_3
shyg5988	7.25336	7.13709	8.65827	9.04412	11.304	11.5328	8.56827	13.325	11.7744	15.2207	13.3761	8.5602	cluster_4
shyg5989	12.3248	13.3563	14.4555	15.1115	15.2728	14.9901	14.506	14.196	14.0513	12.5429	12.7782	11.9673	cluster_2
shyg5992	12.8568	13.3846	13.3683	12.1295	9.96191	9.74809	9.54022	0	0	13.0367	0	0	cluster_1
shyg5994	0	5.84728	6.25758	6.70721	6.85681	10.1307	11.2495	13.79	13.4209	13.4679	16.0692	14.1008	cluster_4
shyg5996	15.9721	14.7545	11.4842	9.62872	9.63458	7.78273	7.91268	7.29158	0	11.3812	5.1643	0	cluster_1
shyg5998	17.3099	17.1217	14.7492	16.5863	15.71	15.2302	15.4889	15.5194	14.3034	14.7181	15.0357	0	cluster_1
shyg5999	13.2606	10.5769	9.6258	10.1611	9.30745	10.2755	10.3645	10.1818	8.66325	8.39487	9.28317	12.3427	cluster_3
shyg6000	0	0	0	0	0	7.27921	0	11.9843	12.9598	14.6688	15.4044	15.5861	cluster_4
shyg6001	13.1108	11.2855	0	0	7.88699	6.65291	7.10334	8.92048	6.42884	10.1702	0	8.6983	cluster_3
shyg6003	10.7021	9.2124	8.84086	8.51182	12.0635	13.1303	14.8056	15.1275	15.9973	15.8499	17.1072	17.0871	cluster_4
shyg6004	0	9.0071	0	9.0161	9.66199	11.7008	11.9446	12.1825	12.7097	14.1471	13.476	13.6548	cluster_4
shyg6009	0	5.39177	0	0	0	0	0	0	0	13.4735	9.3445	8.66435	cluster_4
shyg6013	0	8.03662	7.24386	9.62468	12.0559	8.75349	8.20283	7.95454	7.43574	6.95363	8.69368	7.26356	cluster_2
shyg6016	8.84296	8.8868	7.36108	11.3182	13.7697	13.6614	13.0541	12.6054	13.8304	12.6601	12.1201	12.4661	cluster_4
shyg6019	11.4848	9.68985	7.90422	6.52965	6.58815	4.84895	5.55322	0	4.18192	14.5082	0	0	cluster_1
shyg6025	0	0	17.3895	18.8567	18.1997	18.2175	17.9658	19.0158	18.208	18.2135	0	17.2673	cluster_2
shyg6026	0	0	0	0	0	0	0	0	6.30862	8.53196	9.11883	9.06305	cluster_4
shyg6033	0	9.30918	10.4789	7.86752	11.3931	13.1149	14.9355	15.3912	16.5062	16.861	17.9262	17.7713	cluster_4
shyg6043	9.81831	11.0009	13.1136	13.6824	12.6195	13.7373	14.0654	14.3128	13.8732	12.3172	13.3705	13.6092	cluster_2
shyg6044	15.5296	15.3191	14.6832	15.0448	13.6887	12.4229	12.1695	11.9723	12.1738	12.6034	14.0001	13.1575	cluster_1
shyg6045	0	2.1095	1.23003	2.33216	4.04288	5.03198	4.78605	6.84223	7.53722	7.92713	10.0491	8.95382	cluster_4
shyg6046	9.39209	11.1083	11.1187	2.13634	1.59756	3.96162	5.48091	10.8469	5.49242	11.0783	11.5625	9.91354	cluster_3
shyg6048	12.1022	11.6963	11.6021	10.7655	6.66754	9.94924	9.36606	6.19158	7.83421	9.78738	9.40761	7.56565	cluster_1
shyg6049	10.6483	11.5014	12.1737	11.3061	9.66523	5.50658	6.07471	6.41378	4.72834	5.2004	5.43499	6.57368	cluster_1
shyg6052	0	9.31722	0	3.47033	0	3.74702	7.15646	0	5.81724	0	10.4607	0	cluster_2
shyg6055	17.4511	16.3251	16.9223	14.9996	14.0234	15.0088	16.5271	16.6365	16.7687	17.0614	17.097	16.8715	cluster_3
shyg6060	5.25299	5.77014	5.1736	4.84363	4.94809	4.59042	5.71687	6.60894	9.27038	8.81965	10.818	11.5822	cluster_4
shyg6061	5.0385	6.85106	6.92971	4.62325	2.75396	4.60911	3.44032	3.69815	8.2575	5.78527	5.91439	6.66963	cluster_3
shyg6063	6.94814	6.61184	6.16531	4.80129	3.27056	6.90762	9.25886	8.41381	8.71782	9.04577	8.7221	7.77742	cluster_4
shyg6064	0	16.1601	16.9593	14.201	14.5838	14.2361	16.4231	0	16.5797	0	15.9629	0	cluster_2
shyg6065	13.0098	7.56815	8.03808	7.22504	6.02551	5.2605	6.84643	7.77546	7.50739	8.95577	11.6978	9.55715	cluster_3
shyg6066	7.12679	6.00758	4.5069	7.81589	11.2021	10.1534	9.22991	10.3185	8.08746	6.0318	6.18704	8.59528	cluster_2
shyg6075	13.2297	14.3559	14.3809	14.2562	13.7474	14.2626	14.9628	15.1319	14.6945	14.0289	12.1226	13.5783	cluster_2
shyg6078	8.428	9.22941	10.7079	10.4629	7.74862	12.2355	9.06917	10.5645	7.57383	10.6262	10.3138	11.8337	cluster_4
shyg6081	13.7095	12.0861	7.79377	8.57516	6.90016	6.59226	8.99259	10.5081	9.35292	10.5082	9.78938	13.3075	cluster_3
shyg6084	11.0944	11.2338	11.4543	10.4283	9.89672	8.61471	7.534	7.30639	6.97863	10.1361	7.57828	6.99911	cluster_1
shyg6085	0	0	0	0	0	7.17495	9.12738	0	7.16341	0	0	0	cluster_2
shyg6086	8.32131	11.9024	11.6135	10.6523	7.99302	7.56184	4.52792	8.65463	5.76732	9.26166	5.08107	4.57444	cluster_1
shyg6091	4.92035	9.02964	9.94949	5.71365	5.3912	4.73548	7.09166	7.33339	4.64365	8.97629	10.8516	11.042	cluster_4
shyg6095	9.81281	6.10056	7.22917	6.89567	0	6.26158	4.47867	5.37484	0	16.2715	9.93877	0	cluster_3
shyg6098	17.8345	18.151	17.6275	16.7886	16.5323	17.0004	17.9206	16.2667	16.8886	17.744	17.4827	0	cluster_1
shyg6103	13.3716	13.3072	13.4906	13.68	13.177	13.0067	12.635	13.2909	11.542	9.16632	9.90879	5.83421	cluster_1
shyg6110	5.90055	4.23684	6.22716	4.47693	5.2753	6.58381	6.15956	4.34481	11.2583	13.812	16.4097	15.7586	cluster_4
shyg6111	5.63744	4.2009	4.01481	7.43107	6.11163	6.17651	5.28228	7.51265	9.846	11.6743	13.8075	13.1539	cluster_4
shyg6113	7.32327	6.85581	7.6678	7.38199	8.56082	8.78312	9.5457	10.1695	13.1965	15.2348	16.6561	15.9199	cluster_4
shyg6114	8.60884	0	0	6.19519	6.97096	8.67919	7.96263	8.82595	10.2027	13.325	16.7317	16.5107	cluster_4
shyg6116	0	7.64068	7.10443	4.54436	4.36061	5.80896	7.70866	9.82379	7.71642	10.3077	7.5764	9.78009	cluster_4
shyg6120	10.2427	10.4706	10.7393	10.0594	6.30213	7.24084	6.86303	6.65972	6.68693	7.4514	8.65691	9.23244	cluster_3
shyg6127	11.2005	11.8248	11.622	8.56608	11.0622	11.2108	11.1351	11.2431	10.8642	11.8185	11.1395	11.0635	cluster_3
shyg6128	15.3535	15.865	17.1294	15.5608	15.2682	12.2927	13.4928	12.0785	11.547	10.1607	10.2683	11.35	cluster_1
shyg6129	9.35343	11.0486	12.237	8.8073	10.732	9.42356	10.0678	9.93815	10.3872	11.9977	11.2742	10.5151	cluster_4
shyg6132	11.0059	13.5076	11.9037	7.06241	5.08098	6.46435	9.09004	8.41376	8.30874	9.34985	10.027	9.54376	cluster_3
shyg6133	11.0257	9.13032	6.33647	3.48931	5.7249	6.06801	6.93753	8.96125	8.1688	10.2668	6.46237	8.09215	cluster_3
shyg6134	0	0	0	6.02802	8.35533	10.6965	0	0	0	0	9.78859	0	cluster_2
shyg6135	16.7792	16.7883	15.9211	14.8698	14.4064	15.2469	14.849	15.0696	12.971	13.8583	12.9166	15.3666	cluster_1
shyg6136	17.461	15.6721	12.8111	9.75651	9.56194	8.7622	10.9036	12.1588	10.6296	12.2985	10.8029	16.2233	cluster_3
shyg6137	15.2262	16.4688	11.246	5.3184	5.29544	9.3775	12.0936	12.2283	9.19523	12.422	11.4318	13.5151	cluster_3
shyg6138	16.3095	16.6585	13.007	8.91741	6.33821	7.06981	6.94805	9.92358	7.76335	16.4716	0	12.6068	cluster_3
shyg6142	19.4651	9.70975	7.56208	7.95219	7.08461	0	8.27398	7.08883	0	14.793	0	5.61749	cluster_3
shyg6143	4.7773	5.01882	7.42068	4.33818	1.98525	4.80364	6.26174	6.69952	9.7219	0	8.76123	0	cluster_2
shyg6145	12.8748	15.0568	13.2328	15.1328	15.3242	11.1934	10.1348	11.2433	9.91088	11.983	11.8554	11.9551	cluster_1
shyg6149	9.18289	10.486	11.0262	10.3271	8.93312	10.3158	9.54339	12.2305	10.558	10.3951	8.4294	10.7447	cluster_2
shyg6150	15.7278	17.3392	0	0	0	0	0	0	0	0	0	0	cluster_3
shyg6160	10.8728	10.5564	11.4724	10.632	10.2161	10.2433	9.74846	9.92789	9.84926	8.70234	8.05509	7.28455	cluster_1
shyg6161	11.7661	13.2019	13.0751	11.8194	11.7071	13.6077	13.4723	14.1889	14.415	12.6805	11.7813	11.1843	cluster_2
shyg6162	0	7.15126	0	0	0	0	0	0	0	14.5519	13.8904	12.3314	cluster_4
shyg6163	15.6554	12.1331	12.5056	14.2692	14.074	13.8601	11.372	11.3281	11.009	11.3143	10.1774	10.6102	cluster_1
shyg6164	16.0868	16.2664	15.1622	15.6566	15.8124	17.0719	16.0691	17.153	16.5512	17.1144	16.0711	16.8119	cluster_4
shyg6168	6.40383	9.52519	11.0834	7.91805	7.16481	4.65467	4.50051	3.58116	0	0	0	0	cluster_1
shyg6171	7.43991	10.5253	8.07249	5.84415	8.25641	4.01109	5.57372	3.91232	2.48817	4.44391	5.27425	5.08298	cluster_1
shyg6177	15.8416	14.8412	14.2321	14.6475	13.682	13.9327	13.4391	13.3113	13.564	13.8692	14.2383	13.6624	cluster_3
shyg6178	0	0	0	10.7396	14.5346	4.627	6.40004	16.1068	7.05142	11.3173	11.9311	12.3472	cluster_4
shyg6182	14.467	14.1069	13.5011	11.0212	6.25213	6.96087	8.18562	9.5045	6.38121	8.2479	8.7084	9.07743	cluster_1
shyg6183	12.033	14.8499	11.8798	11.707	8.60822	9.76187	9.19969	0	0	0	0	0	cluster_1
shyg6194	12.9928	12.4639	12.9282	10.544	12.2657	11.0311	12.9327	12.3273	11.0116	11.5534	12.5675	13.9076	cluster_3
shyg6195	0	13.5302	11.7875	10.5954	10.1496	10.5306	12.3007	13.5982	11.6629	15.5965	11.1088	12.9078	cluster_4
shyg6198	9.40114	8.8012	10.6647	10.8302	10.7575	10.7579	10.2197	10.7961	8.65092	7.52332	7.57756	7.51537	cluster_2
shyg6203	0	14.1658	14.6109	15.3326	14.0608	12.1991	0	16.3683	0	0	0	0	cluster_1
shyg6204	7.51005	9.71659	9.86878	8.46731	9.84823	10.5298	11.8903	11.1182	9.27271	7.64101	6.72897	4.1867	cluster_2
shyg6210	8.36752	7.87376	6.55449	4.95368	9.99722	12.5327	14.8886	15.7245	14.2658	11.8014	11.2277	12.7083	cluster_4
shyg6212	15.0772	15.2539	14.3551	14.827	14.8955	14.4578	13.7264	13.5919	12.6872	13.0987	11.7266	12.5548	cluster_1
shyg6215	0	10.6044	12.2192	8.90331	8.95204	6.29495	8.92756	0	0	8.26718	0	0	cluster_1
shyg6216	11.918	11.0208	11.9268	12.7172	10.7705	6.99212	7.58051	7.18234	3.82446	5.88638	4.95714	4.16632	cluster_1
shyg6219	18.9434	3.49454	0	7.58227	7.19895	6.80418	6.8628	7.25754	0	0	0	0	cluster_1
shyg6222	16.8113	12.4753	11.8256	7.97571	7.12258	3.94757	0	8.47813	8.60764	14.6047	8.63063	11.4192	cluster_3
shyg6223	14.1772	11.1396	9.57656	7.33178	7.71583	7.9554	9.02363	8.41959	8.45341	10.235	7.79759	14.0765	cluster_3
shyg6227	17.0838	17.2389	17.3537	16.8754	16.2462	13.7178	13.8202	11.5671	11.5775	13.7332	12.6242	13.1604	cluster_1
shyg6228	0	0	0	0	6.89978	7.42918	0	0	7.8637	12.0492	12.0764	12.6234	cluster_4
shyg6229	9.18261	9.53846	7.08686	8.87823	7.21069	8.07042	6.75804	0	6.21479	0	2.5385	6.22201	cluster_1
shyg6230	12.2277	8.29078	4.76639	6.77809	1.47717	4.76872	4.61609	4.85355	2.03669	7.38049	3.60913	4.41566	cluster_3
shyg6233	0	0	0	0	8.74295	9.35207	0	0	0	0	0	0	cluster_2
shyg6240	20.2833	7.2592	6.67668	0	0	0	0	0	0	0	0	0	cluster_3
shyg6241	0	0	0	9.32405	9.04019	11.9293	0	0	0	0	0	0	cluster_2
shyg6243	0	0	8.7458	9.24866	8.74139	8.99385	9.18835	0	0	0	0	0	cluster_2
shyg6245	6.71822	4.80708	7.04822	5.31583	5.50876	6.07379	7.35428	9.43323	6.65849	6.42686	4.67134	8.32699	cluster_4
shyg6246	5.30078	5.4101	5.51632	7.9918	7.41018	8.46371	8.97571	9.47087	9.61293	9.34808	11.8095	8.65223	cluster_4
shyg6247	17.2568	12.4663	10.9353	6.83201	7.55077	7.88232	10.3447	12.0324	10.1872	12.3121	13.0116	13.3871	cluster_3
shyg6252	8.86322	8.86422	10.037	4.56434	5.15322	5.43217	10.3093	9.10197	8.01904	9.30093	5.239	0	cluster_1
shyg6257	9.30068	12.2412	8.96188	6.61108	5.01169	0	4.69018	0	4.59987	6.56218	0	0	cluster_1
shyg6267	17.4889	16.2621	13.3706	15.7976	14.9266	16.4347	16.2349	16.8553	16.3635	15.5122	15.5528	15.4642	cluster_3
shyg6272	19.112	17.4567	16.2684	15.8088	12.5373	15.1054	14.8255	11.7369	11.436	15.71	13.7619	14.1594	cluster_1
shyg6273	10.8294	13.2069	12.7541	10.9988	10.5857	10.3305	11.8092	12.0435	12.4286	12.3358	12.7255	10.8756	cluster_3
shyg6274	0	4.69915	7.475	5.2653	14.565	13.5996	12.1639	9.77935	8.10141	5.70124	8.48737	8.23497	cluster_2
shyg6275	3.91241	4.22333	3.328	6.74442	5.68909	7.48309	6.52086	2.21828	9.25096	8.73368	9.98567	8.69367	cluster_4
shyg6276	0	0	0	8.47495	9.20896	10.2038	12.2878	12.7631	14.9693	13.4511	16.4341	17.4669	cluster_4
shyg6277	14.7366	0	5.78796	5.37463	7.32333	8.72895	8.08036	12.4142	11.9881	11.759	9.66598	0	cluster_3
shyg6278	13.6832	13.3171	15.1632	14.1964	13.4704	13.7453	12.218	12.52	11.1191	11.5059	10.3573	9.17896	cluster_1
shyg6279	0	0	5.88156	4.78632	6.16487	6.04607	6.59428	7.68279	6.95713	9.42741	9.60921	0	cluster_2
shyg6286	0	0	0	0	0	0	9.84838	7.52933	0	10.0523	0	0	cluster_4
shyg6287	11.7971	9.17263	6.8534	4.79247	5.17831	5.03313	7.11797	7.74139	8.15724	10.9892	9.09162	10.3645	cluster_3
shyg6288	17.8448	17.4539	16.6735	16.3527	17.1859	17.5399	17.4791	17.7163	0	0	0	0	cluster_1
shyg6291	11.0352	8.94795	6.32502	3.98706	9.31686	11.4468	12.4498	12.9039	13.0726	13.4731	10.3947	10.3188	cluster_4
shyg6292	0	0	0	0	0	6.24556	8.42899	8.71987	8.19836	11.1162	12.1108	12.4178	cluster_4
shyg6295	7.71458	8.15522	9.16232	9.97972	12.5309	13.7205	15.3821	15.2367	16.7627	16.8266	17.5949	17.1335	cluster_4
shyg6296	11.4154	11.3623	11.8625	11.9145	12.0504	13.1234	14.2002	14.1694	13.5361	13.1933	12.198	11.321	cluster_2
shyg6298	0	6.38929	6.35309	6.34971	7.20879	5.62963	7.91187	8.01796	6.65228	6.27295	0	5.46786	cluster_2
shyg6302	14.1835	11.7212	11.6247	7.57967	5.9524	7.23312	8.69431	9.51579	7.66807	9.38444	10.167	10.0826	cluster_3
shyg6304	5.69504	5.16075	0	6.05166	7.78301	7.51412	8.16574	7.76553	6.91492	8.97154	5.25749	5.91743	cluster_4
shyg6308	0	9.22021	8.79129	7.31833	0	3.71715	4.22605	0	0	0	0	0	cluster_1
shyg6309	18.1927	12.5523	10.4683	10.3566	7.80867	6.8937	9.50527	0	0	0	0	0	cluster_1
shyg6312	12.0623	12.1336	12.1688	12.0696	11.5182	10.7233	9.50439	9.93037	9.36673	9.17163	9.09532	8.2577	cluster_1
shyg6316	13.7033	12.574	13.2993	11.8852	10.9114	11.5733	10.9575	10.1277	10.0347	10.1907	9.83887	10.2627	cluster_1
shyg6322	0	0	0	12.707	12.3801	12.5135	0	0	0	0	16.035	0	cluster_2
shyg6329	13.3509	12.738	12.7585	12.3688	10.5567	13.4616	12.697	9.85205	9.6923	0	12.2593	10.4585	cluster_1
shyg6330	0	0	0	0	0	3.01199	9.36173	10.2129	11.3742	12.2202	11.1859	9.49432	cluster_4
shyg6334	9.87381	9.21147	11.0034	10.8173	9.40449	7.56664	6.70508	6.50101	4.54352	4.66011	3.96622	4.06448	cluster_1
shyg6335	11.7957	11.9368	14.5772	14.9067	13.8128	14.4743	12.5365	13.2886	12.404	13.9358	12.3136	13.8778	cluster_2
shyg6336	10.3134	11.0008	11.0774	10.7137	8.96347	8.03344	8.81484	8.43229	7.84345	7.54721	7.18221	5.2908	cluster_1
shyg6337	0	14.6463	14.6889	10.2392	12.16	12.1207	10.3177	10.2993	10.2777	10.7262	10.6312	10.7741	cluster_2
shyg6338	10.8232	12.1233	12.3135	11.4834	10.9783	11.0016	10.8771	11.2085	10.7561	10.3822	9.31851	8.22629	cluster_1
shyg6340	15.6732	15.3209	16.9677	15.5668	10.817	1.20135	0	7.57008	0	8.17384	7.23984	11.9695	cluster_1
shyg6341	11.6738	14.1858	14.0193	12.0801	10.8417	10.4014	10.6493	12.5679	10.9047	11.2862	9.52164	11.5037	cluster_1
shyg6343	17.1052	0	0	0	6.9876	0	0	0	0	0	0	0	cluster_3
shyg6346	0	0	0	7.11038	0	8.02575	0	0	0	0	12.3361	14.9829	cluster_4
shyg6347	0	15.1398	14.6591	12.3587	11.2642	12.4908	13.5589	13.2508	13.4542	14.469	16.6552	14.6431	cluster_4
shyg6348	9.99633	7.9561	9.21631	8.71915	8.18611	9.43757	8.80276	9.41213	10.6213	12.2765	13.3546	14.3656	cluster_4
shyg6349	9.85084	10.277	7.90375	6.52251	5.85196	5.78591	6.21355	6.48394	6.6842	9.56822	8.14099	8.86609	cluster_3
shyg6350	16.3268	15.8418	16.1456	15.8826	15.7965	15.945	15.9557	16.0574	17.135	17.6661	18.5544	17.7694	cluster_4
shyg6351	14.2392	15.2495	14.4565	14.9117	15.1598	15.2487	15.6074	15.6322	16.3573	16.893	17.4964	17.2683	cluster_4
shyg6353	16.0942	16.1517	16.8278	16.9759	17.1195	17.0664	17.0761	17.1119	17.52	17.8745	18.4145	18.3673	cluster_4
shyg6354	14.4428	16.0553	15.9777	16.169	16.2939	16.3062	16.5784	16.6253	17.0655	18.2762	18.9866	18.6923	cluster_4
shyg6355	16.0799	16.705	16.3582	16.1014	16.1197	16.0474	16.2738	16.4226	16.875	17.7346	18.0082	17.538	cluster_4
shyg6356	12.8647	12.9697	12.0939	9.22883	10.2091	12.0825	11.6949	9.06679	11.0858	12.5417	12.6969	14.6573	cluster_3
shyg6357	0	0	7.7497	10.5735	9.22709	9.54226	7.04041	6.74272	7.12262	9.31073	8.76472	8.28917	cluster_2
shyg6358	10.1813	9.12419	7.87612	5.75021	8.06323	8.43008	8.99436	11.0177	11.5411	14.1286	16.3616	15.0595	cluster_4
shyg6360	0	0	2.39977	2.08469	3.09071	5.23777	8.09353	7.93389	10.4783	11.3161	12.7453	13.6072	cluster_4
shyg6361	11.5652	7.87455	9.72854	6.05879	7.93528	8.72937	11.3071	12.2513	11.1517	12.5246	8.00573	10.2058	cluster_3
shyg6365	8.72542	11.4781	12.8499	10.0301	10.3837	11.6683	13.3677	13.5587	14.0151	13.5258	13.9633	12.5945	cluster_4
shyg6368	15.2103	15.5543	14.3126	12.8448	12.2356	8.79104	10.3859	8.70946	7.86468	10.3848	9.41523	8.9092	cluster_1
shyg6369	11.3706	12.9858	14.1859	14.6191	14.9711	15.7436	15.0973	15.0626	14.5091	13.3479	13.8241	13.9951	cluster_2
shyg6372	8.2897	11.5147	9.78226	6.83548	6.10898	6.12802	2.71811	7.60289	2.86987	8.96112	4.66233	4.7473	cluster_1
shyg6373	10.2189	7.70667	9.02968	7.92818	8.36478	8.13476	5.29768	7.66233	7.16593	7.95199	10.7992	10.3855	cluster_3
shyg6376	14.1105	14.3081	14.5443	13.1999	12.8937	12.29	12.9045	12.3111	12.6858	10.8194	10.3899	10.5381	cluster_1
shyg6378	0	13.7376	12.0357	7.26474	3.75438	8.41234	0	0	0	11.881	12.0472	0	cluster_1
shyg6379	7.89464	8.29439	7.53146	9.07554	12.2687	11.3605	11.9338	10.4897	13.0908	12.1794	10.9163	14.1626	cluster_4
shyg6380	0	10.8808	0	0	7.74666	8.32321	10.6109	0	9.73797	0	9.52682	0	cluster_2
shyg6384	13.5817	14.8519	15.3142	14.9009	12.7885	13.233	13.1346	12.3528	11.3897	10.9892	8.51167	9.04084	cluster_1
shyg6388	13.3172	9.29977	8.41938	9.55114	8.07376	7.75314	11.7175	10.0124	12.0465	13.2249	14.1485	13.6736	cluster_3
shyg6389	17.3416	14.9807	12.8653	7.79063	7.71789	11.8365	12.9278	12.8533	12.4923	12.408	9.88671	11.3248	cluster_3
shyg6393	17.7379	17.3838	14.7843	17.6017	17.1514	17.6855	17.7097	17.8578	18.5449	19.0039	19.4228	20.7221	cluster_4
shyg6394	0	0	0	0	6.86593	4.2386	5.60706	6.59135	6.96611	11.6924	10.1571	11.4398	cluster_4
shyg6400	12.9664	13.758	14.4819	14.5288	12.8262	13.5707	13.0591	12.7658	12.7395	12.5318	11.7199	10.1274	cluster_1
shyg6401	9.41467	9.13441	9.59902	6.46171	9.11828	9.9859	7.48416	10.7733	10.9848	11.158	15.4497	16.098	cluster_4
shyg6404	13.3437	12.9006	13.4598	13.2139	12.4236	11.44	11.8075	11.5547	11.5867	10.8347	9.47785	9.37871	cluster_1
shyg6405	0	12.0255	11.9042	7.25682	7.29512	8.08538	9.17527	0	0	0	0	0	cluster_1
shyg6407	13.9865	15.4789	15.4359	15.2307	14.9591	14.62	14.8245	13.75	13.3194	13.2161	12.144	11.3992	cluster_1
shyg6408	0	0	0	6.66211	7.64719	0	0	0	7.13925	15.1118	13.8457	16.7649	cluster_4
shyg6409	0	0	6.09402	5.78696	8.88315	0	4.56385	8.59551	11.0361	16.8794	16.0007	14.0829	cluster_4
shyg6427	0	0	0	0	0	3.74539	0	7.37042	8.95328	0	9.46151	11.0236	cluster_4
shyg6433	9.04488	8.62454	0	7.04284	7.98223	9.01314	9.04761	9.3297	9.40243	9.42616	12.5363	12.7078	cluster_4
shyg6440	12.136	12.4781	15.3049	13.9934	13.9208	13.7041	14.5962	14.3645	12.7073	0	11.7173	10.6713	cluster_2
shyg6441	0	0	1.40849	0.942195	0.985502	3.84221	6.78276	6.21063	5.8141	10.4407	13.5282	10.2873	cluster_4
shyg6443	12.6028	12.8171	13.3753	13.8977	13.8845	14.2072	14.2304	14.7088	14.9911	15.6665	16.2109	15.4425	cluster_4
shyg6445	12.1671	10.9283	11.6778	10.8828	10.768	12.5959	13.8271	15.2447	15.7125	16.443	16.7999	16.7539	cluster_4
shyg6446	14.3253	0	9.72702	0	0	0	9.93738	10.0295	7.98185	10.805	11.7914	12.1078	cluster_3
shyg6457	15.647	16.1343	15.2505	14.4686	12.1902	11.17	11.4139	10.9486	11.156	11.253	11.4919	14.374	cluster_1
shyg6459	12.7877	13.0274	14.2834	14.2374	14.4863	13.0499	12.2179	12.1433	11.2473	10.4282	10.5125	8.15829	cluster_1
shyg6460	16.742	14.7736	11.7291	12.8264	12.9375	11.812	13.0196	13.9724	12.5828	18.5539	0	17.5657	cluster_3
shyg6461	12.4929	14.4038	14.4282	16.2598	17.1589	14.6269	13.5705	12.8769	11.2996	10.7681	11.2629	10.5908	cluster_1
shyg6465	0	0	0	0	0	0	0	0	14.2138	15.7922	16.8834	17.0969	cluster_4
shyg6466	6.00051	6.66423	7.10669	7.6395	10.4545	11.4625	13.0227	13.2838	14.9534	14.8975	16.5837	15.8747	cluster_4
shyg6467	0	6.50507	9.96683	5.6771	5.8926	7.53082	10.0655	12.1605	13.54	14.0015	16.1744	15.9461	cluster_4
shyg6468	0	6.86472	3.1371	2.9527	6.46282	4.3786	6.39166	7.68336	7.88801	9.00136	10.1516	10.7228	cluster_4
shyg6469	4.15918	3.67497	4.74347	4.4326	8.10144	4.93293	6.86037	2.07698	8.11662	10.1027	14.4405	10.7476	cluster_4
shyg6475	0	7.77791	6.65459	8.56399	6.54777	8.93656	11.1384	10.8387	11.6806	12.8432	13.0817	12.0548	cluster_4
shyg6476	0	0	0	0	0	0	7.10353	7.78026	7.63426	10.435	9.54078	10.1862	cluster_4
shyg6481	12.9822	11.0647	9.31535	9.55009	8.63642	7.72603	7.02624	9.49957	7.26532	10.0172	10.6284	10.803	cluster_3
shyg6485	14.4735	12.0297	11.1074	7.74554	7.21483	6.1978	6.39906	8.32907	6.05696	10.1568	9.34603	0	cluster_1
shyg6486	9.11494	10.9826	12.9477	11.5662	11.4787	12.6283	13.0284	13.4339	11.9355	12.2018	8.45198	9.67966	cluster_2
shyg6490	6.75964	9.62639	10.7197	10.3963	9.84851	8.80519	10.7308	10.026	7.77789	8.06081	7.52556	6.91259	cluster_2
shyg6491	0	0	0	0	0	2.00399	5.36285	5.64926	7.02271	9.42825	6.95705	0	cluster_4
shyg6494	8.89202	12.5563	13.0718	12.1855	10.176	9.66722	9.9607	7.76027	7.66052	8.18641	7.66176	4.88011	cluster_1
shyg6495	13.0562	13.5613	12.4525	11.3977	11.6447	12.7157	13.7265	14.2475	14.3022	14.9623	15.3326	15.0733	cluster_4
shyg6496	12.2664	12.0558	11.8201	12.5742	12.0716	11.5298	10.7545	9.76377	7.86057	7.99232	6.98732	9.12296	cluster_1
shyg6503	17.3783	16.3397	0	7.12981	0	7.09358	9.01579	0	7.45137	18.1948	0	0	cluster_3
shyg6511	0	9.44916	10.3341	10.2157	8.08598	7.5002	10.2666	10.1706	11.6966	11.992	12.9	13.956	cluster_4
shyg6515	0	8.93199	7.10196	6.5011	4.47146	5.95313	8.5358	7.39486	9.68596	10.2574	13.7221	11.1813	cluster_4
shyg6519	10.9286	13.3198	13.7132	13.6641	13.2149	12.7873	12.7267	12.824	11.8359	11.0401	8.59799	7.95534	cluster_1
shyg6520	15.4314	15.6623	17.155	16.9637	17.0224	17.4729	17.3046	17.2586	17.1384	16.568	16.9406	17.4936	cluster_2
shyg6521	14.0183	12.7397	12.9761	12.3911	11.5617	11.9559	12.6377	13.3045	11.2915	11.7691	9.93234	9.40266	cluster_1
shyg6522	12.9088	13.7652	13.5504	13.5092	14.0656	14.2486	14.4064	14.4007	13.8679	14.1355	12.7979	12.6924	cluster_2
shyg6524	0	9.67363	9.99405	5.15482	0	5.60244	0	0	0	0	0	0	cluster_1
shyg6525	0	0	0	10.893	9.4202	0	11.5906	13.4253	15.2331	16.691	17.0005	16.645	cluster_4
shyg6528	0	0	9.54739	0	0	0	11.5882	0	0	18.893	14.6214	15.6861	cluster_4
shyg6529	0	6.26936	4.88246	7.19907	10.2024	11.5061	11.2771	8.85677	13.7461	14.9472	15.7755	16.4663	cluster_4
shyg6533	12.9495	14.2906	13.6628	13.807	12.6785	13.2501	13.5871	13.4955	13.027	11.608	10.5176	9.76199	cluster_1
shyg6534	7.7321	9.80326	8.32718	6.59103	4.88758	6.00316	5.55686	6.12123	5.71292	7.468	6.3753	9.29224	cluster_3
shyg6539	0	15.4395	14.6534	12.7799	11.2475	13.8195	13.8586	14.7671	14.1834	14.7805	15.5117	16.0393	cluster_4
shyg6540	0	0	0	0	0	0	0	0	12.0208	14.8477	17.2848	16.4732	cluster_4
shyg6542	11.7448	16.5935	15.9487	16.0506	12.7025	9.79969	10.5316	9.17132	9.2096	9.24838	9.78662	9.802	cluster_1
shyg6545	10.4018	12.8067	13.6755	14.5178	13.7782	10.464	9.78667	9.4626	10.5695	10.3622	8.83204	8.2779	cluster_1
shyg6550	13.4537	15.3312	11.5596	13.4036	12.931	12.7151	13.3663	14.2873	13.8867	13.9472	14.7206	14.3217	cluster_3
shyg6552	18.6052	16.7061	16.9732	16.6588	13.0982	13.9726	14.1881	14.92	14.3092	17.3488	16.4244	17.1964	cluster_3
shyg6553	9.74211	11.3786	9.71307	8.53037	6.34658	5.27125	6.83181	6.66328	6.22639	7.06409	7.14835	7.14337	cluster_1
shyg6554	12.3445	12.674	11.6282	11.7515	13.0208	12.1845	13.1323	12.937	13.8221	14.5584	15.3341	15.4152	cluster_4
shyg6556	12.6193	12.8327	13.2157	14.9608	12.5576	13.413	12.7145	9.16247	11.6661	12.1358	11.1541	11.3095	cluster_1
shyg6557	9.43352	11.5961	10.9909	10.508	10.3172	11.8409	11.7987	12.4185	11.9613	12.6155	11.1675	12.1576	cluster_4
shyg6560	7.66376	10.486	11.0353	11.524	10.2397	9.87414	10.3076	9.96438	9.90196	9.59792	8.27608	9.10373	cluster_2
shyg6561	18.1295	0	0	0	0	0	5.88247	7.06658	7.08542	10.0038	11.6733	11.6393	cluster_3
shyg6564	13.7787	13.8758	13.9227	13.117	12.7341	13.7138	13.7911	14.4725	14.4092	13.4151	11.6336	12.263	cluster_1
shyg6565	13.668	14.6658	14.4155	13.9674	12.5947	12.139	11.9381	12.4355	11.377	10.3433	9.97221	10.4488	cluster_1
shyg6566	10.2382	11.7883	12.2977	11.682	8.98609	8.35749	7.7942	7.91112	7.26073	5.41259	6.38836	5.39311	cluster_1
shyg6568	8.57945	10.8832	11.7657	9.43309	8.22773	7.92966	8.9785	9.16211	8.21046	8.24795	6.11231	8.87916	cluster_1
shyg6572	10.0542	9.49524	9.29891	8.37537	7.81456	7.56265	9.371	9.33444	7.6889	9.35553	7.59979	8.51987	cluster_3
shyg6573	0	10.9532	10.5518	9.03611	8.86547	9.58103	10.7847	8.29187	0	0	0	0	cluster_2
shyg6574	11.2879	13.9579	12.2383	13.9799	14.0421	14.4711	12.0156	13.9075	12.5666	11.8845	10.6331	9.3205	cluster_2
shyg6579	16.249	13.0448	14.6535	13.4935	10.2789	5.43996	5.05271	4.15659	4.58753	4.98515	4.91739	5.19322	cluster_1
shyg6581	11.717	9.52117	5.72612	5.90596	1.46804	5.91919	11.1907	8.72251	6.73153	9.17889	7.80472	9.27601	cluster_3
shyg6583	14.6018	16.6386	16.4263	13.7572	12.5072	14.1433	0	0	0	16.42	17.38	16.8497	cluster_3
shyg6584	16.5234	12.1605	9.48964	10.2179	0	0	9.36907	8.95344	0	0	5.98493	0	cluster_1
shyg6585	16.1125	13.053	11.7879	10.8817	8.86579	0	7.32823	0	0	17.369	7.78387	0	cluster_1
shyg6586	15.3669	14.4189	15.6707	14.788	11.0532	5.22637	2.34688	0	0	0	4.29481	0	cluster_1
shyg6587	10.7522	11.6484	12.2919	11.2573	8.5699	8.06473	9.93819	8.33176	6.8372	9.23607	7.87392	7.19642	cluster_1
shyg6594	0	5.11829	0	8.34017	0	6.08741	0	7.22764	5.08184	9.76296	13.4123	13.3395	cluster_4
shyg6595	9.07155	8.02283	8.5278	7.63283	7.0954	7.68386	7.49355	7.50557	8.06144	11.4898	11.6372	12.8553	cluster_4
shyg6599	0	11.2329	8.86363	4.22073	7.33451	0	0	0	0	0	0	0	cluster_1
shyg6601	12.2258	13.1309	12.242	12.8381	13.5882	14.1022	14.3499	13.9942	14.89	16.5015	16.0313	15.5309	cluster_4
shyg6604	9.94727	6.83766	0	0	8.58165	9.29568	8.18577	12.691	11.0513	13.0604	15.6837	16.7717	cluster_4
shyg6605	0	0	0	0	0	0	0	18.641	18.4167	0	19.0183	0	cluster_4
shyg6606	0	0	0	0	0	4.3721	9.88085	9.87872	11.4856	13.1059	14.1026	11.882	cluster_4
shyg6607	11.5935	12.4118	13.6378	13.2107	12.9271	12.2961	12.2939	11.4608	10.5465	11.0223	10.887	9.82559	cluster_1
shyg6617	15.2693	16.6269	16.4628	15.6985	14.6982	15.1018	15.0175	14.827	13.438	13.9323	13.7271	12.7303	cluster_1
shyg6618	17.9755	17.4889	17.8137	16.3841	15.4235	16.0509	16.1859	15.7218	14.8515	14.9381	15.1568	15.2233	cluster_1
shyg6619	16.3034	7.94117	0	7.48108	6.84924	6.26459	0	0	0	16.6836	0	0	cluster_3
shyg6621	13.2537	12.112	12.1417	12.2526	11.7637	11.7356	11.864	11.2693	11.5543	10.3979	10.6057	8.59977	cluster_1
shyg6624	0	10.2722	7.46582	9.30297	13.72	14.6225	16.1672	15.631	16.7975	16.8589	17.5987	17.2225	cluster_4
shyg6635	12.8982	12.7033	13.4593	13.5889	11.9005	12.1103	12.1259	12.34	11.6768	10.7452	10.7353	9.26927	cluster_1
shyg6636	15.2763	15.3237	15.6087	15.103	12.9602	12.782	12.2765	11.9775	11.0224	9.95317	9.48098	8.98104	cluster_1
shyg6637	16.4912	15.9992	16.4684	16.1839	16.2992	14.9203	14.4935	13.5034	13.998	12.7062	12.7823	13.5175	cluster_1
shyg6638	17.2436	16.8701	17.2085	15.7486	15.6763	15.4517	15.6725	15.472	13.6076	14.0279	13.7983	13.7927	cluster_1
shyg6640	4.27914	6.66291	9.13535	7.30068	6.032	8.83627	6.38203	8.30235	8.71758	8.91603	9.32742	9.51178	cluster_4
shyg6641	17.6281	16.0717	6.42397	4.66937	7.90837	5.55953	7.77358	8.03298	8.30352	12.6922	11.8706	0	cluster_3
shyg6644	12.7054	9.24493	5.97222	4.9365	5.42602	3.45155	4.78366	5.35867	3.41627	7.74909	10.344	9.92312	cluster_3
shyg6645	0	0	0	11.1945	0	13.4411	12.5691	0	0	0	0	0	cluster_2
shyg6648	19.2041	0	0	0	0	0	0	10.3759	0	0	9.43034	10.9073	cluster_3
shyg6650	8.83871	11.432	13.0199	12.6425	11.3462	9.7167	9.34314	8.72767	8.98363	8.63279	8.87896	8.08284	cluster_1
shyg6652	11.2316	10.5727	11.8652	12.4558	13.1994	14.6335	13.5167	14.3095	15.2865	14.3721	13.2869	12.9527	cluster_4
shyg6656	8.99742	6.87027	0	5.3063	5.87609	6.73654	8.80834	11.4357	7.73558	11.9491	10.5932	7.96706	cluster_4
shyg6657	12.7586	13.7712	14.0817	14.6742	16.157	15.657	15.2277	15.1049	15.5309	15.5168	16.241	15.074	cluster_4
shyg6664	0	0	0	0	0	6.77472	6.34456	11.2072	13.1583	13.843	13.8563	15.1045	cluster_4
shyg6666	13.9088	13.94	14.2572	15.089	13.1293	10.1099	9.64815	8.96743	9.24041	9.85302	9.47365	8.43719	cluster_1
shyg6668	16.6987	14.147	7.05556	0	9.36734	7.07568	10.3519	11.7041	8.2913	0	7.93467	10.3905	cluster_3
shyg6669	19.15	16.7822	0	12.0936	8.63576	14.5468	13.7871	13.737	12.8983	0	0	0	cluster_1
shyg6670	12.1565	13.1229	12.4961	13.5531	11.6971	8.79547	8.17796	6.53055	7.82477	8.20276	6.77884	5.76531	cluster_1
shyg6672	0	3.86653	3.82909	3.83901	1.21087	4.41556	6.92013	4.65962	9.59073	10.1807	10.7081	9.73382	cluster_4
shyg6673	8.58067	11.3663	8.29507	9.31084	8.10655	7.27418	7.7678	6.02281	4.32112	3.30171	3.8295	6.08281	cluster_1
shyg6674	16.2306	17.0929	0	8.38087	0	0	0	0	0	0	15.3846	0	cluster_3
shyg6675	14.3967	14.7267	13.8923	14.1053	13.5882	12.4234	12.1927	10.7827	10.9224	11.5984	11.0882	9.8576	cluster_1
shyg6678	11.931	12.389	11.9616	11.2687	10.7306	9.46123	9.55982	8.47027	8.29109	8.66059	6.4147	5.26494	cluster_1
shyg6683	10.7724	11.9246	12.0089	12.5941	10.6269	9.58963	9.07086	8.15016	8.15651	8.02004	6.77137	7.44179	cluster_1
shyg6684	14.1064	15.7893	15.6742	15.0367	14.0615	14.5695	14.6956	14.5523	14.1468	13.9158	12.338	11.4443	cluster_1
shyg6686	10.599	12.2718	12.4576	12.7429	12	11.8921	11.2591	11.2183	9.60478	9.42438	8.37956	9.39155	cluster_1
shyg6688	8.68171	9.63866	11.8951	11.2941	11.3194	11.7254	12.2742	12.136	10.07	7.78452	7.73289	5.21683	cluster_2
shyg6689	13.4813	15.8012	14.568	11.2358	11.7684	11.1874	0	0	0	13.8914	0	16.3639	cluster_1
shyg6691	8.47789	12.0011	11.1111	12.0881	13.0971	13.7054	13.6858	13.7995	14.3944	13.2075	8.47225	11.3528	cluster_2
shyg6692	10.1576	13.3103	12.0883	13.5253	14.1818	14.5942	14.6891	14.547	15.3314	15.6211	16.6768	16.2359	cluster_4
shyg6693	11.8459	11.1494	12.19	9.73886	8.96	8.67096	9.65917	11.2505	9.79422	10.2469	10.6031	10.3753	cluster_3
shyg6694	10.2814	12.8071	11.6934	10.2959	8.99629	8.67762	10.5758	10.4627	11.3321	11.4217	12.8499	12.8976	cluster_3
shyg6695	14.4347	11.838	5.60826	0	0	0	0	0	0	0	0	0	cluster_3
shyg6696	14.6693	14.6278	14.4395	10.0252	6.90783	8.56271	10.4231	10.325	7.07657	7.68206	6.09079	8.00347	cluster_1
shyg6697	7.09463	14.0964	11.3295	8.03178	5.48929	7.27741	7.32552	4.63093	2.59799	4.08813	3.95421	1.65319	cluster_1
shyg6699	0	11.1543	0	0	0	0	6.16218	8.52392	0	0	7.82909	0	cluster_3
shyg6700	8.29877	9.12896	8.39061	4.87056	4.75437	4.44438	4.20252	5.19365	3.39532	5.71316	5.58601	0	cluster_1
shyg6701	10.7476	11.3655	11.5306	11.2879	12.2094	11.3271	12.0237	12.4583	12.8793	13.0198	9.5856	10.095	cluster_2
shyg6705	13.783	15.5013	0	0	0	0	0	0	0	0	7.78795	0	cluster_3
shyg6706	8.00826	9.59797	8.96566	8.81545	7.19679	7.4426	7.40298	6.88385	8.67664	6.99296	7.28814	4.72297	cluster_1
shyg6707	12.0671	12.4879	9.73312	8.48886	7.9305	7.16253	7.09784	0	6.66925	12.6933	14.0777	10.6272	cluster_3
shyg6708	11.6162	16.456	15.3358	10.045	9.3857	7.05207	11.6888	11.3199	4.01977	12.2444	7.12884	0	cluster_1
shyg6711	7.57265	11.5959	11.7517	10.9384	9.67499	10.9916	9.31413	11.6939	11.8013	12.5952	15.0284	14.1474	cluster_4
shyg6712	10.4547	13.3759	13.5367	9.87896	9.91955	8.34957	10.5762	8.5898	10.879	9.70769	10.2507	9.75921	cluster_1
shyg6713	12.9651	10.8204	10.7433	10.4983	10.0852	9.73589	8.69957	9.80253	9.13713	10.4729	8.42373	8.46327	cluster_1
shyg6715	14.658	14.8883	15.1104	14.8746	14.8736	14.5525	14.3389	14.3928	13.9522	13.8569	12.9411	12.3856	cluster_1
shyg6716	15.0216	15.186	12.5943	11.5156	9.69904	11.1388	11.3473	11.7077	10.2727	11.9318	0	0	cluster_1
shyg6717	7.41547	11.8931	9.12897	8.92944	7.69625	4.3666	6.60344	4.45881	5.23015	4.57968	6.5345	4.15816	cluster_1
shyg6721	10.3199	12.0056	10.388	11.2402	10.596	10.4162	9.5142	8.18118	8.70235	7.31436	7.13992	7.04084	cluster_1
shyg6722	10.1832	12.4291	13.7536	13.669	14.41	13.1597	11.6076	11.3555	9.93352	10.0151	5.51893	6.84466	cluster_1
shyg6723	9.46485	12.3037	12.1573	12.7099	14.0712	14.5159	14.7092	14.7176	13.3949	12.3767	10.8114	8.47734	cluster_2
shyg6726	11.7346	12.1493	10.8308	12.4969	11.1885	12.8998	10.4078	12.239	12.8282	11.0021	12.7313	8.70626	cluster_2
shyg6727	8.33369	10.0156	11.4851	11.7912	12.7612	13.8019	13.8348	14.1292	14.9325	15.1231	15.2526	13.4731	cluster_4
shyg6728	13.0466	13.908	12.9623	12.7007	15.0657	15.6308	15.1517	15.36	15.5254	13.0735	13.1095	13.1662	cluster_2
shyg6729	0	8.63983	0	0	0	0	7.02858	0	8.44327	0	12.5503	11.5386	cluster_4
shyg6731	9.38319	12.3342	13.124	11.5896	9.79851	10.1912	9.72647	9.19329	8.39791	10.4351	8.83546	7.82219	cluster_1
shyg6732	0	12.4504	9.33772	6.39788	0	4.95995	8.90892	10.0934	0	0	12.2107	0	cluster_2
shyg6739	0	0	0	0	0	6.34914	0	12.1506	0	0	0	0	cluster_2
shyg6770	11.5849	13.0469	13.9403	14.3297	14.5905	14.9887	15.7987	15.6191	15.1251	15.0044	15.0864	14.8013	cluster_4
shyg6771	17.1945	0	0	0	0	0	0	6.93839	0	0	0	0	cluster_3
shyg6773	13.9392	10.3681	8.66161	7.5328	6.11153	8.22057	6.50476	9.17724	7.41051	9.08652	12.0361	12.0582	cluster_3
shyg6774	0	0	5.98106	4.49842	4.0871	6.44533	6.32007	10.1699	10.3079	9.05356	14.6505	14.9931	cluster_4
shyg6775	0	0	3.99574	2.9052	4.08426	4.66786	6.96873	7.27585	10.3985	12.1809	13.9987	15.1485	cluster_4
shyg6776	5.60957	5.95177	5.95463	6.92458	9.24877	10.5796	11.4386	11.5561	13.9854	14.8938	17.1279	16.6515	cluster_4
shyg6777	0	1.38417	1.59404	1.36703	4.16604	4.40815	4.84236	6.57371	10.5753	12.5909	13.7861	13.4398	cluster_4
shyg6780	13.2286	12.579	11.8091	12.2159	7.7586	4.95703	6.49356	5.6023	0	7.5504	0	0	cluster_1
shyg6782	0	0	0	0	0	0	6.41803	0	5.72508	0	9.21728	10.3467	cluster_4
shyg6784	8.70089	10.5609	11.1669	10.794	11.0343	9.34337	9.55322	10.7059	10.6836	11.7505	9.93234	9.95057	cluster_2
shyg6787	0	12.7288	13.5692	6.86011	6.01979	0	8.51446	0	0	0	0	0	cluster_1
shyg6789	12.3154	14.3055	12.6466	9.46478	4.40988	7.49515	9.55065	8.07528	7.47344	9.19686	9.76461	9.30128	cluster_3
shyg6793	6.64384	3.90992	4.70193	4.77702	7.0233	11.3735	6.48899	6.97373	6.82081	5.98081	4.20193	6.66065	cluster_2
shyg6794	5.04129	7.6922	7.5361	11.9291	12.3659	8.84288	7.20291	5.28882	8.18771	5.62357	3.73976	4.73344	cluster_2
shyg6799	13.118	12.7495	11.915	9.06708	7.65856	10.1072	11.8496	12.2477	12.6701	14.605	14.3773	15.4515	cluster_3
shyg6800	0	13.833	0	9.40698	11.7086	11.0641	0	0	0	0	0	0	cluster_1
shyg6802	12.3907	12.3123	12.6103	12.8763	11.9059	12.5837	12.5268	12.5742	12.7418	12.16	10.9061	10.79	cluster_1
shyg6804	0	16.257	14.2534	7.22469	9.66689	11.554	12.7168	13.2518	13.6358	17.7349	12.5208	0	cluster_2
shyg6808	0	9.2266	0	9.40882	7.18269	6.35881	10.177	7.99951	11.2522	0	0	0	cluster_2
shyg6813	13.4409	13.02	11.3242	5.81574	0	2.85533	5.60775	7.65809	4.5681	11.1951	0	16.8856	cluster_3
shyg6815	0	9.57915	7.49968	4.35265	3.01556	4.23252	4.49644	0	6.67972	8.25236	8.59203	8.94927	cluster_4
shyg6818	14.6713	12.2709	10.2382	9.15019	9.3033	8.67014	8.27549	11.3132	9.36697	11.9163	11.9996	10.2935	cluster_3
shyg6820	8.98956	10.1853	10.3464	10.9354	8.92153	10.4847	10.3264	9.10157	9.90539	6.62095	7.659	9.234	cluster_1
shyg6822	13.5572	11.4568	13.0362	8.47955	6.69184	4.82795	4.23891	6.88016	7.42063	6.93313	5.71944	9.47027	cluster_3
shyg6824	10.4394	12.8939	13.4324	12.7827	12.599	12.5955	11.9093	11.4313	10.1839	10.613	9.6453	8.21516	cluster_1
shyg6832	12.9044	11.9384	10.8498	7.58492	7.78866	9.31486	12.1351	12.3238	12.4063	14.5313	17.1682	16.7554	cluster_4
shyg6834	0	0	9.3273	6.80251	8.69786	11.2437	14.4259	12.6608	11.7959	12.5263	10.4283	10.9408	cluster_4
shyg6836	11.6401	12.0539	13.6586	12.5302	12.6156	12.082	12.1543	10.8808	11.6657	9.96823	10.687	10.8244	cluster_1
shyg6837	13.391	15.0783	14.6143	14.8963	14.9545	15.4139	15.2719	15.4108	14.9905	13.0127	12.7041	12.4687	cluster_2
shyg6838	15.0414	14.65	14.8485	14.7632	14.7166	15.2955	15.3716	15.5693	15.2248	14.2864	14.7221	14.0694	cluster_2
shyg6839	0	14.9287	0	0	14.1546	14.2722	15.7528	17.1614	15.9074	0	0	0	cluster_2
shyg6840	0	0	0	0	0	0	11.2229	12.8602	13.4681	14.3214	13.5136	13.9222	cluster_4
shyg6842	17.1745	16.2636	11.6354	10.0079	8.01769	8.16914	9.54239	9.14047	8.41756	14.9645	0	0	cluster_1
shyg6844	7.97769	11.9249	12.1414	11.3465	7.86325	5.96781	4.42159	7.57615	5.07038	5.46209	6.90499	5.16372	cluster_1
shyg6848	8.04405	10.6036	10.0711	13.9567	14.2535	12.053	12.2237	12.255	10.7088	9.37259	8.37564	9.6563	cluster_2
shyg6849	12.8408	11.3015	8.91996	5.26985	5.73638	5.84839	4.66719	6.9898	3.55504	0	0	0	cluster_1
shyg6858	11.8203	13.1362	13.4718	11.055	9.62357	10.4186	10.6707	11.0036	10.3398	10.8604	0	0	cluster_1
shyg6860	0	0	0	9.74682	9.32429	7.24156	0	0	0	0	14.6526	0	cluster_2
shyg6861	15.5165	14.3314	13.312	11.6914	11.064	11.0155	11.1232	10.6153	12.9184	13.853	14.4448	13.95	cluster_3
shyg6863	12.8233	14.3659	14.027	12.7633	12.0866	11.4386	11.2634	12.0658	9.00931	10.186	6.44668	7.0663	cluster_1
shyg6875	0	0	0	11.8865	13.2826	14.7434	13.453	15.8858	13.5844	0	0	0	cluster_2
shyg6876	16.1683	12.1247	7.14495	5.24774	0	0	0	0	0	0	0	0	cluster_1
shyg6877	0	5.26542	0	4.18492	3.42553	3.02773	5.71161	4.27309	3.84922	4.80209	9.23944	7.63019	cluster_4
shyg6878	8.77508	10.0248	10.6488	8.56161	10.4611	9.40754	7.36824	11.2063	6.88688	11.0212	11.2692	9.12629	cluster_3
shyg6879	11.5302	13.1875	12.9373	12.8802	12.454	13.977	11.5195	11.2803	12.4027	10.7424	11.4493	0	cluster_1
shyg6881	0	5.98602	0	0	0	6.4055	0	7.26649	10.3838	11.7648	13.9106	13.9118	cluster_4
shyg6882	0	16.6198	0	16.079	0	0	0	0	0	0	0	0	cluster_1
shyg6901	7.03958	6.64456	4.82955	6.68753	4.89129	6.84398	9.04915	7.45343	10.5642	10.9556	13.0777	12.6248	cluster_4
shyg6902	0	7.23533	0	8.99126	0	0	0	0	0	0	0	0	cluster_1
shyg6904	0	0	7.9935	6.57355	6.45854	6.64325	8.48002	0	9.97093	0	10.3541	0	cluster_2
shyg6909	10.6012	12.7271	13.0359	13.3828	9.37193	6.28999	5.215	6.3165	5.57673	4.59599	7.98236	7.01289	cluster_1
shyg6911	0	6.42094	0	0	0	6.96353	10.2648	7.83112	6.63627	11.235	12.04	12.9887	cluster_4
shyg6925	0	16.4168	16.9569	17.478	17.5494	17.6283	17.472	17.6364	17.5269	17.6305	15.4152	17.5325	cluster_2
shyg6926	13.0873	0	0	0	7.13548	0	0	0	0	0	0	0	cluster_3
shyg6927	0	0	0	10.4985	14.1334	14.3559	0	12.4458	0	0	11.3966	0	cluster_2
shyg6928	6.77536	6.66604	7.56372	6.17182	11.1762	11.8305	10.652	8.64092	11.5655	10.2683	12.5168	10.5352	cluster_4
shyg6929	0	0	0	0	0	0	0	7.87373	0	10.4473	10.6379	13.1334	cluster_4
shyg6952	17.3512	12.406	9.92361	11.707	7.8093	8.17675	8.86828	10.8244	10.0726	12.265	12.3997	13.2342	cluster_3
shyg6955	8.19954	10.0663	10.7125	11.4041	11.4331	13.1333	13.1194	13.0986	13.1586	12.2205	12.4016	11.639	cluster_4
shyg6958	7.31731	11.6129	7.92774	5.11925	8.89005	10.5004	11.4715	11.4802	9.6034	9.90683	10.8335	12.3052	cluster_4
shyg6973	0	0	6.946	0	4.58574	9.27677	11.0254	0	6.03138	0	12.0155	11.4498	cluster_4
shyg6975	0	0	12.9961	11.224	13.4688	13.8146	14.148	15.1603	14.1455	14.1056	13.7869	0	cluster_2
shyg6976	0	0	0	0	4.75794	5.11488	10.2385	10.012	7.59421	0	9.6361	10.583	cluster_4
shyg6977	0	0	11.0496	7.22778	8.85398	11.9922	12.9293	12.7341	12.1712	12.7377	13.9783	12.8852	cluster_4
shyg6981	0	0	0	0	14.0554	13.8442	13.0446	14.5012	0	14.7491	15.99	0	cluster_2
shyg6988	8.81093	12.5395	13.1179	12.9875	14.2757	14.0318	14.7853	13.8604	14.5116	14.7238	14.3689	15.3454	cluster_4
shyg6990	8.69318	11.5026	11.4624	11.0714	11.7805	11.4621	11.2853	11.6665	11.9479	12.7795	13.5469	13.3019	cluster_4
shyg6994	14.3692	17.165	0	0	0	0	0	0	0	17.6602	0	0	cluster_3
shyg6997	0	7.99824	10.2563	8.31881	9.01203	11.213	11.3137	10.2181	11.2508	12.7049	10.7161	12.0483	cluster_4
shyg7003	0	0	0	0	0	0	8.42112	8.15207	7.89921	13.1683	9.36308	7.87748	cluster_4
shyg7009	0	0	0	0	0	8.15278	8.85382	11.4385	10.7536	11.1327	13.1783	12.0346	cluster_4
shyg7021	9.80845	8.20666	9.53882	12.7069	12.0026	7.72645	6.92081	8.18538	7.02914	7.42694	12.054	9.99285	cluster_1
shyg7031	0	0	0	0	0	3.32697	7.09063	0	8.1532	11.9598	12.2852	13.2387	cluster_4
shyg7038	14.2743	14.7559	14.8527	14.9108	15.1232	14.5082	14.3085	14.4158	13.4279	13.5184	12.5638	11.2789	cluster_1
shyg7041	0	7.88187	6.65238	6.04151	6.08816	8.11494	6.57329	9.22976	13.4536	14.528	15.6504	16.048	cluster_4
shyg7043	0	0	0	0	0	0	0	0	0	8.7388	10.8081	8.29498	cluster_4
shyg7044	9.41393	10.8421	13.3317	7.0497	4.71867	7.22763	9.66032	6.55173	11.926	10.4767	7.63967	6.81102	cluster_3
shyg7045	5.04853	7.58131	6.28737	6.51659	6.37907	8.5891	6.75706	6.9549	10.449	12.9404	13.4005	11.9249	cluster_4
shyg7046	0	13.3605	13.3955	11.0435	11.6824	11.9889	12.3149	12.9082	14.4636	14.3508	15.192	15.7166	cluster_4
shyg7047	0	18.1887	13.4538	13.5384	13.9427	12.2936	15.3921	12.9758	14.9912	13.7906	17.3024	17.8062	cluster_4
shyg7048	10.5903	12.7437	13.9204	14.033	13.0551	12.3756	12.783	11.778	12.7043	13.2588	12.4773	11.7904	cluster_2
shyg7055	7.05087	6.32295	8.0003	11.0384	10.1398	12.0183	12.9564	9.59462	10.4018	12.1377	11.0713	11.7057	cluster_4
shyg7056	11.6663	11.9917	13.0075	12.845	14.0964	14.0643	14.6979	14.9683	14.6746	14.972	15.158	14.9972	cluster_4
shyg7059	15.2532	13.8656	9.9622	8.48967	11.3589	12.0236	11.3225	8.61423	11.9143	12.7839	8.54961	8.9237	cluster_3
shyg7062	11.8285	14.0811	13.2986	12.3263	12.0696	11.6067	10.7867	11.0958	10.5148	8.95251	8.38613	10.5664	cluster_1
shyg7066	0	0	0	13.8775	11.1869	7.97229	8.07379	0	9.54199	13.0155	13.0361	13.6967	cluster_4
shyg7068	8.759	9.59014	10.072	10.7603	8.77854	9.11307	10.817	11.3582	9.50435	9.16908	6.7608	6.92417	cluster_2
shyg7079	0	12.02	4.81338	0	7.13858	6.32112	10.2193	7.98547	0	0	6.42084	14.7326	cluster_4
shyg7088	0	0	0	0	0	0	7.81998	0	7.21357	11.5925	11.2408	12.1759	cluster_4
shyg7091	0	10.4694	0	6.91267	6.61264	7.51856	9.4688	10.9217	8.28178	11.8245	12.2422	13.0694	cluster_4
shyg7095	18.0566	15.9712	13.0402	12.1543	11.0404	11.1358	9.28916	11.3343	10.2621	11.8092	10.8752	11.6627	cluster_3
shyg7096	11.801	11.8569	11.9711	10.0067	7.92225	8.59119	7.78632	8.78886	0	0	0	0	cluster_1
shyg7099	0	12.3842	14.9648	14.0723	9.4536	11.0358	10.0611	14.9966	12.3578	15.7967	15.8895	17.7358	cluster_4
shyg7102	12.2598	8.81394	0	12.0347	6.26268	9.93136	9.40187	8.00001	3.11398	15.3915	7.50967	12.359	cluster_3
shyg7131	16.3768	0	6.38955	0	0	6.39142	7.84438	0	0	0	0	0	cluster_1
shyg7144	0	0	0	0	5.9738	7.72168	7.56179	11.0877	6.87975	0	0	0	cluster_2
shyg7145	0	13.8624	10.8692	3.87958	5.92414	7.43706	8.2358	8.88138	8.49457	10.3063	9.08808	9.5262	cluster_4
shyg7151	13.0646	11.313	11.1429	9.59091	9.21358	10.0965	9.84749	10.1598	10.4754	0	9.79052	0	cluster_1
shyg7155	0	0	12.3441	13.8995	15.4336	17.0848	19.0525	19.5432	19.2512	19.1918	13.1212	0	cluster_2
shyg7170	16.0264	11.2223	10.817	9.8929	7.02743	0	0	0	0	0	5.57382	0	cluster_1
shyg7179	3.33744	4.76583	6.71653	5.3493	6.61995	7.01221	7.2059	8.06019	7.8677	8.60511	9.83372	11.1814	cluster_4
shyg7180	12.0109	11.1265	12.5071	11.3774	11.4577	12.53	13.1505	12.1884	13.2416	11.3448	14.7178	13.3172	cluster_4
shyg7181	14.9757	14.1846	14.835	14.3472	13.8318	15.4879	16.4157	16.6112	16.6676	16.8288	17.929	16.4047	cluster_4
shyg7183	16.1271	16.5229	16.6721	16.772	15.901	16.1442	14.7172	14.3414	13.2142	12.3795	13.0381	11.2097	cluster_1
shyg7184	6.97453	12.452	12.8432	12.2678	10.0255	8.58907	7.04983	6.1946	3.6065	0	0	0	cluster_1
shyg7185	17.3835	12.8199	12.2877	11.5124	13.5636	13.3969	11.7764	12.2156	11.8167	13.5596	11.107	10.427	cluster_1
shyg7186	13.1878	14.0403	15.6562	14.3762	12.8642	14.4397	13.4351	12.7955	10.5629	11.2602	9.99152	11.511	cluster_1
shyg7188	14.2444	15.6835	16.5644	16.3192	15.2184	15.2486	15.115	14.0149	12.9908	11.619	11.1531	10.5769	cluster_1
shyg7236	8.63213	11.2466	9.68125	7.28991	6.56256	7.34212	6.99082	5.71404	7.11649	6.10042	3.28169	7.88035	cluster_1
shyg7242	0	8.74996	7.92701	6.52746	8.43443	6.89207	8.11457	0	8.3161	13.8873	12.2102	10.5015	cluster_4
shyg7249	12.7602	8.00275	6.48146	4.69387	4.33275	3.7688	4.56628	5.88785	7.1722	10.8928	10.1207	12.3044	cluster_3
shyg7278	0	0	5.17701	6.24538	8.72352	6.35476	7.96212	9.54745	7.37096	9.45491	9.74266	9.61614	cluster_4
shyg7299	0	6.64662	0	6.26269	8.73143	11.0667	11.4138	6.92164	13.8753	11.9343	10.7499	8.79095	cluster_4
shyg7301	0	0	0	0	7.6601	7.67088	7.77309	10.4655	10.2476	12.0228	12.5337	11.399	cluster_4
shyg7304	0	10.1813	0	0	0	0	0	13.8099	13.9724	14.1638	14.0454	0	cluster_4
shyg7309	0	0	12.6645	11.9451	0	11.7521	13.3421	14.3312	14.3094	10.6431	13.8757	0	cluster_2
shyg7315	0	0	0	0	0	0	0	18.4416	16.8184	17.221	17.0028	17.6041	cluster_4
shyg7331	0	0	0	0	4.65549	5.61199	7.61455	9.79189	10.3869	11.2374	10.5672	11.9056	cluster_4
shyg7332	20.308	11.6313	11.1218	0	0	0	8.54044	12.2478	8.25414	0	8.6298	0	cluster_3
shyg7338	0	0	0	0	0	4.78988	7.82708	0	9.49251	0	11.4334	13.7074	cluster_4
shyg7347	0	0	0	0	0	0	0	12.2875	12.8247	13.9883	14.0637	16.0486	cluster_4
shyg7349	0	0	0	15.9203	11.8931	11.7599	16.4121	0	16.2366	0	15.2496	16.3737	cluster_4
shyg7358	5.89516	7.33518	7.32225	6.28332	10.7005	9.5114	10.6414	11.4028	12.3245	13.0091	12.7265	13.0234	cluster_4
shyg7363	0	12.7188	12.3361	8.33208	8.09707	9.52813	10.7871	11.3459	10.2319	11.7305	0	0	cluster_2
shyg7365	0	0	0	0	0	0	0	13.4509	13.9904	12.901	14.1711	13.8866	cluster_4
shyg7366	0	17.9368	0	0	8.3404	8.34205	11.8298	16.4229	15.5441	17.2518	17.0816	17.6319	cluster_4
shyg7367	0	0	0	0	5.00143	4.19963	6.06953	12.2928	11.3076	12.3304	7.41658	8.7016	cluster_4
shyg7370	17.826	12.9737	12.503	8.51525	8.59808	8.11887	6.8185	0	5.22951	17.7997	5.86709	20.2658	cluster_3
shyg7371	5.8299	7.21214	4.09246	4.2572	2.35229	2.97862	2.2728	5.11256	2.30523	2.07908	1.96662	2.49142	cluster_1
shyg7372	15.2868	13.6545	12.2438	4.19355	6.60302	4.24008	6.69552	9.01524	6.82335	0	0	0	cluster_1
shyg7375	10.5248	12.8056	14.8342	13.9732	14.3695	14.6347	14.6788	15.7441	16.3033	16.9015	15.4113	16.4339	cluster_4
shyg7376	0	0	0	0	0	0	0	0	0	0	8.70837	10.3166	cluster_4
shyg7380	0	0	0	7.86783	7.46387	9.0579	9.30681	0	0	0	0	0	cluster_2
shyg7382	7.5111	9.57502	4.85522	3.98205	3.94569	5.81277	8.65099	9.38242	10.0472	12.2661	13.616	14.0908	cluster_4
shyg7383	0	0	5.91662	0	8.12305	10.4131	11.1054	12.0268	13.0531	15.4571	16.755	16.8872	cluster_4
shyg7384	12.3587	10.4924	10.8586	8.70458	7.6242	7.23092	8.435	9.86527	10.3291	11.3975	12.6419	12.2159	cluster_3
shyg7385	16.2703	0	0	12.0625	10.1454	0	0	0	0	0	0	0	cluster_1
shyg7394	0	9.43036	11.1935	7.38406	7.71101	10.2213	10.3817	13.2538	9.49996	12.2198	13.0153	0	cluster_2
shyg7396	9.95559	10.303	12.1352	12.2646	12.3947	12.2003	13.4238	12.9639	13.5394	13.0429	13.2994	11.9914	cluster_4
shyg7408	0	6.35767	10.5959	6.6721	7.16428	0	0	0	0	0	0	0	cluster_1
shyg7410	0	10.3722	8.52175	6.68793	0	0	0	0	0	0	0	0	cluster_1
shyg7420	0	0	5.98992	7.03656	8.75216	8.90212	12.7496	0	10.9955	12.5412	13.0547	14.937	cluster_4
shyg7421	0	0	0	0	0	0	4.60712	9.02208	9.9092	12.144	13.1283	14.2037	cluster_4
shyg7422	10.8024	9.78191	7.01299	6.62057	6.64382	4.75284	7.11043	8.27176	8.68053	9.68296	7.36597	7.46743	cluster_3
shyg7425	18.819	11.1787	9.24149	6.66311	6.28481	6.19208	7.26304	10.3465	7.38791	9.43946	8.86484	0	cluster_3
shyg7426	0	12.5754	0	0	5.18259	8.14092	9.77517	8.65648	11.3896	12.6025	11.2866	11.1164	cluster_4
shyg7436	9.30459	7.47349	11.8295	7.77583	6.51458	5.23846	6.42671	4.08091	2.90345	9.67423	5.04353	4.83642	cluster_1
shyg7438	16.635	14.5263	9.576	7.41825	6.88285	8.08851	10.4695	11.6727	12.05	14.422	14.8156	15.6619	cluster_3
shyg7452	11.1101	11.893	13.2776	14.1508	12.0208	10.8	12.776	12.8904	12.8378	12.4601	14.9242	12.8054	cluster_4
shyg7453	4.36967	4.70407	4.49941	3.18019	5.79352	4.81042	5.85094	5.5334	5.0642	5.50497	5.27244	5.08863	cluster_4
shyg7455	5.84803	7.43156	6.77176	5.016	6.36674	5.06156	5.40122	5.1681	4.53092	6.14806	9.59751	5.49866	cluster_3
shyg7458	9.34979	12.4038	9.1683	7.80509	8.96917	11.1851	10.4267	12.7704	11.6198	11.7824	11.2695	12.1322	cluster_4
shyg7460	0	0	0	0	0	0	0	0	0	0	15.943	16.9436	cluster_4
shyg7465	9.30264	10.3474	9.61749	11.2442	10.0207	9.65643	9.37237	9.87979	9.7441	6.53175	7.0834	6.48972	cluster_1
shyg7474	0	6.90731	9.6208	5.64014	6.8237	6.3154	0	0	0	0	0	0	cluster_1
shyg7479	10.3197	0	4.17292	5.37923	12.6574	13.7625	12.5991	13.0145	15.5777	14.439	15.8125	15.0605	cluster_4
shyg7486	14.5449	0	0	8.73566	13.3554	15.5531	14.3743	16.7411	16.646	16.7804	10.9981	14.4695	cluster_4
shyg7488	7.39966	9.32761	9.98294	8.73764	5.45164	5.79552	4.08051	5.18353	3.92574	5.94017	7.13779	6.59785	cluster_1
shyg7489	0	9.51279	8.09375	9.34766	7.66015	6.89688	8.07678	8.60074	6.39024	10.2832	8.61103	8.04394	cluster_2
shyg7491	0	9.4021	0	0	0	0	14.133	14.223	15.2124	16.0395	15.9543	17.162	cluster_4
shyg7515	14.33	17.3307	0	0	0	0	0	0	0	17.5819	0	0	cluster_3
shyg7516	0	0	0	10.7136	16.3374	16.6667	16.95	16.7652	16.4421	16.3344	15.8679	13.9097	cluster_4
shyg7518	9.71507	13.0199	12.4123	13.6937	14.7692	14.8442	14.9647	14.3256	13.2634	13.9335	12.9319	11.6249	cluster_2
shyg7531	11.3788	13.0625	13.4841	8.55189	8.13422	11.5097	11.0282	10.9874	9.25553	10.163	8.51552	11.6408	cluster_3
shyg7536	0	17.2257	0	0	0	15.6125	15.5025	0	16.632	16.5525	16.7474	16.6285	cluster_4
shyg7549	7.90608	5.795	2.79208	4.55861	1.57162	6.43043	5.46522	5.42151	6.51964	6.09846	6.72755	8.33648	cluster_3
shyg7554	11.5424	9.93875	10.4821	9.03522	12.4407	14.3334	14.3521	14.7228	15.8448	15.6176	15.3967	16.2073	cluster_4
shyg7555	0	10.6096	7.81762	11.2887	12.1808	14.314	14.2705	14.2421	15.5196	14.7293	15.664	13.9645	cluster_4
shyg7561	0	0	0	0	7.07665	10.933	12.4275	13.8248	14.7451	16.9303	16.2642	16.823	cluster_4
shyg7562	13.7047	8.30515	7.20288	8.39291	6.72716	4.33666	9.02391	9.2485	11.6847	10.8191	11.4994	12.5642	cluster_3
shyg7567	0	0	0	0	7.14413	11.9534	0	0	0	0	12.3496	15.5769	cluster_4
shyg7579	15.692	11.1063	10.133	8.66371	10.3196	11.8522	7.39929	0	14.3573	0	14.6405	0	cluster_1
shyg7588	14.521	13.4982	14.3208	15.1343	14.3517	12.4089	14.4149	12.9694	11.1395	0	0	12.5979	cluster_1
shyg7592	0	3.57641	2.12636	0.222854	2.73165	6.523	8.4902	8.03291	9.81364	12.0775	13.049	12.7784	cluster_4
shyg7600	9.3471	9.60804	0	9.96504	12.3022	12.4705	12.2275	14.0376	12.1001	10.3468	12.4167	10.4608	cluster_4
shyg7601	2.1228	4.94273	4.89253	3.47965	6.84752	6.87703	5.8693	6.33261	7.68631	8.5772	9.58152	9.95724	cluster_4
shyg7604	12.1791	8.92957	8.19122	7.04622	4.82114	2.3966	6.94456	5.61952	8.66758	7.56169	9.05046	10.7178	cluster_3
shyg7610	3.47998	5.14688	5.03978	7.98013	10.3211	14.0193	14.7222	15.7862	15.0754	14.8498	14.4022	11.845	cluster_4
shyg7614	0	3.84467	6.85924	0	0	6.61789	3.07701	0	6.67089	10.4211	5.4951	0	cluster_4
shyg7619	0	0	0	0	0	0	12.6785	14.3063	12.2741	0	11.8136	14.2353	cluster_4
shyg7622	8.03142	6.88195	10.0496	9.47911	9.35509	9.78162	5.61812	7.34233	5.85549	7.23191	5.4282	6.31701	cluster_1
shyg7624	10.9278	11.9372	11.7305	9.98487	9.95876	10.2164	12.1815	11.8362	12.8801	13.191	12.0919	9.95114	cluster_3
shyg7627	0	7.04233	0	9.59667	11.9776	15.0558	14.2784	12.5343	9.71701	0	8.78624	8.07077	cluster_2
shyg7628	0	0	0	0	0	0	0	7.1289	0	9.34617	11.1691	7.96612	cluster_4
shyg7631	15.0172	15.2639	14.1093	15.1281	15.1255	15.0628	12.09	14.91	11.6353	11.0838	11.6423	11.7104	cluster_1
shyg7633	0	14.171	14.1446	13.4098	12.1196	14.2434	0	12.6175	14.1614	13.9012	14.6867	11.8782	cluster_2
shyg7634	13.4297	12.8947	14.084	13.5438	12.3955	12.4842	12.284	10.2396	10.857	11.209	11.1244	12.2994	cluster_1
shyg7635	12.8234	9.99816	12.6387	9.12609	8.23176	12.5261	6.90315	9.27459	6.42154	9.85003	9.14725	0	cluster_1
shyg7637	14.4259	9.47567	8.52962	9.33007	7.09392	5.81128	6.51959	9.4396	7.24469	10.169	11.365	9.34692	cluster_3
shyg7638	12.5138	12.2919	11.4147	10.8353	10.2709	10.6058	10.5285	12.782	13.9702	14.0643	14.9359	15.1444	cluster_4
shyg7639	9.91679	11.6019	12.0026	10.9283	10.0517	11.4569	11.7476	12.2615	11.6461	12.028	13.082	10.8908	cluster_4
shyg7640	16.9341	14.3105	13.632	11.3554	11.6537	12.5146	12.5464	13.2266	13.4146	14.6467	15.8541	15.6805	cluster_3
shyg7641	0	12.4496	11.0682	8.95984	8.14567	8.08877	6.51023	0	6.91611	18.3646	8.12049	0	cluster_2
shyg7643	15.7627	11.4504	14.8363	13.4759	13.0095	9.05792	0	0	11.0396	0	11.2004	0	cluster_1
shyg7644	0	0	0	0	0	0	0	0	0	10.229	9.87492	10.2235	cluster_4
shyg7651	11.1914	9.23634	6.60315	0.288895	3.02427	2.9117	2.2572	0	3.97215	6.78976	4.79901	8.54546	cluster_3
shyg7654	0	0	0	0	10.4213	0	0	0	9.67026	0	0	0	cluster_2
shyg7656	0	0	0	8.73887	9.10123	11.3287	0	0	12.5262	0	15.6462	0	cluster_2
shyg7661	0	0	17.3553	0	0	0	0	16.4807	15.9064	0	16.0794	0	cluster_2
shyg7667	0	13.2793	4.33109	6.60025	7.05084	9.52067	10.4827	10.4079	11.3667	12.8869	13.4132	13.4462	cluster_4
shyg7692	0	13.3077	0	11.654	12.9251	13.6009	14.8957	0	13.8926	0	0	0	cluster_2
shyg7704	0	8.51603	8.06983	6.37347	6.76098	8.42051	7.91451	8.49321	8.53691	0	6.52217	0	cluster_2
shyg7724	0	0	0	0	0	0	0	0	0	0	11.166	12.2325	cluster_4
shyg7731	0	0	0	4.56163	7.15066	6.81781	9.47076	7.63988	9.57854	13.8391	10.4481	16.1361	cluster_4
shyg7749	7.4451	8.70821	7.09058	6.99424	8.30567	10.746	10.3355	11.3115	12.0316	12.2945	11.0377	10.7633	cluster_4
shyg7758	15.6707	19.4692	0	0	0	0	0	0	0	20.3627	0	0	cluster_3
shyg7773	0	0	0	0	4.41722	6.5017	3.46547	8.64505	8.09431	9.61517	6.53792	7.26513	cluster_4
shyg7779	0	0	0	0	6.77394	8.66273	12.479	12.2631	12.0087	0	0	0	cluster_2
shyg7780	0	16.3692	0	0	7.2387	7.13742	6.67175	9.32292	6.96753	10.2455	0	9.32972	cluster_2
shyg7787	0	7.00568	0	2.97403	3.69144	6.51798	8.68127	0	11.128	10.2623	12.6344	9.0094	cluster_4
shyg7788	0	0	0	0	0	0	0	0	10.3503	0	7.09059	0	cluster_4
shyg7795	11.2467	12.349	10.1109	6.13488	0	7.68128	11.0339	10.7466	8.99506	11.4711	11.3845	13.5105	cluster_3
shyg7803	11.0731	9.96832	9.35751	9.65304	7.15856	7.84657	8.43643	9.73937	12.5054	0	13.8144	0	cluster_1
shyg7819	0	0	0	0	0	3.74037	6.88561	7.98693	11.919	11.6172	12.5301	12.4746	cluster_4
shyg7820	0	0	0	0	0	0	0	0	7.86391	12.3666	14.8402	15.2915	cluster_4
shyg7821	0	4.41158	3.08776	6.84446	6.35546	5.15259	7.9187	10.9005	11.1563	14.3044	16.3608	15.8651	cluster_4
shyg7823	0	0	0	0	0	0	0	0	7.7163	0	0	9.67396	cluster_4
shyg7830	8.96727	8.2734	10.2362	7.63163	7.2379	10.1225	9.92594	10.006	10.5223	12.0743	14.4369	13.9404	cluster_4
shyg7832	0	0	0	0	0	0	0	0	6.4075	9.46699	10.5774	12.5967	cluster_4
shyg7838	7.6356	8.29677	10.047	5.4995	5.83331	4.23753	7.4289	9.88596	8.04892	9.56297	7.09527	7.8251	cluster_3
shyg7860	0	0	0	0	0	7.146	0	0	12.487	17.6865	14.77	0	cluster_4
shyg7864	0	0	0	0	0	0	4.94763	7.12197	5.66738	10.01	11.375	11.6473	cluster_4
shyg7878	8.13376	10.5441	11.2261	10.6655	10.4627	9.9234	9.88633	9.96259	7.56791	8.16766	0	0	cluster_1
shyg7896	0	0	0	0	5.63414	0	8.53756	9.41251	0	0	0	8.05794	cluster_2
shyg7899	11.2995	6.64951	5.5301	3.99405	5.54657	6.86484	8.99178	10.6199	10.7547	12.0898	10.0908	10.5497	cluster_3
shyg7934	0	0	0	0	7.81634	12.4777	14.5949	14.427	14.5673	16.2844	14.5067	16.4171	cluster_4
shyg7935	4.59795	0.594822	0	5.8507	6.63144	7.46133	8.58057	4.24065	9.831	11.1758	9.49064	9.67573	cluster_4
shyg7936	9.54579	7.81436	7.55723	7.64907	10.5704	11.2967	12.4443	13.9053	14.6771	15.2811	15.1005	15.8058	cluster_4
shyg7938	18.6939	17.1656	16.5225	0	0	0	0	0	0	0	0	0	cluster_1
shyg7975	10.9792	12.8595	13.472	13.2684	12.0766	11.2753	11.2196	11.0744	10.5691	7.86491	6.81461	5.72918	cluster_1
shyg7979	0	8.01471	0	6.88048	6.14684	7.2486	10.3719	0	0	0	0	0	cluster_2
shyg8010	13.3892	14.3066	13.614	12.8716	12.8947	13.6568	12.431	11.511	11.21	11.8963	9.57592	11.456	cluster_1
shyg8015	0	8.51621	8.61222	8.15849	6.94047	9.02437	8.53156	10.45	11.6409	14.2975	16.8551	16.8406	cluster_4
shyg8016	0	0	11.8962	0	12.6889	9.59358	12.8383	13.1081	15.3638	15.3353	15.0375	15.8204	cluster_4
shyg8018	0	0	0	0	0	0	0	0	0	0	12.3045	14.7565	cluster_4
shyg8019	0	0	0	0	0	0	0	0	10.8865	13.5217	13.4921	14.8872	cluster_4
shyg8020	0	15.2421	0	0	0	0	13.1559	0	14.2563	16.274	16.5459	16.827	cluster_4
shyg8024	0	0	0	0	0	0	0	0	7.47745	12.9184	16.193	16.1182	cluster_4
shyg8067	0	10.4788	11.535	9.38172	9.52633	10.8172	0	0	0	0	0	0	cluster_1
shyg8087	0	0	0	4.70452	11.0051	11.6139	12.697	12.1983	12.1779	8.96247	9.04159	10.8354	cluster_4
shyg8092	0	0	6.92155	0	8.07126	12.1712	13.8894	15.2502	15.3031	17.0051	16.3541	16.7236	cluster_4
shyg8098	10.3051	10.2462	11.0208	9.93976	9.91887	9.03617	10.004	8.67778	8.55201	9.15224	8.23369	8.2544	cluster_1
shyg8099	0	8.84337	9.67293	8.80642	8.87976	7.56368	10.6668	11.7434	11.2256	13.7139	14.0054	14.7497	cluster_4
shyg8100	0	0	0	9.02051	10.3446	10.7139	9.34718	9.22376	9.70087	7.97419	7.54644	11.3515	cluster_4
shyg8102	14.8882	13.2413	15.08	10.419	9.67256	6.69015	10.4573	7.68584	7.5445	7.49197	6.45787	7.03166	cluster_1
shyg8142	0	0	0	0	10.8264	0	0	0	0	19.6912	13.202	11.3915	cluster_4
shyg8157	0	0	0	0	0	0	0	0	0	0	11.7485	11.4782	cluster_4
shyg8169	0	0	7.71955	5.21132	8.582	4.97863	6.78542	9.17553	6.61922	0	10.4605	0	cluster_2
shyg8172	0	8.46404	5.77644	3.7224	8.85319	10.6987	10.6694	10.3384	12.2624	14.8098	13.9953	15.6451	cluster_4
shyg8205	0	0	0	7.07129	0	0	9.81472	11.506	9.67509	0	15.231	12.6694	cluster_4
shyg8210	12.7631	13.696	14.9838	13.3148	14.6974	14.3408	14.0044	13.6121	13.2823	13.9702	15.6127	13.0838	cluster_2
shyg8211	10.1704	13.5787	13.0332	14.6422	13.2321	13.2274	11.5194	10.2487	10.1803	11.9842	10.474	9.72036	cluster_1
shyg8212	0	0	18.0635	0	16.1762	16.4913	0	0	0	0	0	0	cluster_2
shyg8213	6.61395	7.29469	8.37304	10.0387	14.63	7.9382	8.5012	5.43475	8.66546	5.51521	6.52027	6.24373	cluster_2
shyg8214	14.1226	14.9174	15.8811	16.0939	16.1128	16.0399	16.1654	14.897	14.9422	13.2823	14.098	15.1818	cluster_2
shyg8216	9.50675	9.78903	9.51185	9.66717	7.99116	6.57801	6.36229	7.05417	6.64857	0	6.73249	6.91757	cluster_1
shyg8221	18.0427	17.4776	15.5831	16.4671	15.8929	16.2442	17.6321	14.5129	17.0296	0	11.7458	0	cluster_1
shyg8227	0	9.48993	8.34086	9.3841	7.24309	6.14089	5.86408	7.49809	5.90885	9.33397	5.8503	0	cluster_2
shyg8238	16.7824	18.5231	0	0	0	0	0	0	0	18.3617	0	0	cluster_3
shyg8239	5.6746	6.53916	6.88902	7.19123	10.5432	10.4123	10.1782	9.82308	11.5503	8.86059	10.6605	5.33139	cluster_2
shyg8246	0	7.7073	5.29887	2.94989	2.9886	5.83204	3.7387	6.20303	9.56336	9.15356	7.35076	10.6437	cluster_4
shyg8253	11.4106	13.7985	14.5993	15.4694	15.1546	15.1381	15.1064	15.4307	14.6319	13.3226	15.1695	14.2725	cluster_2
shyg8259	16.549	13.963	8.15051	9.88828	7.26863	8.0539	9.19826	11.1486	9.31841	12.0177	13.0251	13.5928	cluster_3
shyg8266	5.75948	9.48859	9.5605	9.39489	4.98164	4.76619	11.8911	7.77115	7.25875	7.55638	6.37679	8.91726	cluster_2
shyg8278	17.3767	12.6034	11.8644	8.0362	7.15206	7.09472	3.49172	0	0	0	7.0913	0	cluster_1
shyg8292	0	0	0	0	0	0	0	13.4308	13.854	15.2093	0	0	cluster_4
shyg8296	11.4685	10.3176	10.1703	9.11281	14.0434	14.1929	15.2311	15.2436	15.2539	15.5922	15.4381	16.4409	cluster_4
shyg8297	13.8226	17.2338	16.6082	15.5284	16.1152	16.5969	16.6688	16.1458	15.7408	15.9609	14.1006	15.0709	cluster_2
shyg8299	0	10.5153	11.3202	7.79582	5.39676	10.4721	13.6185	13.0649	14.1588	13.5287	15.8791	15.396	cluster_4
shyg8302	4.80308	7.5453	5.32682	4.75515	7.242	8.53008	10.5494	11.3075	11.4562	11.2121	14.7727	14.8182	cluster_4
shyg8311	0	0	0	0	0	0	0	0	0	11.3228	14.6569	12.5745	cluster_4
shyg8312	0	8.53952	8.7578	8.50831	12.1269	6.90901	11.496	0	0	0	0	0	cluster_2
shyg8313	15.2848	15.7934	15.1284	15.8048	15.9382	15.4427	15.4238	14.6782	15.4375	14.7467	14.3101	15.2554	cluster_1
shyg8314	11.4572	9.95588	10.3558	10.4391	9.61795	10.7272	9.71686	8.561	11.2302	11.3206	11.8841	11.5704	cluster_3
shyg8316	11.185	12.6121	12.3975	12.7616	13.5095	12.9831	13.1763	12.9496	12.879	0	12.1474	11.5374	cluster_2
shyg8336	17.8149	19.0455	17.3873	16.7602	16.6772	16.7067	16.216	16.4792	14.7631	16.2992	12.0507	0	cluster_1
shyg8338	0	0	0	0	0	8.07712	8.38845	12.5063	13.3646	13.8924	13.78	12.7432	cluster_4
shyg8367	0	0	0	14.711	0	9.97759	0	14.4337	13.0835	0	15.6798	14.6691	cluster_4
shyg8373	0	0	9.1667	3.64063	5.3367	9.33789	9.41618	9.59178	12.0128	12.1708	13.6167	12.2764	cluster_4
shyg8386	7.80164	9.00838	9.01517	7.44335	6.82637	6.35913	6.43889	6.22197	6.76367	6.36987	6.48847	7.23571	cluster_1
shyg8405	18.0159	0	0	0	0	0	0	0	0	9.39689	6.42097	9.78725	cluster_3
shyg8409	7.87782	8.53822	10.1353	5.68088	10.0438	9.19773	11.0514	12.0263	13.8312	14.6806	15.516	16.0188	cluster_4
shyg8413	0	0	0	5.45515	6.15003	7.4906	0	0	0	0	0	0	cluster_2
shyg8414	0	0	0	0	0	0	7.07028	10.1623	0	0	11.7008	10.8681	cluster_4
shyg8423	0	0	11.2524	0	12.8321	13.1491	10.5351	12.1466	12.361	13.3961	14.8301	13.8129	cluster_4
shyg8432	0	10.7508	15.4106	12.9942	11.9824	12.9635	14.3613	13.3489	15.3112	15.7317	12.9921	15.3669	cluster_4
shyg8433	15.87	13.9425	8.1452	6.64218	7.05002	9.49523	9.73648	0	10.4019	0	14.4936	15.5709	cluster_3
shyg8451	20.276	16.3655	16.4713	15.3654	10.2789	0	10.4692	0	10.0677	18.0486	10.6829	21.7389	cluster_3
shyg8458	9.77904	10.6167	8.73065	7.41632	6.60355	5.96078	5.01817	8.03005	5.52901	9.34319	8.03951	8.33606	cluster_3
shyg8468	0	0	0	0	0	0	0	7.89585	9.14412	9.69979	9.11314	8.03297	cluster_4
shyg8475	0	0	0	0	0	0	0	12.1531	7.22897	10.4411	7.12305	0	cluster_4
shyg8476	8.16777	7.76508	8.04211	7.18734	7.61269	9.20462	9.83777	9.18826	16.1048	15.0828	16.0625	15.3794	cluster_4
shyg8514	0	0	0	0	8.69166	8.3378	7.56994	10.6526	9.86957	12.2735	12.5578	12.9499	cluster_4
shyg8573	15.5332	18.0304	0	0	0	0	0	0	0	17.9093	0	0	cluster_3
shyg8574	0	7.14142	0	0	0	0	7.88713	0	0	0	0	0	cluster_2
shyg8581	0	13.0401	7.36744	6.06842	6.91112	0	0	0	0	0	0	0	cluster_1
shyg8582	0	0	0	7.18991	5.35113	8.74301	6.67619	10.731	8.04785	12.0322	12.5155	13.513	cluster_4
shyg8628	15.1071	15.0352	14.3398	12.8817	11.7858	12.3714	12.5605	13.4238	13.4352	14.8315	11.5294	15.4242	cluster_3
shyg8629	0	0	0	0	7.23841	0	0	6.95068	0	13.221	8.79053	8.67769	cluster_4
shyg8638	0	0	6.57154	6.11314	6.26447	4.61673	4.87584	8.17891	11.4843	9.4082	12.7739	14.0031	cluster_4
shyg8639	0	0	0	0	0	0	0	0	7.36573	10.9309	12.9093	13.4363	cluster_4
shyg8640	11.0845	9.07211	8.43742	8.94836	9.27904	8.43947	7.53696	11.0797	13.3732	12.8547	17.0375	17.5489	cluster_4
shyg8641	0	6.19023	7.79653	5.62501	8.07831	7.9025	6.25788	9.51351	13.6326	14.2165	16.5716	17.5735	cluster_4
shyg8643	0	0	0	0	0	0	0	0	15.3915	16.8897	17.074	17.4402	cluster_4
shyg8673	13.7192	16.2936	16.8655	16.0858	15.8127	16.2363	16.1708	16.3004	16.4921	16.5279	16.4411	16.3202	cluster_2
shyg8684	0	9.95713	10.6003	7.7301	8.30649	8.45214	9.0257	12.1474	8.52821	0	0	0	cluster_2
shyg8688	14.4935	10.9909	9.52024	8.08363	7.12624	8.2578	9.19883	9.57222	9.70346	11.087	11.8783	11.9316	cluster_3
shyg8693	0	8.27188	10.655	0	9.27424	7.92132	0	13.6819	14.4355	14.6249	16.4584	15.7109	cluster_4
shyg8702	0	6.4195	7.67335	0	4.83927	7.41211	7.68719	9.09142	6.01407	0	0	0	cluster_2
shyg8712	16.203	12.7964	10.047	0	0	0	0	10.065	8.95004	0	14.6559	14.6901	cluster_3
shyg8715	15.9497	16.396	16.2971	15.3111	16.0316	16.1724	15.7021	16.325	14.2287	15.3843	14.7596	14.5621	cluster_1
shyg8763	0	0	0	0	6.72549	0	0	6.95853	6.46391	9.16611	10.7785	10.8897	cluster_4
shyg8788	19.8928	0	0	0	0	0	0	11.3737	0	10.1355	9.36585	9.2682	cluster_3
shyg8842	0	6.38225	9.30916	0.636627	5.1618	4.72014	7.81299	8.56062	8.36005	9.08851	8.91327	13.7241	cluster_4
shyg8865	0	0	0	0	0	0	0	0	7.03922	17.7776	0	14.5794	cluster_4
shyg8867	20.8539	20.0888	18.8487	18.602	18.1065	20.0441	20.2319	20.4186	21.006	20.1265	20.4842	21.2725	cluster_3
shyg8957	5.75948	9.48859	9.5605	9.39489	4.98164	4.76619	11.8911	7.77115	7.25875	7.55638	6.37679	8.91726	cluster_2
shyg8982	0	0	0	0	0	0	6.47272	6.64142	9.10982	10.7925	11.9376	13.3814	cluster_4
shyg8983	0	4.54312	6.43168	5.31173	4.81623	6.7319	3.80247	6.07758	9.82562	10.0682	12.0233	12.3327	cluster_4
shyg8985	0	0	3.74451	7.5913	9.36397	10.9291	10.3876	10.0694	13.0003	10.6818	14.0124	14.3949	cluster_4
shyg9002	17.1785	0	0	10.7381	14.2899	13.5265	13.1957	17.7873	15.7237	16.935	17.3472	0	cluster_2
shyg9041	14.9997	13.9356	14.3312	14.4173	14.8117	13.8316	14.0503	14.2778	14.0974	14.4842	13.1012	14.2897	cluster_1
shyg9079	0	14.9265	16.3386	8.04034	12.1204	12.379	12.9221	13.2267	14.4457	14.4946	15.8444	15.1108	cluster_4
shyg9080	7.56531	10.2582	8.6927	10.3901	10.8779	11.0062	11.7373	11.8913	12.3651	12.0142	11.5923	12.5448	cluster_4
shyg9086	19.2404	10.5969	9.4691	7.63542	7.2209	7.33887	9.2301	10.585	10.0436	12.2223	12.6462	13.4337	cluster_3
shyg9125	0	0	4.18153	0	0	0	0	0	11.4174	15.1539	12.4973	0	cluster_4
shyg9187	0	10.3214	0	9.99838	15.4097	14.6547	14.9062	13.8756	13.4474	14.5826	12.4259	14.179	cluster_4
shyg9191	12.8751	15.8188	15.6161	15.2781	16.2223	16.486	16.9021	16.6732	16.4612	15.4525	14.4305	14.4277	cluster_2
shyg9205	15.5616	16.2218	14.3852	12.2493	6.53194	8.61675	10.2782	11.5136	7.61228	0	0	0	cluster_1
shyg9219	0	0	0	0	0	7.16005	7.04936	0	7.69638	11.9522	11.3958	12.9639	cluster_4
